# Supplementary material for: The Swr1 chromatin-remodeling complex prevents genome instability induced by replication fork progression defects
Source: PubMed Central journal article supplement (PMC6134005; doi:10.1038/s41467-018-06131-2), 2018-09-11
Supplement: 41467_2018_6131_MOESM1_ESM.pdf [file 41467_2018_6131_MOESM1_ESM.pdf]

## SUPPLEMENTARY INFORMATION FOR

The Swr1 chromatin-remodeling complex prevents genome instability induced by replication fork progression defects

By

Anjana Srivatsan<sup>1</sup>, Binzhong Li<sup>1</sup>, Barnabas Szakal<sup>2</sup>, Dana Branzei<sup>3</sup>, Christopher D. Putnam<sup>1,3</sup>, and Richard D. Kolodner<sup>1,4,5,6</sup>

From

Ludwig Institute for Cancer Research<sup>1</sup>, Departments of Medicine<sup>2</sup> and Cellular and Molecular Medicine<sup>3</sup>, Moores-UCSD Cancer Center<sup>4</sup> and Institute of Genomic Medicine<sup>5</sup>, University of California School of Medicine, San Diego, 9500 Gilman Drive, La Jolla, CA 92093-0669

And

The FIRC Institute of Molecular Oncology Foundation<sup>6</sup>, Via Adamello 16, 20139 Milan, Italy

Address correspondence to:  
Richard D. Kolodner  
rkolodner@ucsd.edu  
(858) 534-7804 (phone)  
(858) 822-4479 (fax)

# Supplementary Figure 1

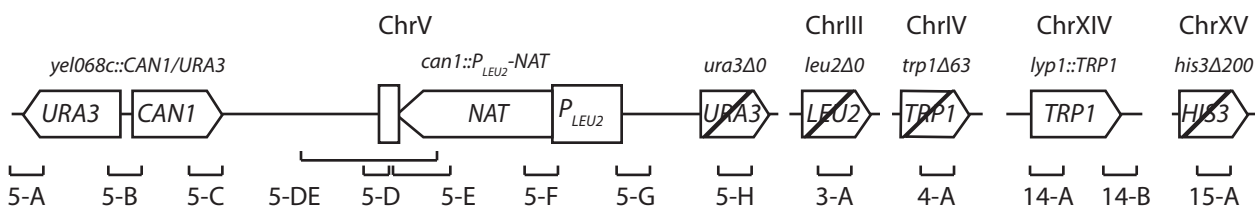

A

| Junction: | 5-A     | 5-B     | 5-C      | 5-DE    | 5-D     | 5-E    | 5-F     | 5-G      | 5-H     | 3-A    | 4-A     | 14-A    | 14-B    | 15-A    |
|-----------|---------|---------|----------|---------|---------|--------|---------|----------|---------|--------|---------|---------|---------|---------|
| ASYG987   | 262/200 | 220/211 | 427/215  | 139/199 | 49/131  | 15/0   | 137/109 | 397/117  | 228/117 | 208/67 | 352/121 | 208/171 | 71/313  | 271/107 |
| ASYG988   | 455/212 | 522/219 | 850/222  | 185/279 | 119/160 | 40/127 | 155/91  | 666/88   | 437/145 | 251/51 | 548/117 | 308/203 | 191/357 | 545/162 |
| ASYG989   | 234/142 | 272/165 | 421/153  | 104/18  | 65/79   | 17/0   | 106/79  | 354/71   | 302/103 | 180/32 | 315/93  | 221/152 | 103/301 | 261/95  |
| ASYG281   | -/-     | -/-     | -/-      | -/-     | -/-     | -/-    | 145/59  | 692/94   | 381/133 | 131/27 | 261/80  | 143/128 | 69/258  | 264/104 |
| ASYG282   | -/-     | -/-     | -/-      | -/-     | -/-     | -/-    | -/-     | -/-      | 197/65  | 99/37  | 264/59  | 148/91  | 108/196 | 187/61  |
| ASYG283   | -/-     | -/-     | -/-      | -/-     | -/-     | -/-    | -/-     | -/-      | 228/81  | 142/34 | 356/93  | 160/111 | 152/307 | 349/106 |
| ASYG284   | -/-     | -/-     | -/-      | -/-     | -/-     | -/-    | -/-     | -/-      | 241/95  | 118/32 | 21/62   | 163/115 | 100/256 | 248/83  |
| ASYG285   | -/-     | -/-     | -/-      | 276/220 | 75/113  | 37/120 | 254/77  | 580/66   | 316/74  | 153/25 | 546/134 | 277/191 | 265/348 | 477/151 |
| ASYG286   | -/-     | -/-     | -/-      | -/-     | -/-     | -/-    | -/-     | -/-      | 389/142 | 250/80 | 530/153 | 316/201 | 177/367 | 482/148 |
| ASYG287   | -/-     | -/-     | -/-      | -/-     | -/-     | -/-    | 446/158 | 1108/192 | 792/208 | 288/80 | 628/157 | 304/215 | 143/381 | 469/136 |
| ASYG288   | -/-     | -/-     | -/-      | -/-     | -/-     | -/-    | 199/46  | 700/107  | 260/76  | 178/51 | 319/88  | 202/143 | 138/276 | 295/98  |
| ASYG289   | -/-     | -/-     | -/-      | -/-     | -/-     | -/-    | -/-     | -/-      | 335/140 | 285/67 | 534/142 | 316/166 | 160/377 | 585/151 |
| ASYG291   | -/-     | -/-     | -/-      | -/-     | -/-     | -/-    | -/-     | -/-      | 224/78  | 200/37 | 325/84  | 159/131 | 86/258  | 256/83  |
| ASYG292   | -/-     | -/-     | -/-      | -/-     | -/-     | -/-    | -/-     | -/-      | 594/135 | 363/60 | 918/167 | 489/232 | 353/412 | 867/210 |
| ASYG293   | -/-     | -/-     | -/-      | -/-     | -/-     | -/-    | -/-     | -/-      | 384/124 | 314/56 | 529/194 | 289/196 | 157/310 | 469/148 |
| ASYG294   | -/-     | -/-     | -/-      | -/-     | -/-     | -/-    | 36/10   | 423/64   | 298/111 | 186/34 | 361/90  | 220/144 | 110/287 | 285/109 |
| ASYG470   | -/-     | -/-     | -/-      | 161/225 | 88/146  | 33/92  | 124/79  | 454/78   | 347/115 | 260/69 | 394/47  | 309/169 | 123/307 | 355/115 |
| ASYG471   | 606/218 | 739/235 | 1005/231 | 264/265 | 127/157 | 66/132 | 213/90  | 777/100  | 531/119 | 291/61 | 691/127 | 379/234 | 318/374 | 687/162 |
| ASYG472   | -/-     | -/-     | -/-      | -/-     | -/-     | -/-    | -/-     | -/-      | 384/128 | 328/62 | 571/115 | 316/194 | 228/349 | 524/118 |
| ASYG473   | -/-     | -/-     | -/-      | 114/2   | 92/141  | 23/0   | 107/78  | 483/77   | 278/101 | 260/49 | 380/94  | 206/161 | 99/311  | 331/117 |
| ASYG474   | -/-     | -/-     | -/-      | 146/220 | 47/162  | 20/0   | 145/83  | 360/90   | 292/122 | 251/72 | 385/119 | 242/170 | 86/327  | 325/88  |
| ASYG475   | -/-     | -/-     | -/-      | -/-     | -/-     | -/-    | -/-     | -/-      | 266/101 | 232/56 | 279/97  | 226/142 | 73/292  | 257/101 |
| ASYG476   | -/-     | -/-     | -/-      | 76/189  | 76/128  | 25/0   | 86/63   | 315/53   | 270/100 | 204/41 | 284/86  | 166/126 | 82/269  | 243/102 |

wild-type

B

|         |         |         |          |         |         |         |         |          |          |        |         |         |         |         |
|---------|---------|---------|----------|---------|---------|---------|---------|----------|----------|--------|---------|---------|---------|---------|
| ASY1118 | 657/268 | 899/277 | 1425/309 | 328/405 | 103/204 | 100/226 | 330/167 | 945/120  | 460/157  | 343/74 | 671/161 | 266/317 | 260/205 | 760/211 |
| ASY1119 | 578/229 | 591/246 | 821/216  | 313/294 | 115/179 | 54/136  | 251/102 | 711/96   | 485/145  | 277/70 | 645/153 | 393/207 | 262/380 | 607/142 |
| ASY1120 | 380/173 | 412/173 | 607/171  | 130/221 | 94/161  | 37/110  | 121/82  | 469/65   | 304/97   | 244/50 | 401/104 | 284/151 | 141/346 | 331/107 |
| ASYG308 | -/-     | -/-     | -/-      | -/-     | -/-     | -/-     | 370/63  | 1253/165 | 907/233  | 261/63 | 733/164 | 369/219 | 316/423 | 539/164 |
| ASYG309 | -/-     | -/-     | -/-      | -/-     | -/-     | -/-     | -/-     | -/-      | 203/80   | 77/45  | 344/93  | 204/131 | 138/269 | 316/96  |
| ASYG310 | -/-     | -/-     | -/-      | -/-     | -/-     | -/-     | -/-     | -/-      | 282/103  | 142/29 | 353/91  | 218/159 | 149/331 | 321/132 |
| ASYG311 | -/-     | -/-     | -/-      | -/-     | -/-     | -/-     | -/-     | -/-      | 318/103  | 207/60 | 399/129 | 279/168 | 131/310 | 343/124 |
| ASYG312 | -/-     | -/-     | -/-      | -/-     | -/-     | -/-     | -/-     | -/-      | 231/82   | 154/31 | 302/89  | 148/138 | 96/272  | 300/112 |
| ASYG313 | -/-     | -/-     | -/-      | 142/221 | 81/83   | 44/123  | 143/85  | 456/73   | 294/109  | 181/30 | 420/90  | 225/152 | 131/305 | 333/103 |
| ASYG314 | -/-     | -/-     | 559/232  | 235/270 | 67/183  | 18/0    | 217/111 | 476/125  | 420/159  | 327/94 | 502/143 | 355/215 | 105/347 | 390/135 |
| ASYG315 | -/-     | -/-     | -/-      | -/-     | -/-     | -/-     | -/-     | -/-      | 284/117  | 288/67 | 385/110 | 231/162 | 83/313  | 322/117 |
| ASYG316 | -/-     | -/-     | -/-      | -/-     | -/-     | -/-     | -/-     | -/-      | 198/84   | 138/35 | 276/63  | 132/122 | 75/215  | 190/68  |
| ASYG317 | -/-     | -/-     | -/-      | -/-     | -/-     | -/-     | 162/42  | 896/107  | 359/133  | 245/55 | 506/125 | 298/182 | 162/349 | 397/109 |
| ASYG318 | -/-     | -/-     | -/-      | 126/235 | 96/144  | 31/113  | 147/69  | 460/61   | 311/114  | 240/51 | 451/105 | 245/186 | 170/306 | 427/106 |
| ASYG484 | -/-     | -/-     | -/-      | -/-     | -/-     | -/-     | -/-     | -/-      | 369/144  | 223/80 | 449/116 | 310/224 | 196/332 | 442/131 |
| ASYG485 | -/-     | -/-     | -/-      | -/-     | -/-     | -/-     | 371/45  | 1216/114 | 1057/229 | 339/64 | 719/136 | 476/226 | 293/363 | 523/132 |
| ASYG486 | -/-     | -/-     | -/-      | -/-     | -/-     | -/-     | 176/74  | 472/115  | 360/136  | 345/72 | 517/132 | 332/202 | 103/353 | 396/138 |
| ASYG487 | -/-     | -/-     | -/-      | -/-     | -/-     | -/-     | -/-     | -/-      | 400/151  | 411/73 | 637/150 | 354/4   | 144/390 | 415/153 |
| ASYG488 | -/-     | -/-     | -/-      | -/-     | -/-     | -/-     | -/-     | -/-      | 267/143  | 225/75 | 365/145 | 254/225 | 99/533  | 257/105 |
| ASYG489 | -/-     | -/-     | -/-      | -/-     | -/-     | -/-     | -/-     | 521/93   | 353/119  | 310/52 | 599/114 | 322/189 | 176/368 | 449/135 |
| ASYG490 | -/-     | -/-     | -/-      | -/-     | -/-     | -/-     | 161/126 | 1072/140 | 689/204  | 299/56 | 489/117 | 273/201 | 184/366 | 462/117 |

swr1



# Supplementary Figure 1

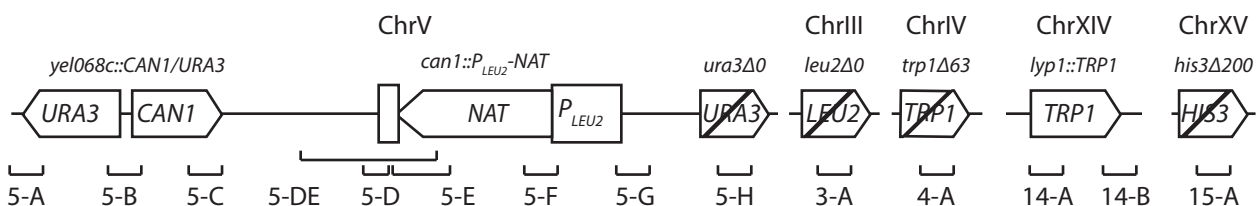

C

|         | 5-A     | 5-B     | 5-C     | 5-DE    | 5-D     | 5-E     | 5-F     | 5-G     | 5-H     | 3-A    | 4-A     | 14-A    | 14-B    | 15-A    |
|---------|---------|---------|---------|---------|---------|---------|---------|---------|---------|--------|---------|---------|---------|---------|
| ASY1112 | 411/197 | 433/210 | 545/202 | 374/303 | 97/151  | 72/160  | 317/137 | 49/131  | 262/105 | 201/61 | 551/135 | 273/183 | 191/356 | 426/131 |
| ASY1113 | 483/260 | 610/260 | 705/218 | 493/365 | 116/181 | 142/203 | 459/182 | 850/222 | 281/132 | 243/67 | 669/186 | 252/196 | 206/407 | 539/180 |
| ASY1114 | 279/153 | 320/166 | 385/140 | 234/257 | 54/106  | 50/155  | 246/125 | 421/153 | 202/86  | 172/42 | 391/86  | 210/124 | 99/301  | 282/100 |
| ASYG295 | -/-     | -/-     | -/-     | -/-     | -/-     | -/-     | -/-     | -/-     | 537/217 | 335/65 | 563/132 | 327/190 | 231/368 | 471/127 |
| ASYG296 | -/-     | -/-     | -/-     | -/-     | -/-     | -/-     | -/-     | -/-     | 579/180 | 216/52 | 547/106 | 333/206 | 188/330 | 383/110 |
| ASYG297 | -/-     | -/-     | -/-     | 346/231 | 93/107  | 64/136  | 302/87  | 482/58  | 292/105 | 190/36 | 549/121 | 268/181 | 179/321 | 437/123 |
| ASYG298 | -/-     | -/-     | -/-     | 400/311 | 84/151  | 66/169  | 344/96  | 527/57  | 318/111 | 200/42 | 613/121 | 329/188 | 247/339 | 473/136 |
| ASYG299 | -/-     | -/-     | -/-     | 249/265 | 97/146  | 53/129  | 230/95  | 504/63  | 294/102 | 239/50 | 493/103 | 293/172 | 164/332 | 414/110 |
| ASYG300 | -/-     | -/-     | -/-     | -/-     | -/-     | -/-     | 294/54  | 739/96  | 227/106 | 175/51 | 432/131 | 355/196 | 190/338 | 370/111 |
| ASYG301 | -/-     | -/-     | -/-     | -/-     | -/-     | -/-     | -/-     | -/-     | 64/90   | 87/22  | 97/62   | 22/60   | 24/165  | 178/81  |
| ASYG302 | -/-     | -/-     | -/-     | 180/189 | 489/371 | 132/193 | 431/150 | 826/87  | 263/89  | 196/46 | 525/98  | 297/146 | 194/310 | 403/121 |
| ASYG303 | -/-     | -/-     | -/-     | -/-     | -/-     | -/-     | -/-     | -/-     | 221/71  | 139/24 | 408/77  | 240/142 | 146/293 | 323/111 |
| ASYG306 | -/-     | -/-     | -/-     | -/-     | -/-     | -/-     | 127/77  | 280/78  | 217/88  | 182/69 | 359/115 | 216/173 | 114/291 | 263/105 |
| ASYG307 | -/-     | -/-     | -/-     | -/-     | -/-     | -/-     | -/-     | -/-     | 490/159 | 192/55 | 437/102 | 263/135 | 150/294 | 334/110 |
| ASYG477 | -/-     | -/-     | -/-     | -/-     | -/-     | -/-     | -/-     | 36/45   | 199/127 | 203/91 | 419/146 | 268/193 | 130/334 | 305/129 |
| ASYG478 | -/-     | -/-     | -/-     | -/-     | -/-     | -/-     | -/-     | 59/18   | 165/79  | 123/39 | 301/71  | 160/122 | 105/261 | 259/73  |
| ASYG479 | -/-     | -/-     | -/-     | -/-     | -/-     | -/-     | -/-     | -/-     | 354/119 | 154/27 | 381/80  | 225/127 | 116/259 | 303/88  |
| ASYG480 | -/-     | -/-     | -/-     | 423/268 | 124/122 | 66/152  | 431/112 | 438/52  | 368/120 | 180/32 | 516/126 | 206/141 | 147/261 | 347/101 |
| ASYG481 | -/-     | -/-     | -/-     | -/-     | -/-     | -/-     | 295/34  | 641/94  | 425/142 | 151/28 | 370/108 | 291/139 | 111/281 | 241/87  |
| ASYG482 | -/-     | -/-     | -/-     | -/-     | -/-     | -/-     | 158/34  | 530/69  | 306/101 | 132/23 | 286/70  | 175/121 | 103/258 | 258/77  |
| ASYG483 | -/-     | -/-     | -/-     | -/-     | -/-     | -/-     | 413/41  | 678/87  | 510/152 | 195/37 | 552/121 | 284/140 | 163/291 | 360/88  |

D

|         | 5-A     | 5-B     | 5-C     | 5-DE    | 5-D     | 5-E    | 5-F     | 5-G    | 5-H     | 3-A     | 4-A     | 14-A    | 14-B    | 15-A    |
|---------|---------|---------|---------|---------|---------|--------|---------|--------|---------|---------|---------|---------|---------|---------|
| ASY1202 | 445/151 | 479/173 | 715/180 | 389/241 | 90/105  | 62/142 | 285/95  | 505/51 | 267/90  | 132/25  | 433/104 | 209/159 | 194/296 | 449/127 |
| ASY1203 | 442/176 | 456/240 | 753/213 | 304/273 | 64/139  | 46/154 | 255/120 | 516/72 | 298/105 | 140/31  | 510/323 | 252/171 | 177/368 | 367/142 |
| ASY1204 | 579/187 | 705/199 | 923/202 | 493/298 | 89/149  | 87/168 | 394/122 | 661/61 | 377/99  | 176/40  | 672/141 | 283/191 | 279/380 | 660/161 |
| ASYG320 | -/-     | -/-     | -/-     | -/-     | -/-     | -/-    | -/-     | -/-    | 281/108 | 222/39  | 497/137 | 246/161 | 122/302 | 350/121 |
| ASYG321 | -/-     | -/-     | -/-     | -/-     | -/-     | -/-    | -/-     | -/-    | 353/100 | 171/62  | 550/136 | 298/182 | 158/340 | 389/135 |
| ASYG322 | -/-     | -/-     | -/-     | 300/222 | 118/119 | 56/122 | 269/86  | 505/40 | 439/109 | 157/41  | 637/123 | 340/164 | 292/319 | 492/139 |
| ASYG323 | -/-     | -/-     | -/-     | -/-     | -/-     | -/-    | 23/45   | 481/54 | 381/102 | 159/34  | 565/113 | 299/194 | 283/337 | 489/117 |
| ASYG324 | -/-     | -/-     | -/-     | 250/233 | 64/131  | 27/102 | 185/69  | 501/62 | 336/95  | 126/40  | 520/116 | 325/335 | 253/190 | 408/123 |
| ASYG325 | -/-     | -/-     | -/-     | -/-     | -/-     | -/-    | -/-     | -/-    | 370/113 | 98/25   | 309/70  | 179/113 | 129/241 | 239/93  |
| ASYG326 | -/-     | -/-     | -/-     | -/-     | -/-     | -/-    | -/-     | -/-    | 281/92  | 118/28  | 456/89  | 249/156 | 207/331 | 378/99  |
| ASYG327 | 527/166 | -/-     | -/-     | 341/298 | 130/178 | 45/144 | 303/92  | 633/80 | 445/150 | 302/54  | 645/113 | 366/215 | 290/407 | 586/169 |
| ASYG328 | -/-     | -/-     | -/-     | -/-     | -/-     | -/-    | -/-     | -/-    | 248/93  | 188/38  | 438/110 | 245/174 | 164/335 | 322/114 |
| ASYG329 | -/-     | -/-     | -/-     | -/-     | -/-     | -/-    | -/-     | -/-    | 383/146 | 227/53  | 703/184 | 402/235 | 218/411 | 661/188 |
| ASYG330 | -/-     | -/-     | -/-     | -/-     | -/-     | -/-    | -/-     | -/-    | 414/181 | 346/70  | 626/150 | 414/235 | 173/372 | 454/157 |
| ASYG331 | -/-     | -/-     | 373/127 | 120/160 | 78/106  | 17/0   | 103/57  | 295/65 | 410/139 | 185/34  | 451/133 | 247/140 | 121/306 | 385/144 |
| ASYG332 | -/-     | -/-     | -/-     | -/-     | -/-     | -/-    | -/-     | -/-    | 319/115 | 278/59  | 466/139 | 354/205 | 151/356 | 370/122 |
| ASYG333 | 610/246 | -/-     | 821/260 | 507/368 | 118/198 | 74/175 | 440/114 | 614/90 | 486/161 | 290/70  | 705/169 | 492/253 | 286/437 | 584/164 |
| ASYG547 | -/-     | -/-     | 593/190 | 425/340 | 126/184 | 65/165 | 440/128 | 544/83 | 531/122 | 280/56  | 800/148 | 460/215 | 278/396 | 560/153 |
| ASYG548 | -/-     | -/-     | -/-     | 193/278 | 113/153 | 62/137 | 173/103 | 520/87 | 346/118 | 287/42  | 506/130 | 291/183 | 118/332 | 400/111 |
| ASYG549 | 281/133 | 439/71  | 421/154 | 175/186 | 68/126  | 23/0   | 152/68  | 385/66 | 276/90  | 205/36  | 367/99  | 256/155 | 131/311 | 314/104 |
| ASYG550 | -/-     | -/-     | -/-     | -/-     | -/-     | -/-    | -/-     | -/-    | 331/109 | 486/101 | 416/113 | 252/167 | 103/315 | 319/113 |
| ASYG551 | -/-     | -/-     | -/-     | -/-     | -/-     | -/-    | -/-     | -/-    | 334/115 | 357/44  | 545/124 | 255/184 | 141/341 | 462/167 |
| ASYG554 | -/-     | -/-     | 567/171 | 314/280 | 109/147 | 72/140 | 336/107 | 529/87 | 389/119 | 296/53  | 622/140 | 301/200 | 208/371 | 498/125 |
| ASYG555 | -/-     | -/-     | -/-     | -/-     | -/-     | -/-    | -/-     | -/-    | 327/79  | 152/32  | 377/90  | 231/107 | 151/270 | 330/86  |
| ASYG319 | 212/135 | 323/86  | 406/117 | 105/172 | 66/91   | 8/0    | 76/50   | 295/54 | 226/77  | 166/51  | 289/80  | 170/129 | 102/253 | 244/89  |

*mrc1*

*mrc1 swr1*

# Supplementary Figure 1

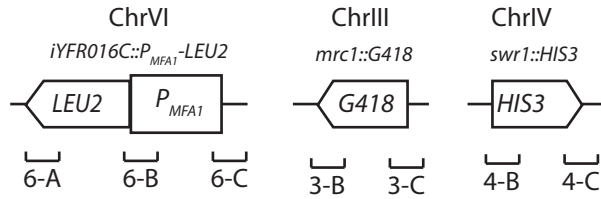

**E**

|         | 6-A     | 6-B     | 6-C     | 3-B  | 3-C  | 4-B  | 4-C  |
|---------|---------|---------|---------|------|------|------|------|
| ASY987  | 320/210 | 406/119 | 258/330 | n.a. | n.a. | n.a. | n.a. |
| ASY988  | 512/183 | 764/134 | 595/315 | n.a. | n.a. | n.a. | n.a. |
| ASY989  | 275/156 | 392/96  | 252/241 | n.a. | n.a. | n.a. | n.a. |
| ASYG281 | 279/144 | 377/98  | 305/284 | n.a. | n.a. | n.a. | n.a. |
| ASYG282 | 208/90  | 298/69  | 264/191 | n.a. | n.a. | n.a. | n.a. |
| ASYG283 | 432/168 | 554/116 | 515/312 | n.a. | n.a. | n.a. | n.a. |
| ASYG284 | 245/136 | 364/95  | 273/251 | n.a. | n.a. | n.a. | n.a. |
| ASYG285 | 556/194 | 635/118 | 534/271 | n.a. | n.a. | n.a. | n.a. |
| ASYG286 | 486/249 | 607/153 | 400/334 | n.a. | n.a. | n.a. | n.a. |
| ASYG287 | 433/222 | 565/132 | 390/319 | n.a. | n.a. | n.a. | n.a. |
| ASYG288 | 362/136 | 384/89  | 244/238 | n.a. | n.a. | n.a. | n.a. |
| ASYG289 | 470/210 | 617/147 | 521/308 | n.a. | n.a. | n.a. | n.a. |
| ASYG291 | 319/148 | 357/97  | 287/246 | n.a. | n.a. | n.a. | n.a. |
| ASYG292 | 835/259 | 994/163 | 798/350 | n.a. | n.a. | n.a. | n.a. |
| ASYG293 | 479/173 | 653/149 | 613/306 | n.a. | n.a. | n.a. | n.a. |
| ASYG294 | 339/178 | 489/118 | 445/278 | n.a. | n.a. | n.a. | n.a. |
| ASYG470 | 347/168 | 520/121 | 411/299 | n.a. | n.a. | n.a. | n.a. |
| ASYG471 | 747/247 | 906/163 | 690/325 | n.a. | n.a. | n.a. | n.a. |
| ASYG472 | 523/201 | 698/137 | 449/306 | n.a. | n.a. | n.a. | n.a. |
| ASYG473 | 402/172 | 503/138 | 453/307 | n.a. | n.a. | n.a. | n.a. |
| ASYG474 | 289/158 | 437/130 | 233/282 | n.a. | n.a. | n.a. | n.a. |
| ASYG475 | 273/175 | 409/114 | 274/274 | n.a. | n.a. | n.a. | n.a. |
| ASYG476 | 279/147 | 424/113 | 321/284 | n.a. | n.a. | n.a. | n.a. |

**H**

|         |         |          |         |      |      |         |         |
|---------|---------|----------|---------|------|------|---------|---------|
| ASY1118 | 803/288 | 1066/209 | 971/414 | n.a. | n.a. | 340/192 | 407/120 |
| ASY1119 | 678/237 | 797/154  | 566/318 | n.a. | n.a. | 331/178 | 468/154 |
| ASY1120 | 378/193 | 493/127  | 372/269 | n.a. | n.a. | 230/136 | 258/109 |
| ASYG308 | 637/236 | 732/164  | 563/343 | n.a. | n.a. | 387/192 | 385/173 |
| ASYG309 | 300/156 | 423/106  | 426/283 | n.a. | n.a. | 183/119 | 184/77  |
| ASYG310 | 440/206 | 574/119  | 540/319 | n.a. | n.a. | 210/128 | 220/75  |
| ASYG311 | 340/192 | 484/140  | 368/309 | n.a. | n.a. | 198/123 | 225/97  |
| ASYG312 | 337/189 | 504/127  | 491/331 | n.a. | n.a. | 120/77  | 138/52  |
| ASYG313 | 352/190 | 542/135  | 410/282 | n.a. | n.a. | 224/129 | 259/92  |
| ASYG314 | 410/233 | 550/160  | 332/329 | n.a. | n.a. | 283/180 | 340/174 |
| ASYG315 | 323/146 | 478/118  | 338/2   | n.a. | n.a. | 212/122 | 299/132 |
| ASYG316 | 277/138 | 404/99   | 404/275 | n.a. | n.a. | 151/98  | 173/64  |
| ASYG317 | 410/199 | 562/137  | 490/299 | n.a. | n.a. | 272/110 | 332/108 |
| ASYG318 | 446/190 | 619/129  | 472/297 | n.a. | n.a. | 556/213 | 582/172 |
| ASYG484 | 471/198 | 547/138  | 430/312 | n.a. | n.a. | 305/125 | 354/115 |
| ASYG485 | 632/217 | 756/142  | 500/292 | n.a. | n.a. | 382/149 | 541/170 |
| ASYG486 | 424/209 | 529/149  | 372/319 | n.a. | n.a. | 257/159 | 354/170 |
| ASYG487 | 518/267 | 696/169  | 496/350 | n.a. | n.a. | 323/178 | 356/192 |
| ASYG488 | 335/0   | 427/166  | 311/515 | n.a. | n.a. | 208/194 | 229/122 |
| ASYG489 | 513/199 | 646/148  | 451/295 | n.a. | n.a. | 347/148 | 442/136 |
| ASYG490 | 498/199 | 628/164  | 521/331 | n.a. | n.a. | 339/143 | 354/148 |

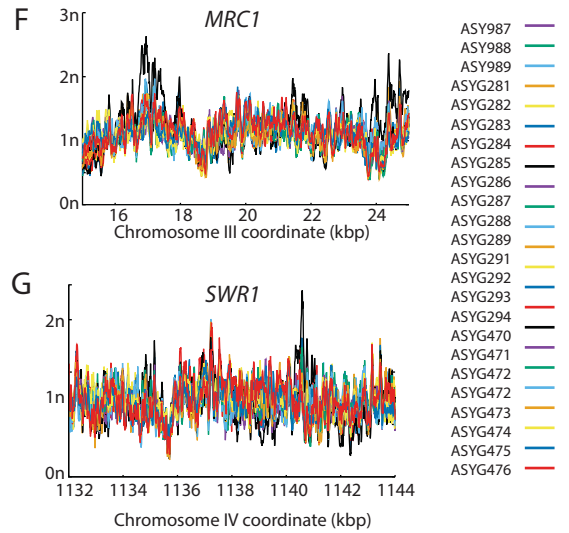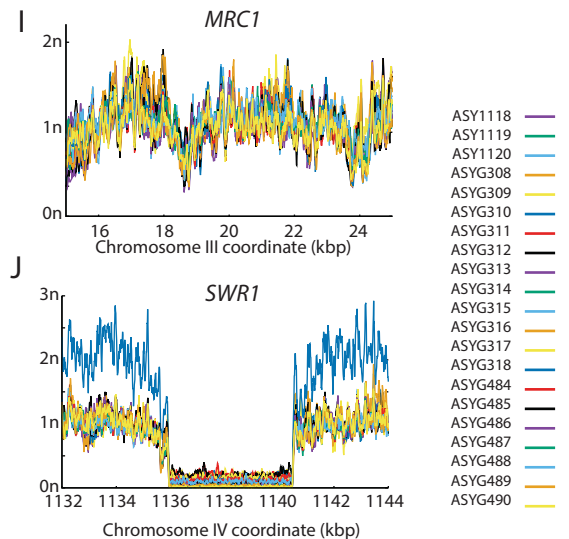

# Supplementary Figure 1

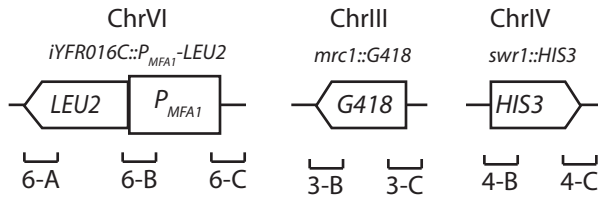

**K**

|         | 6-A     | 6-B     | 6-C     | 3-B     | 3-C      | 4-B  | 4-C  |
|---------|---------|---------|---------|---------|----------|------|------|
| ASY1112 | 445/191 | 529/133 | 475/352 | 357/84  | 879/182  | n.a. | n.a. |
| ASY1113 | 571/265 | 733/173 | 508/365 | 471/160 | 1137/215 | n.a. | n.a. |
| ASY1114 | 375/161 | 375/104 | 337/277 | 250/79  | 631/150  | n.a. | n.a. |
| ASYG295 | 520/220 | 630/147 | 511/344 | 500/119 | 952/192  | n.a. | n.a. |
| ASYG296 | 537/184 | 521/119 | 490/331 | 372/85  | 899/155  | n.a. | n.a. |
| ASYG297 | 494/198 | 612/104 | 543/276 | 371/66  | 852/157  | n.a. | n.a. |
| ASYG298 | 485/190 | 586/11  | 550/312 | 431/78  | 953/178  | n.a. | n.a. |
| ASYG299 | 431/193 | 555/143 | 471/318 | 360/87  | 833/171  | n.a. | n.a. |
| ASYG300 | 411/184 | 484/128 | 413/321 | 339/95  | 632/138  | n.a. | n.a. |
| ASYG301 | 299/170 | 277/119 | 370/255 | 140/27  | 713/130  | n.a. | n.a. |
| ASYG302 | 423/205 | 529/119 | 548/305 | 309/11  | 954/168  | n.a. | n.a. |
| ASYG303 | 385/157 | 441/101 | 410/287 | 246/98  | 819/120  | n.a. | n.a. |
| ASYG306 | 261/164 | 376/116 | 265/302 | 241/90  | 502/105  | n.a. | n.a. |
| ASYG307 | 299/164 | 425/121 | 310/260 | 302/90  | 496/117  | n.a. | n.a. |
| ASYG477 | 347/216 | 448/142 | 346/309 | 284/66  | 594/119  | n.a. | n.a. |
| ASYG478 | 236/108 | 309/74  | 251/252 | 230/43  | 402/89   | n.a. | n.a. |
| ASYG479 | 333/134 | 388/98  | 385/251 | 268/56  | 694/128  | n.a. | n.a. |
| ASYG480 | 343/136 | 386/72  | 486/255 | 334/52  | 883/151  | n.a. | n.a. |
| ASYG481 | 307/115 | 401/93  | 303/249 | 297/64  | 489/111  | n.a. | n.a. |
| ASYG482 | 297/127 | 362/85  | 333/236 | 223/50  | 503/114  | n.a. | n.a. |
| ASYG483 | 397/148 | 501/98  | 333/236 | 389/77  | 813/147  | n.a. | n.a. |

**L**

*MRC1*

**M**

*SWR1*

**N**

|         |         |         |         |          |          |         |         |
|---------|---------|---------|---------|----------|----------|---------|---------|
| ASY1202 | 536/194 | 536/194 | 541/298 | 352/55   | 829/138  | 275/153 | 309/77  |
| ASY1203 | 523/183 | 523/183 | 519/323 | 345/82   | 962/178  | 279/168 | 321/93  |
| ASY1204 | 676/223 | 676/223 | 722/320 | 1409/204 | 414/77   | 502/177 | 398/101 |
| ASYG320 | 387/192 | 387/192 | 395/307 | 360/88   | 603/148  | 232/148 | 297/122 |
| ASYG321 | 454/199 | 454/199 | 479/304 | 380/95   | 807/192  | 275/170 | 319/104 |
| ASYG322 | 482/169 | 482/169 | 479/283 | 551/94   | 632/131  | 332/136 | 417/113 |
| ASYG323 | 479/189 | 479/189 | 506/252 | 497/103  | 764/165  | 283/152 | 358/109 |
| ASYG324 | 579/226 | 579/226 | 518/323 | 384/97   | 698/148  | 291/149 | 359/100 |
| ASYG325 | 324/128 | 324/128 | 292/221 | 457/92   | 704/167  | 148/91  | 227/75  |
| ASYG326 | 427/148 | 427/148 | 384/257 | 282/59   | 496/116  | 229/125 | 308/87  |
| ASYG327 | 673/232 | 673/232 | 583/322 | 573/108  | 822/175  | 375/157 | 498/129 |
| ASYG328 | 428/201 | 428/201 | 406/307 | 607/158  | 333/88   | 213/136 | 273/109 |
| ASYG329 | 708/290 | 708/290 | 678/387 | 484/113  | 1036/220 | 361/194 | 467/165 |
| ASYG330 | 637/256 | 637/256 | 475/364 | 456/121  | 835/197  | 326/155 | 429/162 |
| ASYG331 | 405/156 | 405/156 | 336/267 | 320/80   | 450/98   | 289/153 | 425/160 |
| ASYG332 | 441/173 | 441/173 | 369/310 | 405/119  | 621/157  | 252/131 | 346/156 |
| ASYG333 | 704/276 | 704/276 | 660/383 | 539/140  | 1072/229 | 704/297 | 803/254 |
| ASYG547 | 563/190 | 563/190 | 584/318 | 659/138  | 933/177  | 348/170 | 408/156 |
| ASYG548 | 514/184 | 514/184 | 471/324 | 372/86   | 831/167  | 236/127 | 349/138 |
| ASYG549 | 330/146 | 330/146 | 295/263 | 359/86   | 402/97   | 178/114 | 269/107 |
| ASYG550 | 380/167 | 380/167 | 345/299 | 644/149  | 891/221  | 226/127 | 292/115 |
| ASYG551 | 528/224 | 528/224 | 561/345 | 357/91   | 816/143  | 273/139 | 363/126 |
| ASYG554 | 585/182 | 585/182 | 508/287 | 491/98   | 863/168  | 312/155 | 413/147 |
| ASYG555 | 373/139 | 373/139 | 332/255 | 251/65   | 643/160  | 222/105 | 271/93  |
| ASYG319 | 273/143 | 273/143 | 278/275 | 271/68   | 426/98   | 156/100 | 187/73  |

**O**

*MRC1*

**P**

*SWR1*

**Supplementary Figure 1. Identification of the engineered chromosomal features in uGCR assay strains by WGS. A-E, H, K, N.** For each junction, the evidence in the paired-end sequencing data is reported. The number preceding the slash is the number of junction-defining read pairs (those for which one read maps to one side of the junction and the other read maps to the other side of the junction). The number following the slash is the number of junction-sequencing reads (those that can be aligned to derive the sequence of the junction). “-/-” indicates a junction that could have been observed but was not observed, which is typically due to a GCR-related deletion. Note that some sequences are short enough that some read pairs span multiple junctions, e.g. junction 5-DE contains read pairs that span both junctions 5-D and 5-E. **F, G, I, J, L-P.** Read-depth analysis of the regions including *MRC1* and *SWRI*, indicating that the expected deletions were observed for strains of each relevant genotype. In some cases, GCR-associated chromosomal rearrangements increase the copy number of sequences adjacent to the deletion to 2n.

Supplementary Figure 2

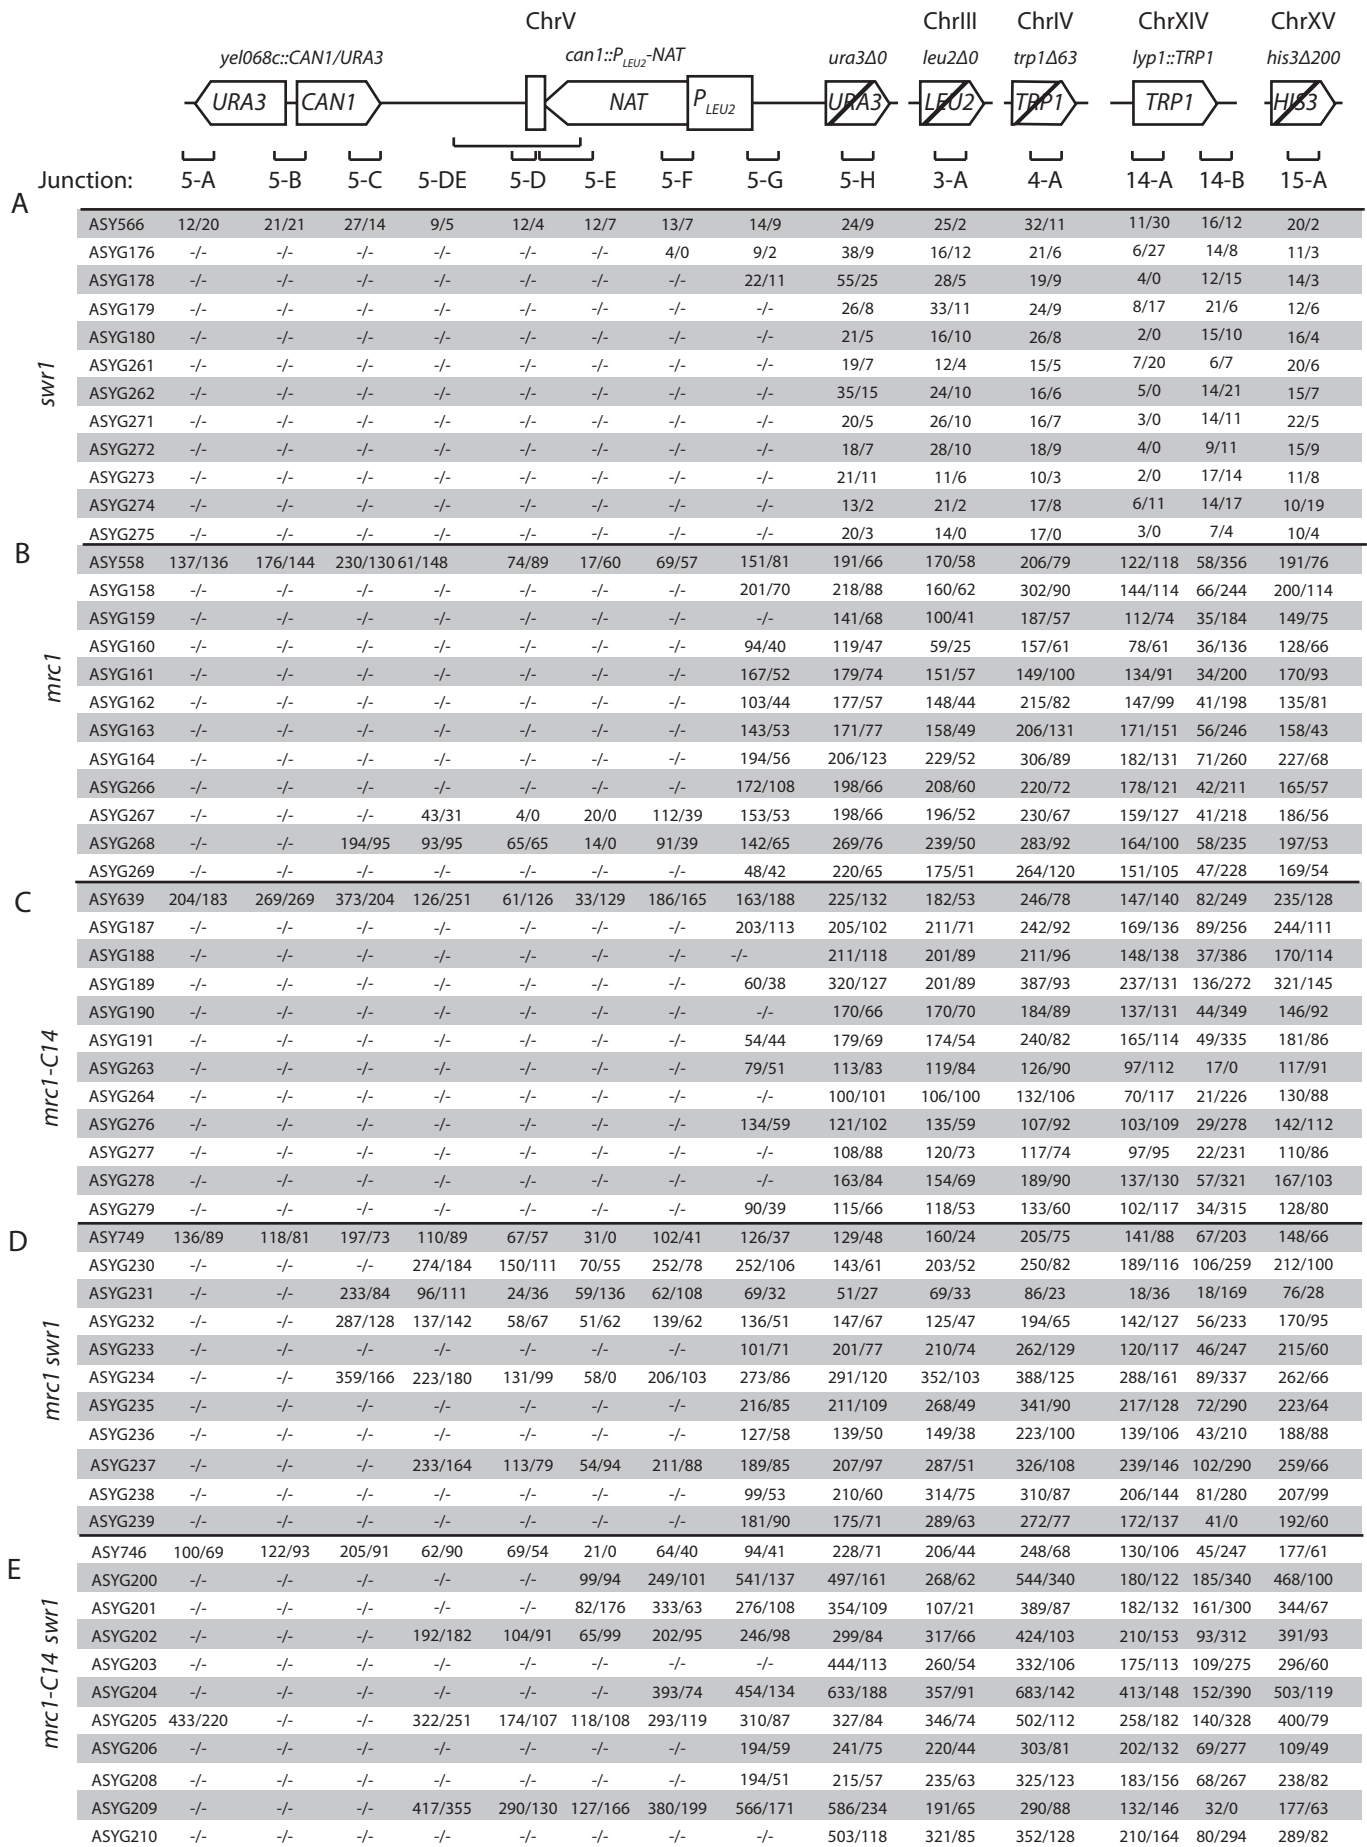

# Supplementary Figure 2

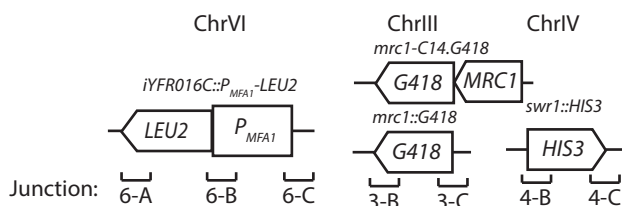

**F**

|             |         |       |       |       |      |      |       |       |
|-------------|---------|-------|-------|-------|------|------|-------|-------|
| <i>swr1</i> | ASYG566 | 19/8  | 26/10 | 13/15 | n.a. | n.a. | 9/9   | 14/4  |
|             | ASYG176 | 22/6  | 24/6  | 23/6  | n.a. | n.a. | 12/8  | 11/1  |
|             | ASYG178 | 24/14 | 23/11 | 13/20 | n.a. | n.a. | 16/12 | 10/1  |
|             | ASYG179 | 24/5  | 16/9  | 14/10 | n.a. | n.a. | 19/12 | 13/18 |
|             | ASYG180 | 18/12 | 25/5  | 18/11 | n.a. | n.a. | 21/8  | 11/9  |
|             | ASYG261 | 22/10 | 16/5  | 13/16 | n.a. | n.a. | 6/6   | 12/6  |
|             | ASYG262 | 23/19 | 22/16 | 22/20 | n.a. | n.a. | 13/8  | 12/17 |
|             | ASYG271 | 22/12 | 35/10 | 16/17 | n.a. | n.a. | 10/9  | 14/8  |
|             | ASYG272 | 29/15 | 22/6  | 29/18 | n.a. | n.a. | 19/10 | 17/15 |
|             | ASYG273 | 11/11 | 20/9  | 17/20 | n.a. | n.a. | 10/8  | 13/13 |
|             | ASYG274 | 15/9  | 35/6  | 20/18 | n.a. | n.a. | 8/7   | 10/7  |
|             | ASYG275 | 7/5   | 18/9  | 12/18 | n.a. | n.a. | 8/10  | 9/8   |

**G**

|             |         |         |         |         |         |         |      |      |
|-------------|---------|---------|---------|---------|---------|---------|------|------|
| <i>mrc1</i> | ASYG558 | 176/98  | 253/78  | 137/185 | 189/70  | 238/62  | n.a. | n.a. |
|             | ASYG158 | 229/134 | 310/106 | 193/186 | 236/124 | 311/105 | n.a. | n.a. |
|             | ASYG159 | 169/80  | 212/63  | 163/176 | 130/64  | 200/70  | n.a. | n.a. |
|             | ASYG160 | 182/76  | 206/72  | 183/98  | 135/59  | 216/64  | n.a. | n.a. |
|             | ASYG161 | 177/111 | 248/85  | 218/132 | 184/87  | 217/92  | n.a. | n.a. |
|             | ASYG162 | 195/128 | 312/103 | 208/134 | 200/99  | 208/83  | n.a. | n.a. |
|             | ASYG163 | 253/162 | 284/98  | 253/173 | 192/91  | 318/104 | n.a. | n.a. |
|             | ASYG164 | 316/129 | 322/138 | 270/165 | 257/73  | 289/86  | n.a. | n.a. |
|             | ASYG266 | 233/118 | 297/85  | 202/187 | 208/63  | 226/59  | n.a. | n.a. |
|             | ASYG267 | 247/117 | 296/66  | 214/155 | 196/57  | 239/77  | n.a. | n.a. |
|             | ASYG268 | 241/122 | 297/99  | 232/152 | 244/80  | 208/68  | n.a. | n.a. |
|             | ASYG269 | 190/112 | 266/91  | 193/128 | 297/65  | 201/63  | n.a. | n.a. |

**H**

|                 |         |         |         |         |         |         |      |      |
|-----------------|---------|---------|---------|---------|---------|---------|------|------|
| <i>mrc1-C14</i> | ASYG639 | 294/173 | 310/125 | 321/185 | 271/102 | 416/156 | n.a. | n.a. |
|                 | ASYG187 | 294/166 | 332/114 | 313/169 | 257/90  | 341/131 | n.a. | n.a. |
|                 | ASYG188 | 216/148 | 277/98  | 175/353 | 206/97  | 206/102 | n.a. | n.a. |
|                 | ASYG189 | 216/148 | 374/131 | 318/155 | 464/87  | 387/124 | n.a. | n.a. |
|                 | ASYG190 | 186/131 | 210/82  | 165/282 | 181/90  | 212/82  | n.a. | n.a. |
|                 | ASYG191 | 243/150 | 288/122 | 176/303 | 206/83  | 232/92  | n.a. | n.a. |
|                 | ASYG263 | 126/148 | 183/95  | 91/264  | 112/92  | 135/96  | n.a. | n.a. |
|                 | ASYG264 | 81/96   | 142/91  | 79/189  | 116/85  | 106/77  | n.a. | n.a. |
|                 | ASYG276 | 154/140 | 176/68  | 128/252 | 142/84  | 163/64  | n.a. | n.a. |
|                 | ASYG277 | 119/132 | 175/81  | 84/259  | 92/65   | 115/112 | n.a. | n.a. |
|                 | ASYG278 | 221/163 | 271/106 | 195/323 | 221/110 | 278/118 | n.a. | n.a. |
|                 | ASYG279 | 164/121 | 202/105 | 157/294 | 201/87  | 178/98  | n.a. | n.a. |

**I**

|                  |         |         |         |         |         |         |         |         |
|------------------|---------|---------|---------|---------|---------|---------|---------|---------|
| <i>mrc1 swr1</i> | ASY749  | 198/96  | 238/66  | 193/160 | 166/51  | 231/65  | 143/66  | 99/68   |
|                  | ASYG230 | 297/167 | 335/109 | 307/219 | 314/69  | 387/103 | 176/86  | 141/119 |
|                  | ASYG231 | 179/107 | 193/63  | 305/160 | 104/21  | 443/103 | 120/42  | 62/105  |
|                  | ASYG232 | 238/145 | 260/75  | 268/163 | 194/61  | 349/85  | 175/52  | 96/104  |
|                  | ASYG233 | 234/188 | 303/92  | 258/206 | 224/70  | 279/92  | 204/100 | 108/132 |
|                  | ASYG234 | 366/192 | 455/140 | 410/225 | 408/104 | 452/106 | 301/103 | 174/126 |
|                  | ASYG235 | 323/156 | 426/142 | 409/247 | 259/85  | 389/100 | 257/90  | 162/123 |
|                  | ASYG236 | 171/125 | 266/74  | 258/150 | 162/47  | 310/89  | 178/77  | 84/90   |
|                  | ASYG237 | 617/241 | 794/236 | 678/548 | 321/83  | 431/97  | 224/83  | 151/128 |
|                  | ASYG238 | 270/127 | 370/135 | 310/155 | 287/58  | 383/92  | 465/126 | 286/158 |
|                  | ASYG239 | 302/177 | 437/94  | 363/236 | 245/63  | 401/122 | 189/86  | 108/169 |

**J**

|                      |         |         |         |         |         |         |         |         |
|----------------------|---------|---------|---------|---------|---------|---------|---------|---------|
| <i>mrc1-C14 swr1</i> | ASY746  | 221/126 | 252/85  | 160/177 | 206/56  | 203/72  | 199/93  | 168/122 |
|                      | ASYG200 | 571/183 | 676/179 | 643/222 | 356/77  | 647/184 | 565/155 | 572/222 |
|                      | ASYG201 | 372/166 | 423/119 | 383/187 | 310/55  | 592/110 | 520/106 | 384/155 |
|                      | ASYG202 | 426/191 | 562/119 | 530/259 | 402/94  | 541/136 | 321/115 | 229/149 |
|                      | ASYG203 | 303/112 | 307/80  | 300/167 | 314/59  | 319/68  | 272/84  | 201/106 |
|                      | ASYG204 | 601/246 | 588/164 | 602/271 | 606/111 | 531/144 | 595/188 | 428/211 |
|                      | ASYG205 | 513/213 | 569/141 | 511/291 | 456/100 | 540/161 | 354/120 | 276/159 |
|                      | ASYG206 | 274/156 | 335/86  | 307/202 | 258/67  | 322/124 | 172/91  | 179/133 |
|                      | ASYG208 | 297/161 | 392/104 | 371/238 | 273/68  | 324/88  | 205/85  | 166/115 |
|                      | ASYG209 | 209/128 | 294/84  | 237/174 | 193/76  | 210/93  | 143/94  | 122/111 |
|                      | ASYG210 | 308/153 | 374/94  | 362/195 | 342/94  | 307/110 | 362/178 | 268/188 |

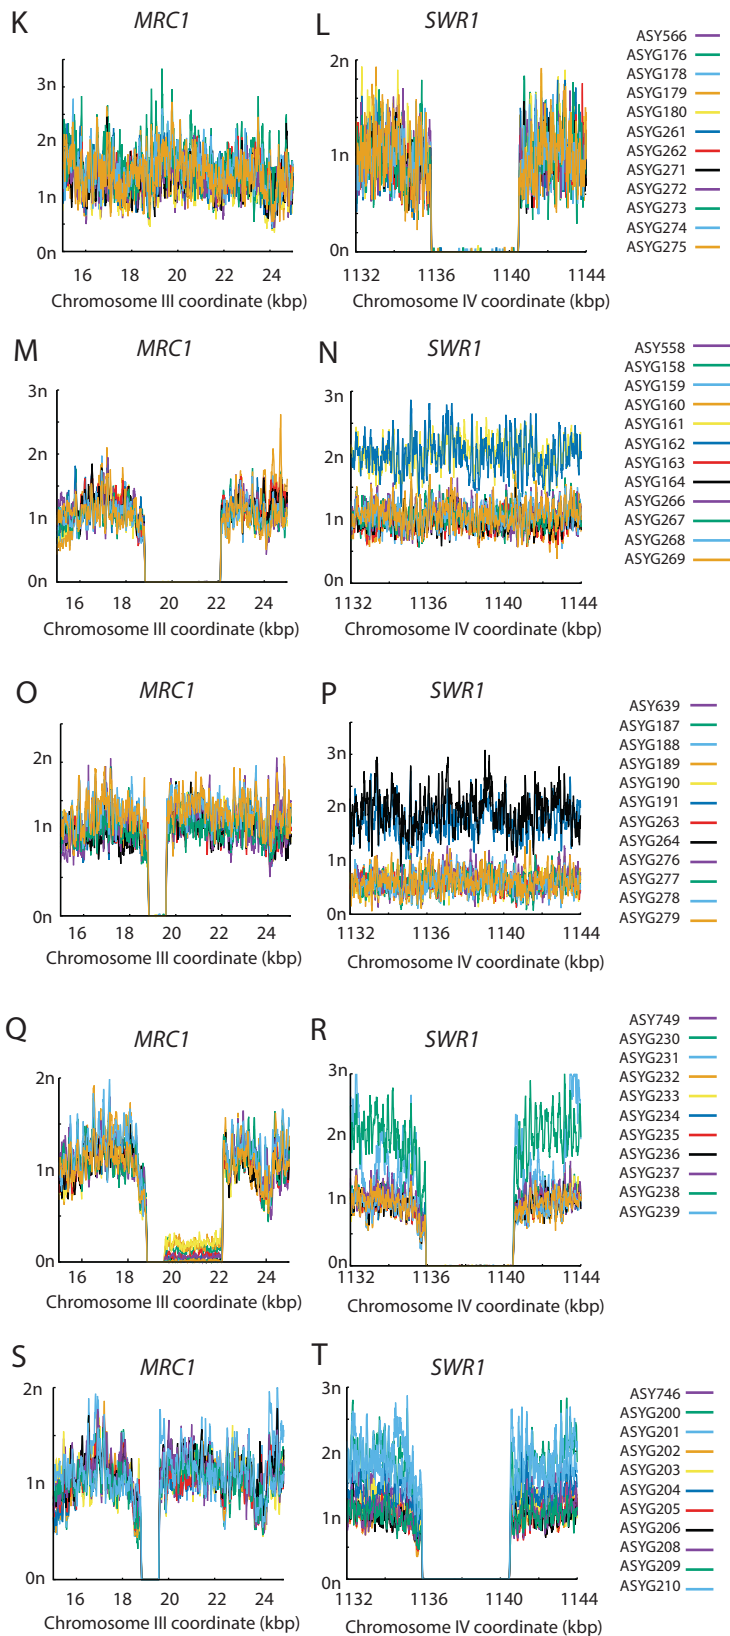

**Supplementary Figure 2. Identification of the engineered chromosomal features in sGCR assay strains by WGS. A-J.** Evidence for each engineered junction displayed as in Supplementary Fig. 1. **K-T.** Read-depth analysis of the *MRC1* and *SWRI*-containing chromosomal regions displayed as in Supplementary Fig. 1.



Supplementary Figure 3.

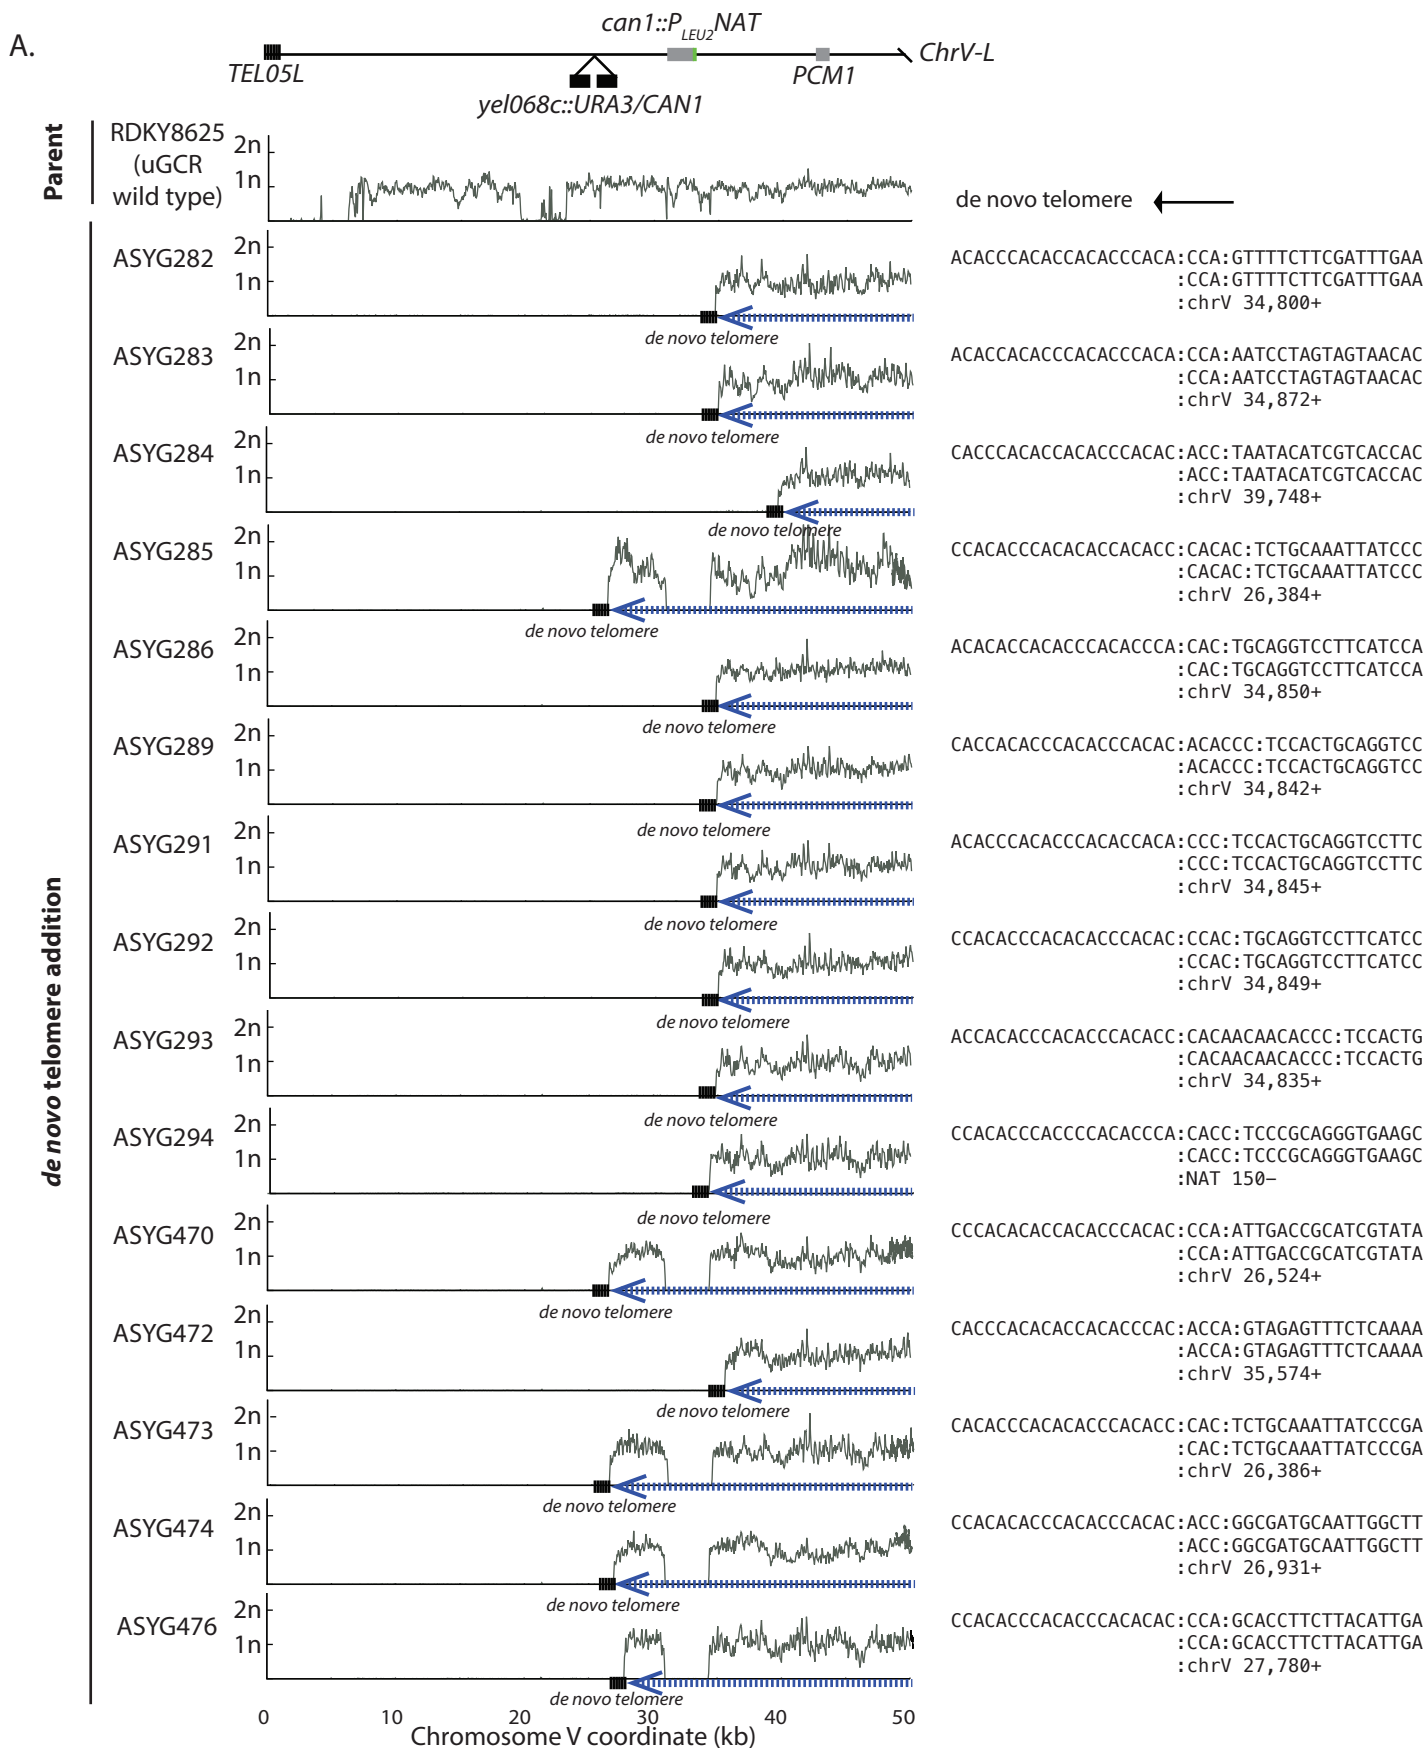



Supplementary Figure 3.

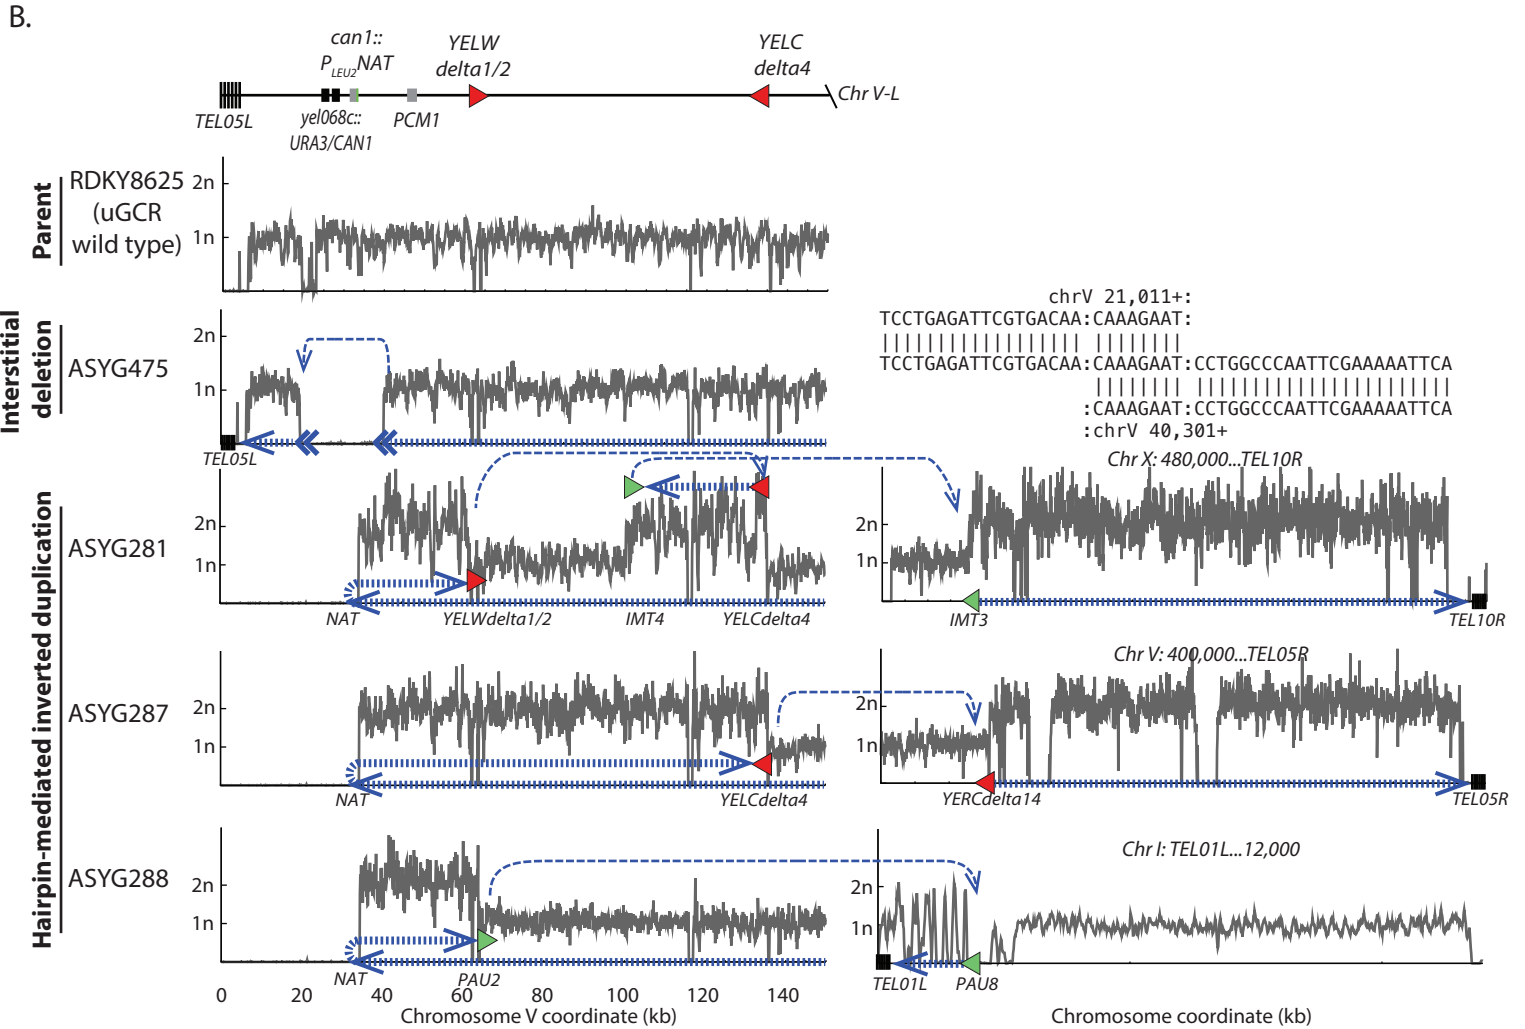

**Supplementary Figure 3. Analysis of wild-type GCRs isolated in the uGCR assay.** Analysis of *de novo* telomere additions (A), interstitial deletions and hairpin-mediated inverted duplications (B) isolated from a wild-type uGCR parental strain (RDKY8625). Copy-number analysis of the sequenced parental strain and GCR-containing strains shows that all GCRs include deletion of the *CAN1/URA3*-containing portion of chromosome V L (left) and either duplication of a terminal region of a target chromosome or addition of a *de novo* telomere or an interstitial deletion whose junction sequences can be identified (right). The thick-hashed blue arrow indicates sequences within the GCR; the thin dashed blue arrow indicates connectivity between portions of the GCR that map to different regions of the reference chromosome(s). Multi-copy sequences involved in GCR-related HR events are shown as triangles; red triangles are Ty-related homologies and green triangles are other homologies.



Supplementary Figure 4.

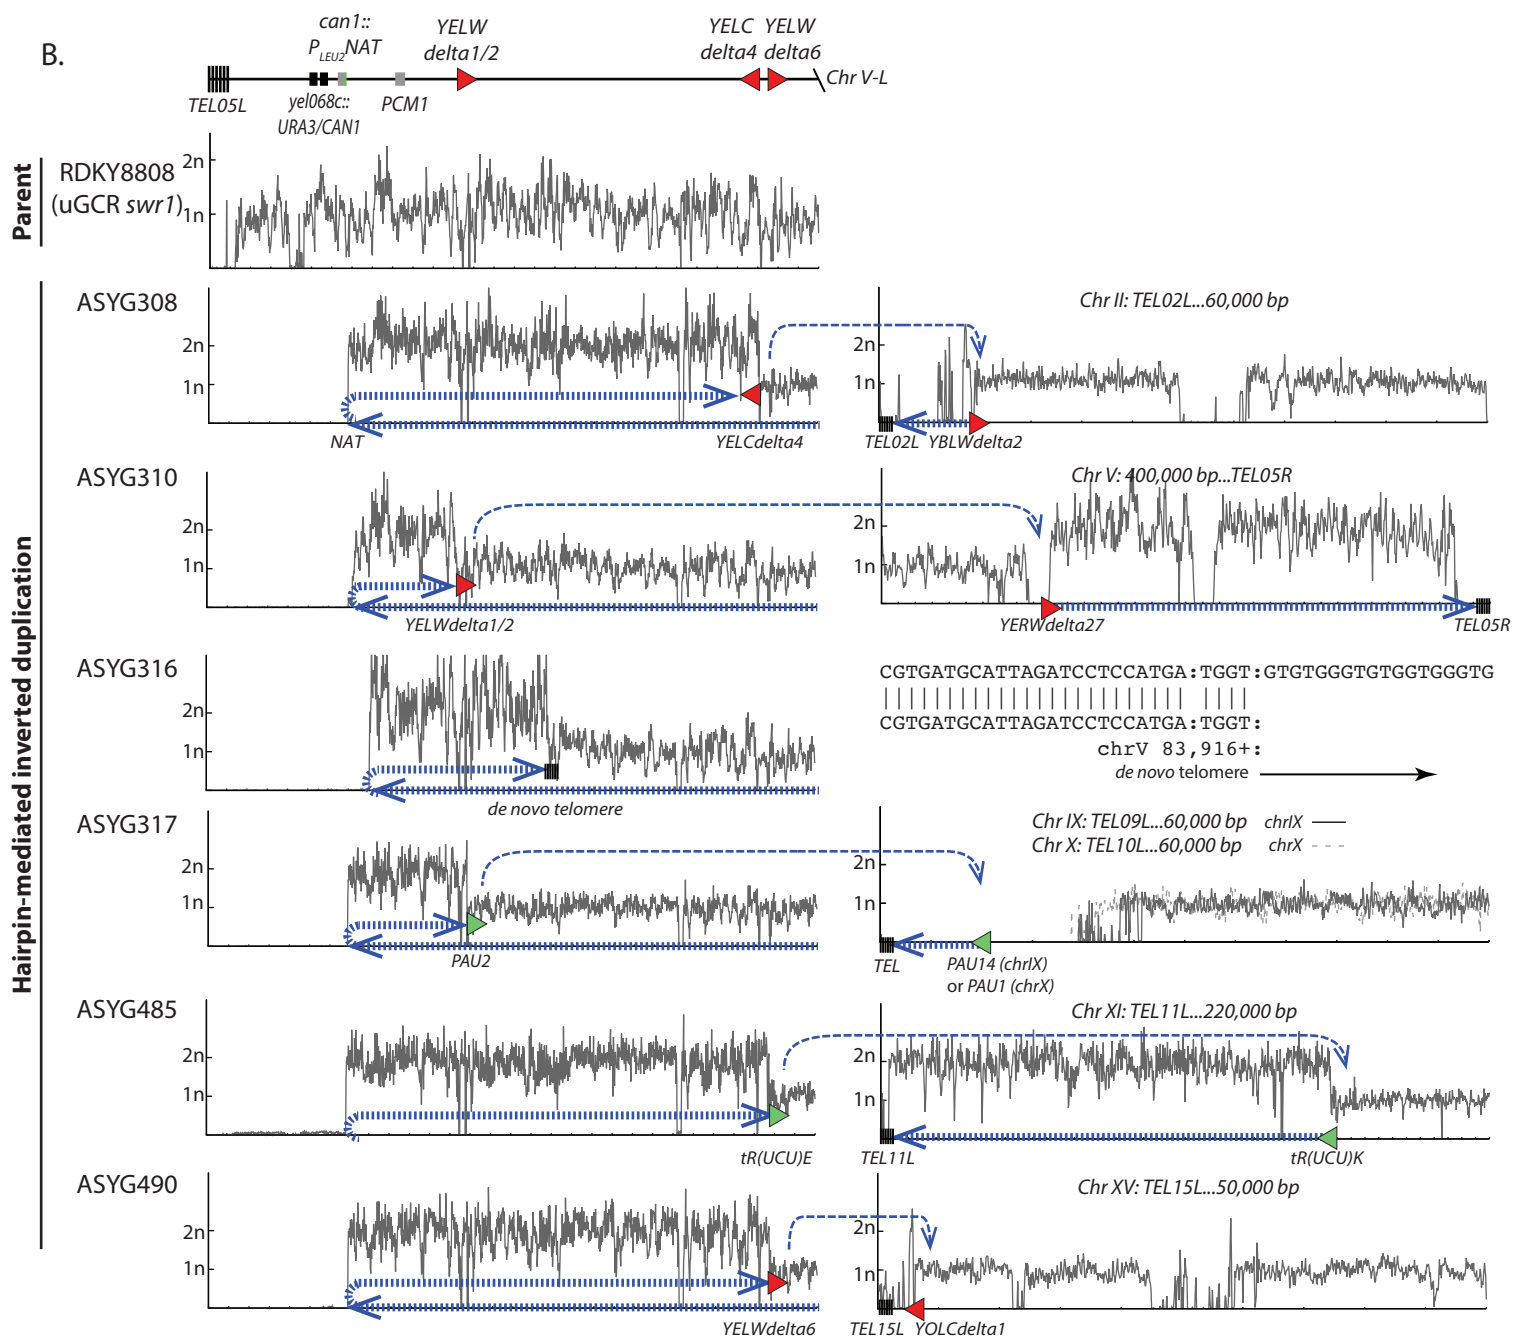

Supplementary Figure 4.

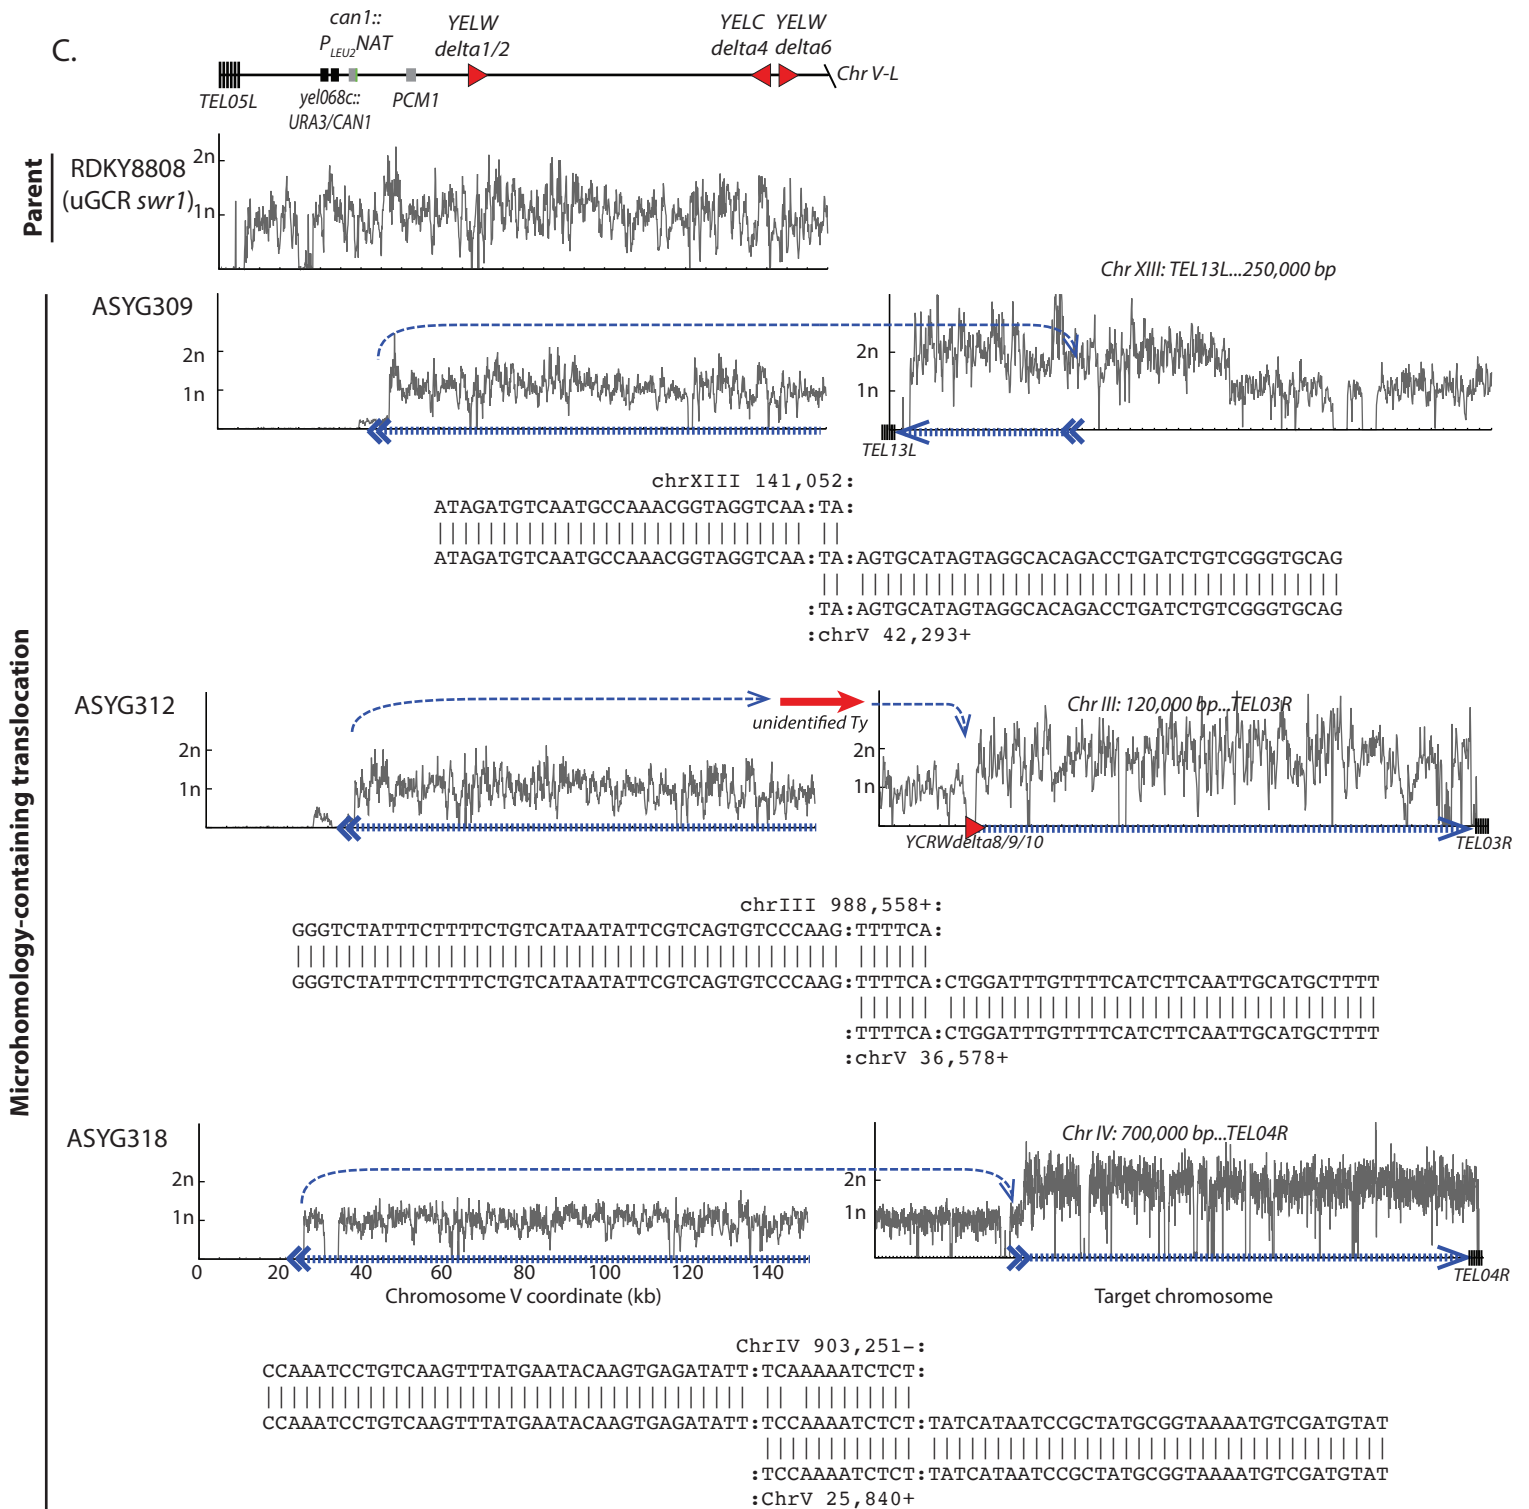

**Supplementary Figure 4. Analysis of *swr1Δ* GCRs isolated in the uGCR assay.** GCRs derived from a *swr1Δ* uGCR parent strain (RDKY8808) are depicted as described in Supplementary Fig. 3. Observed rearrangements include *de novo* telomere addition-mediated GCRs and interstitial deletions (**A**); hairpin-mediated inverted duplications (**B**); and microhomology-containing translocations (**C**). When more than one GCR is present, the second rearrangement is shown with green arrows.

Supplementary Figure 5.

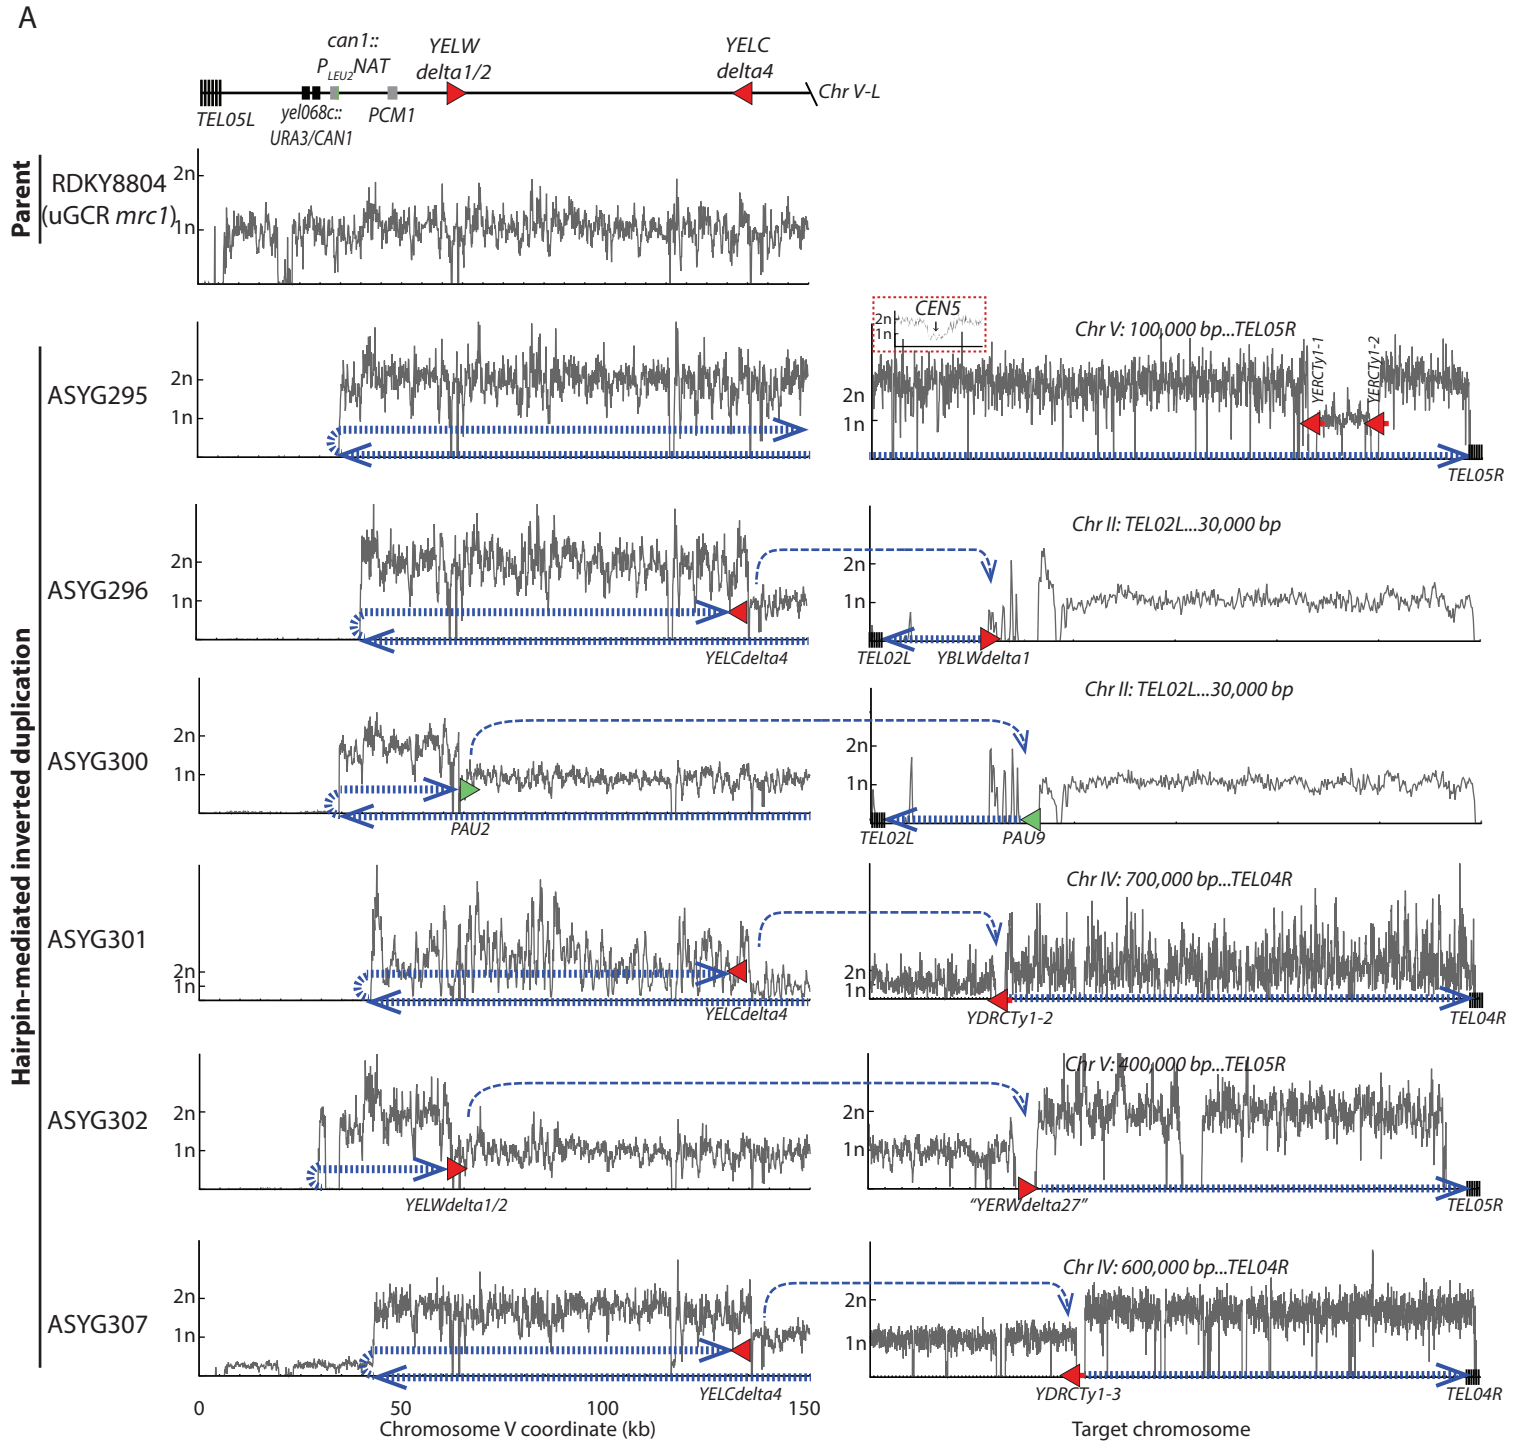

Supplementary Figure 5.

B.

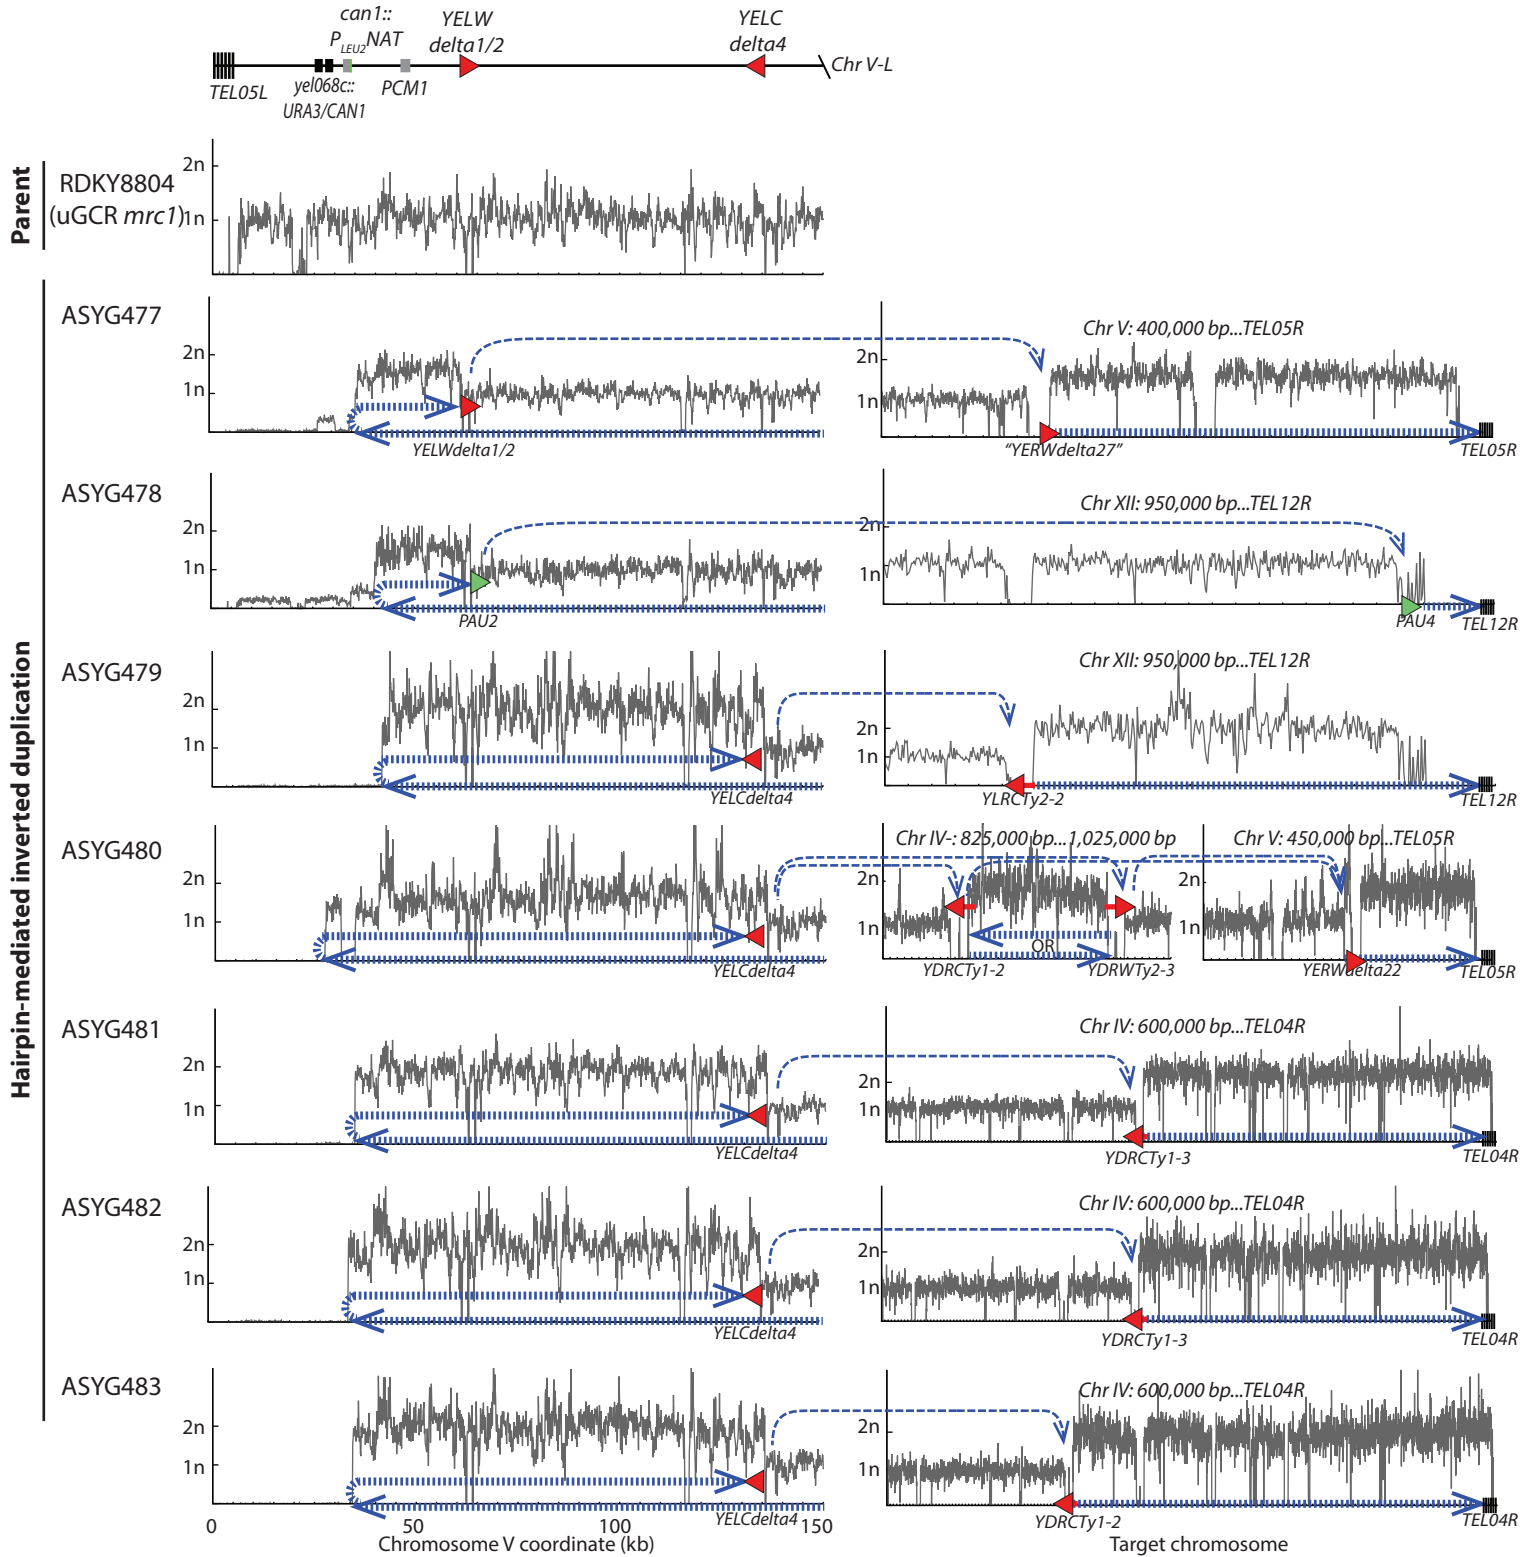

Supplementary Figure 5.

C

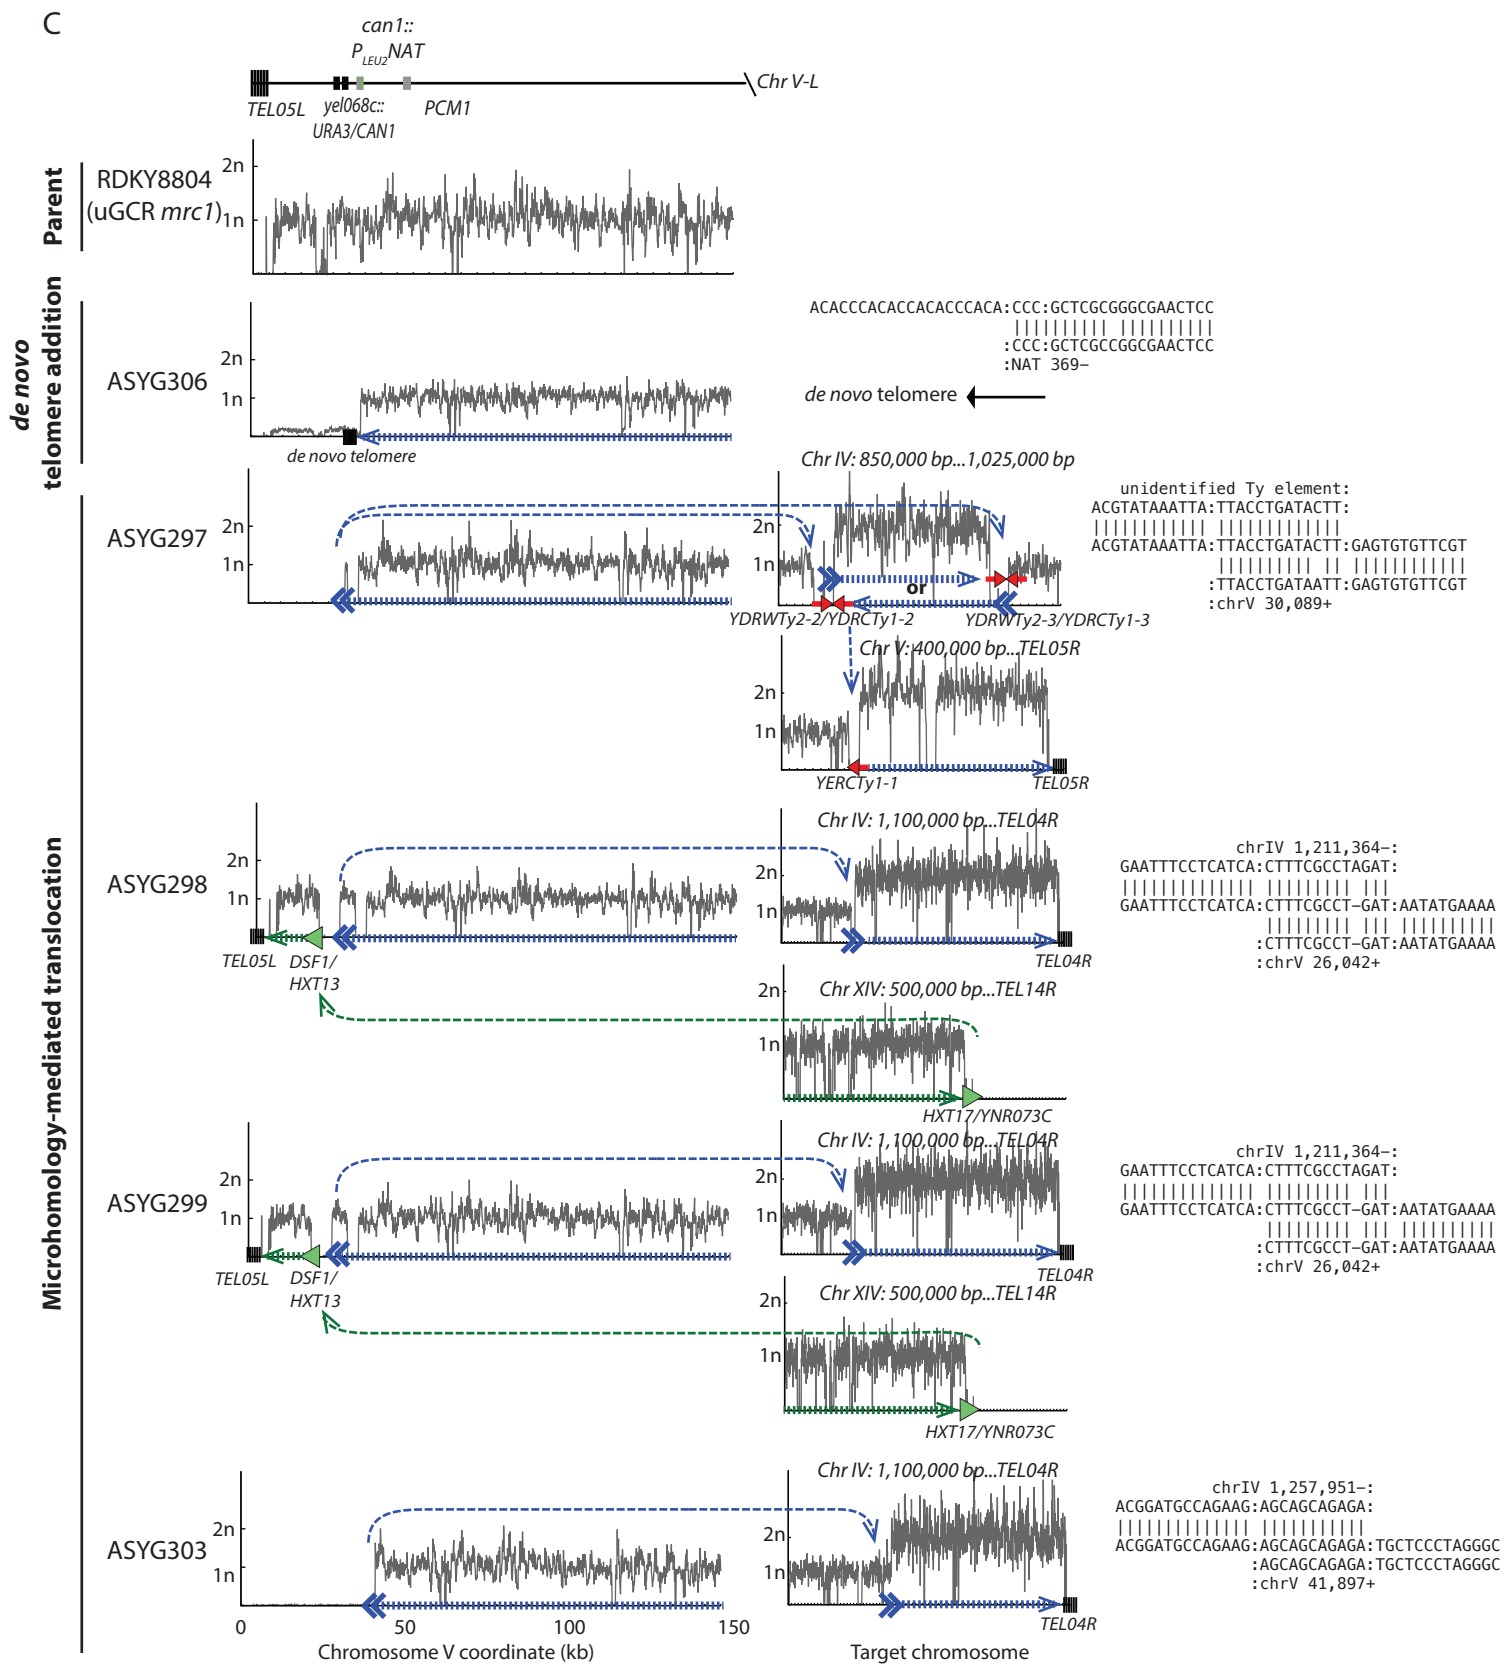



**Supplementary Figure 5. Analysis of *mrc1Δ* GCRs isolated in the uGCR assay.** GCRs derived from an *mrc1Δ* uGCR parent strain (RDKY8804) are depicted as described in Supplementary Fig. 3. Observed rearrangements include hairpin-mediated inverted duplications (**A and B**); and *de novo* telomere addition-mediated GCRs and microhomology-containing translocations (**C**). When more than one GCR is present, the second rearrangement is shown with green arrows.

Supplementary Figure 6.

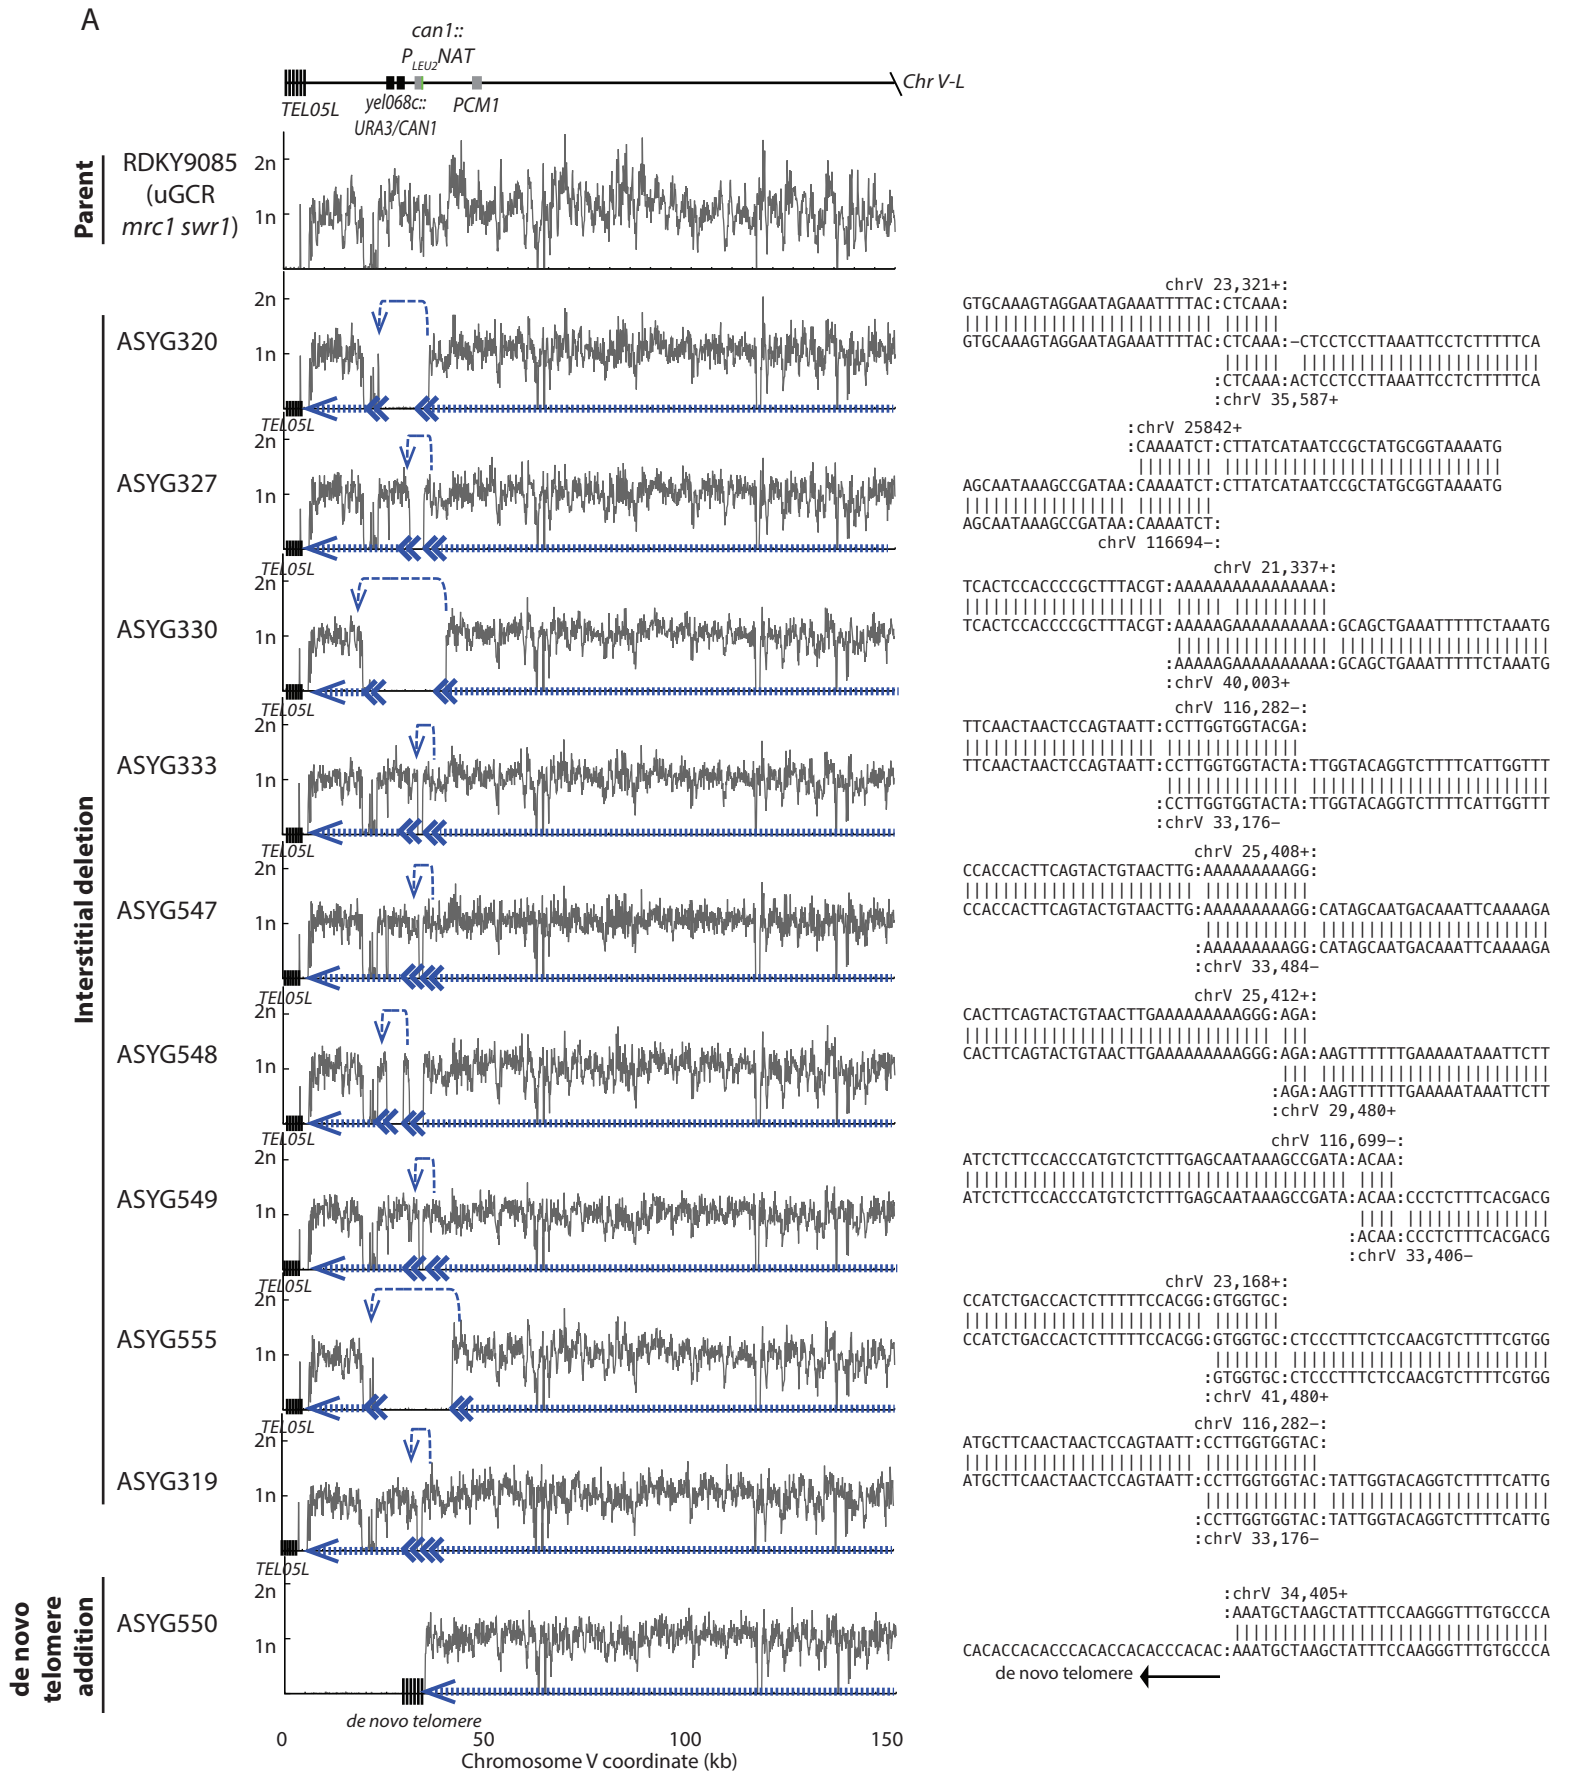

Supplementary Figure 6.

B

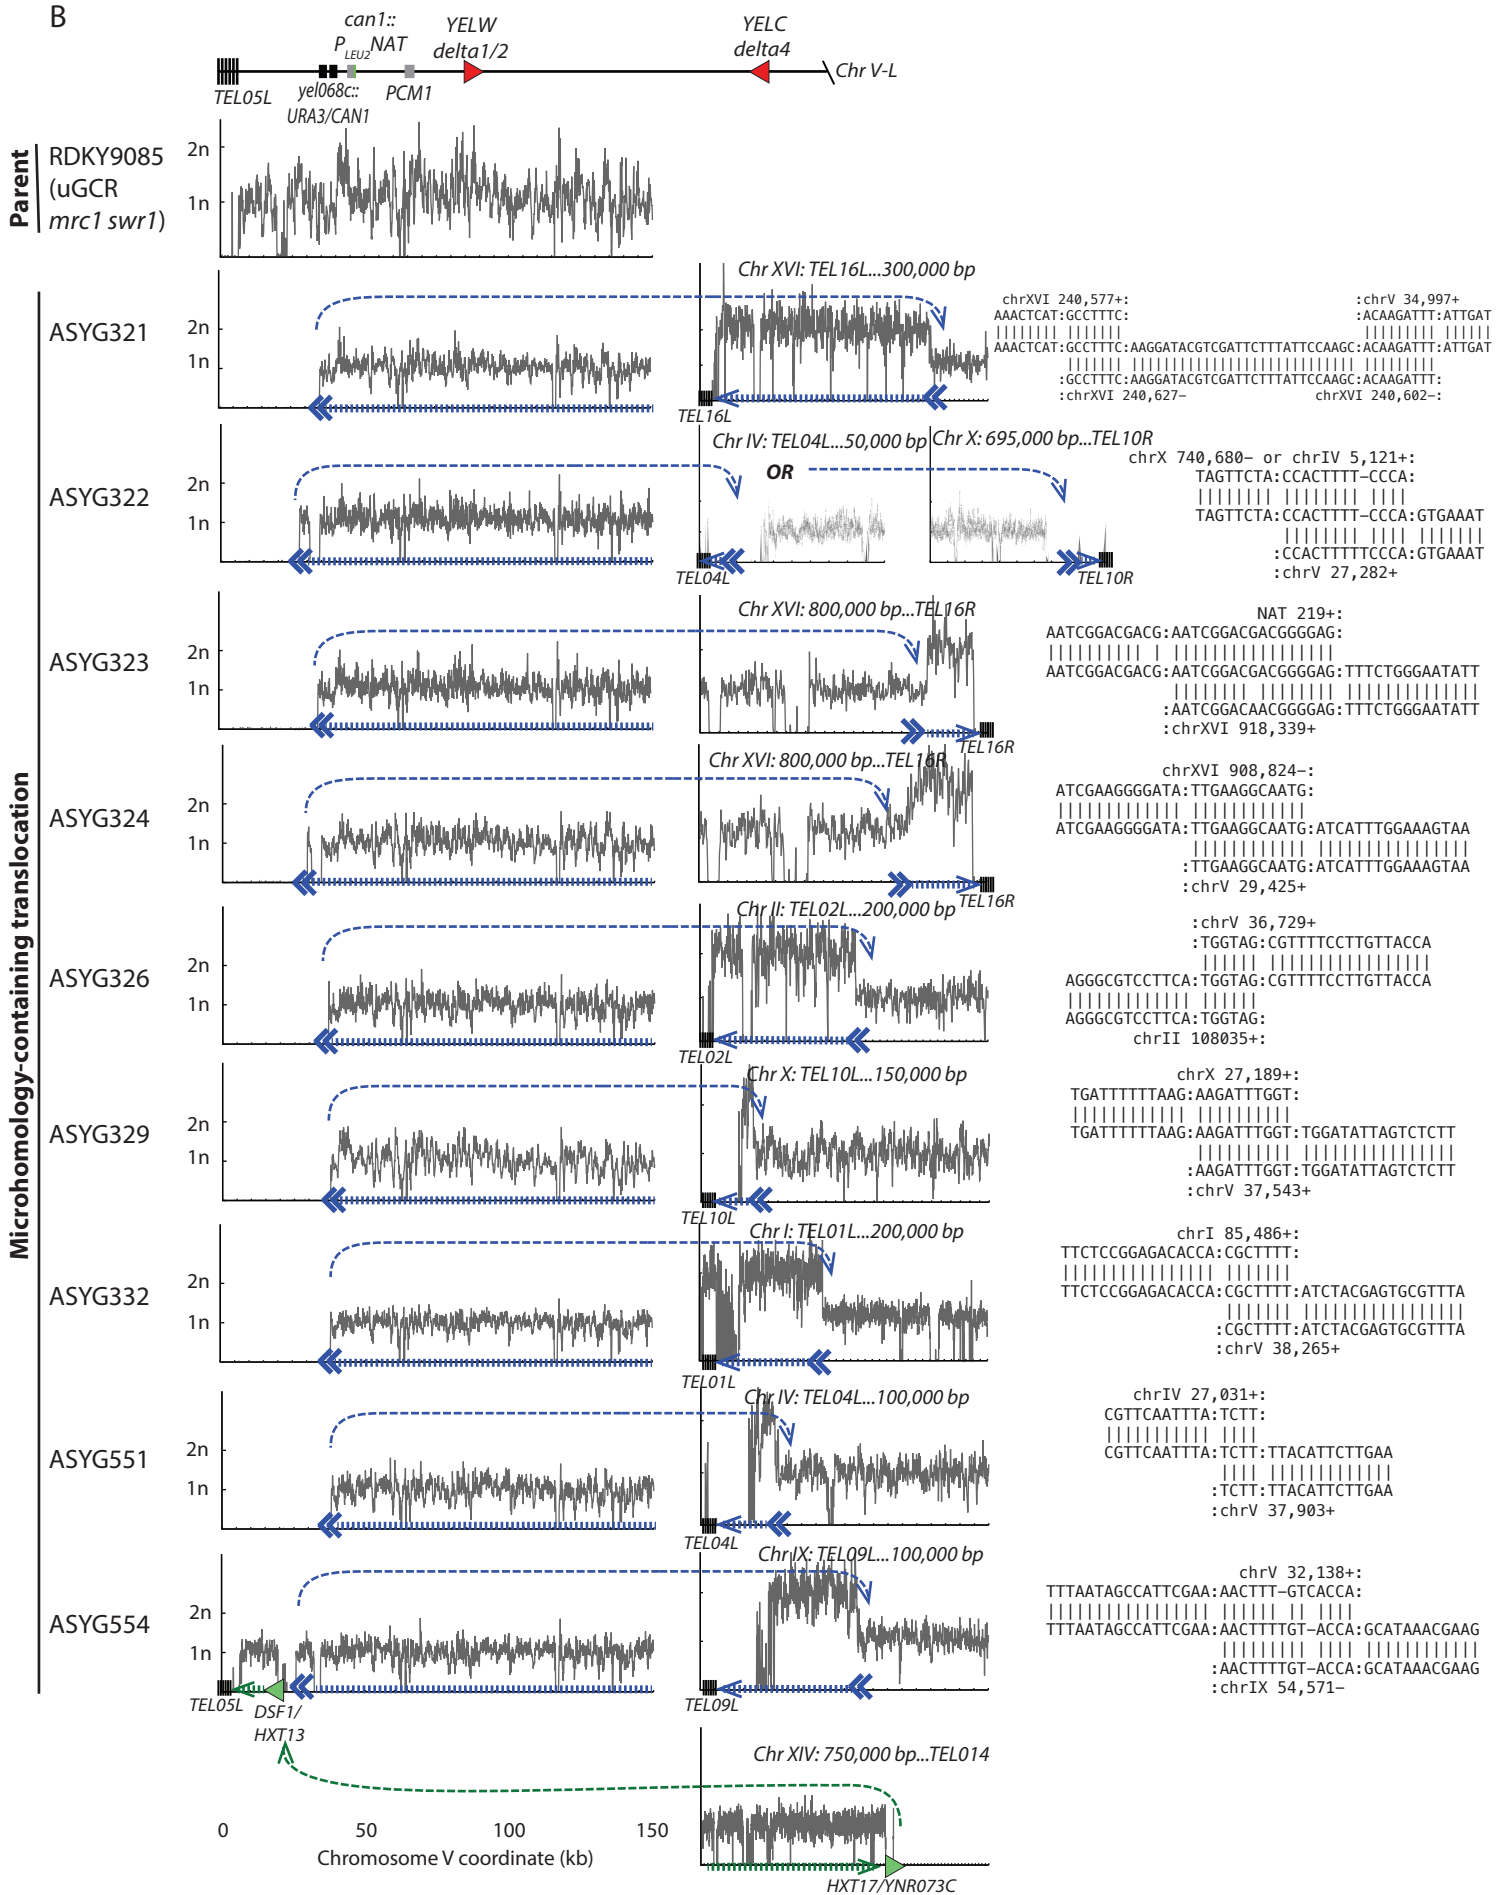

Supplementary Figure 6.

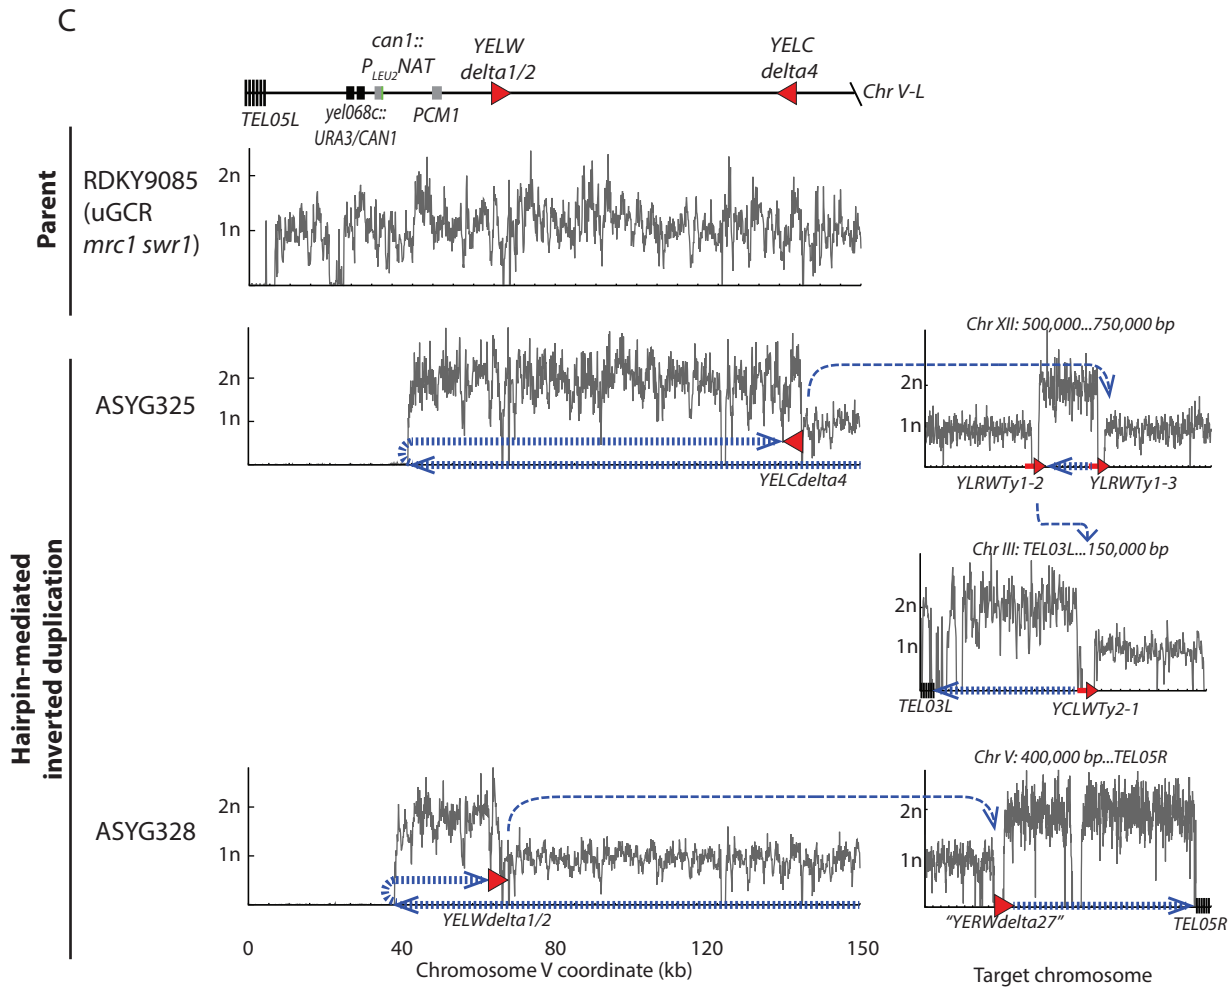

**Supplementary Figure 6. Analysis of *mrc1Δ swr1Δ* GCRs isolated in the uGCR assay.** GCRs derived from an *mrc1Δ swr1Δ* uGCR parent strain (RDKY9085) are depicted as described in Supplementary Fig. 3. Observed rearrangements include *de novo* telomere addition-mediated GCRs and interstitial deletions (**A**); microhomology-containing translocations (**B**); and hairpin-mediated inverted duplications (**C**). When more than one GCR is present, the second rearrangement is shown with green arrows.

Supplementary Figure 7.

A

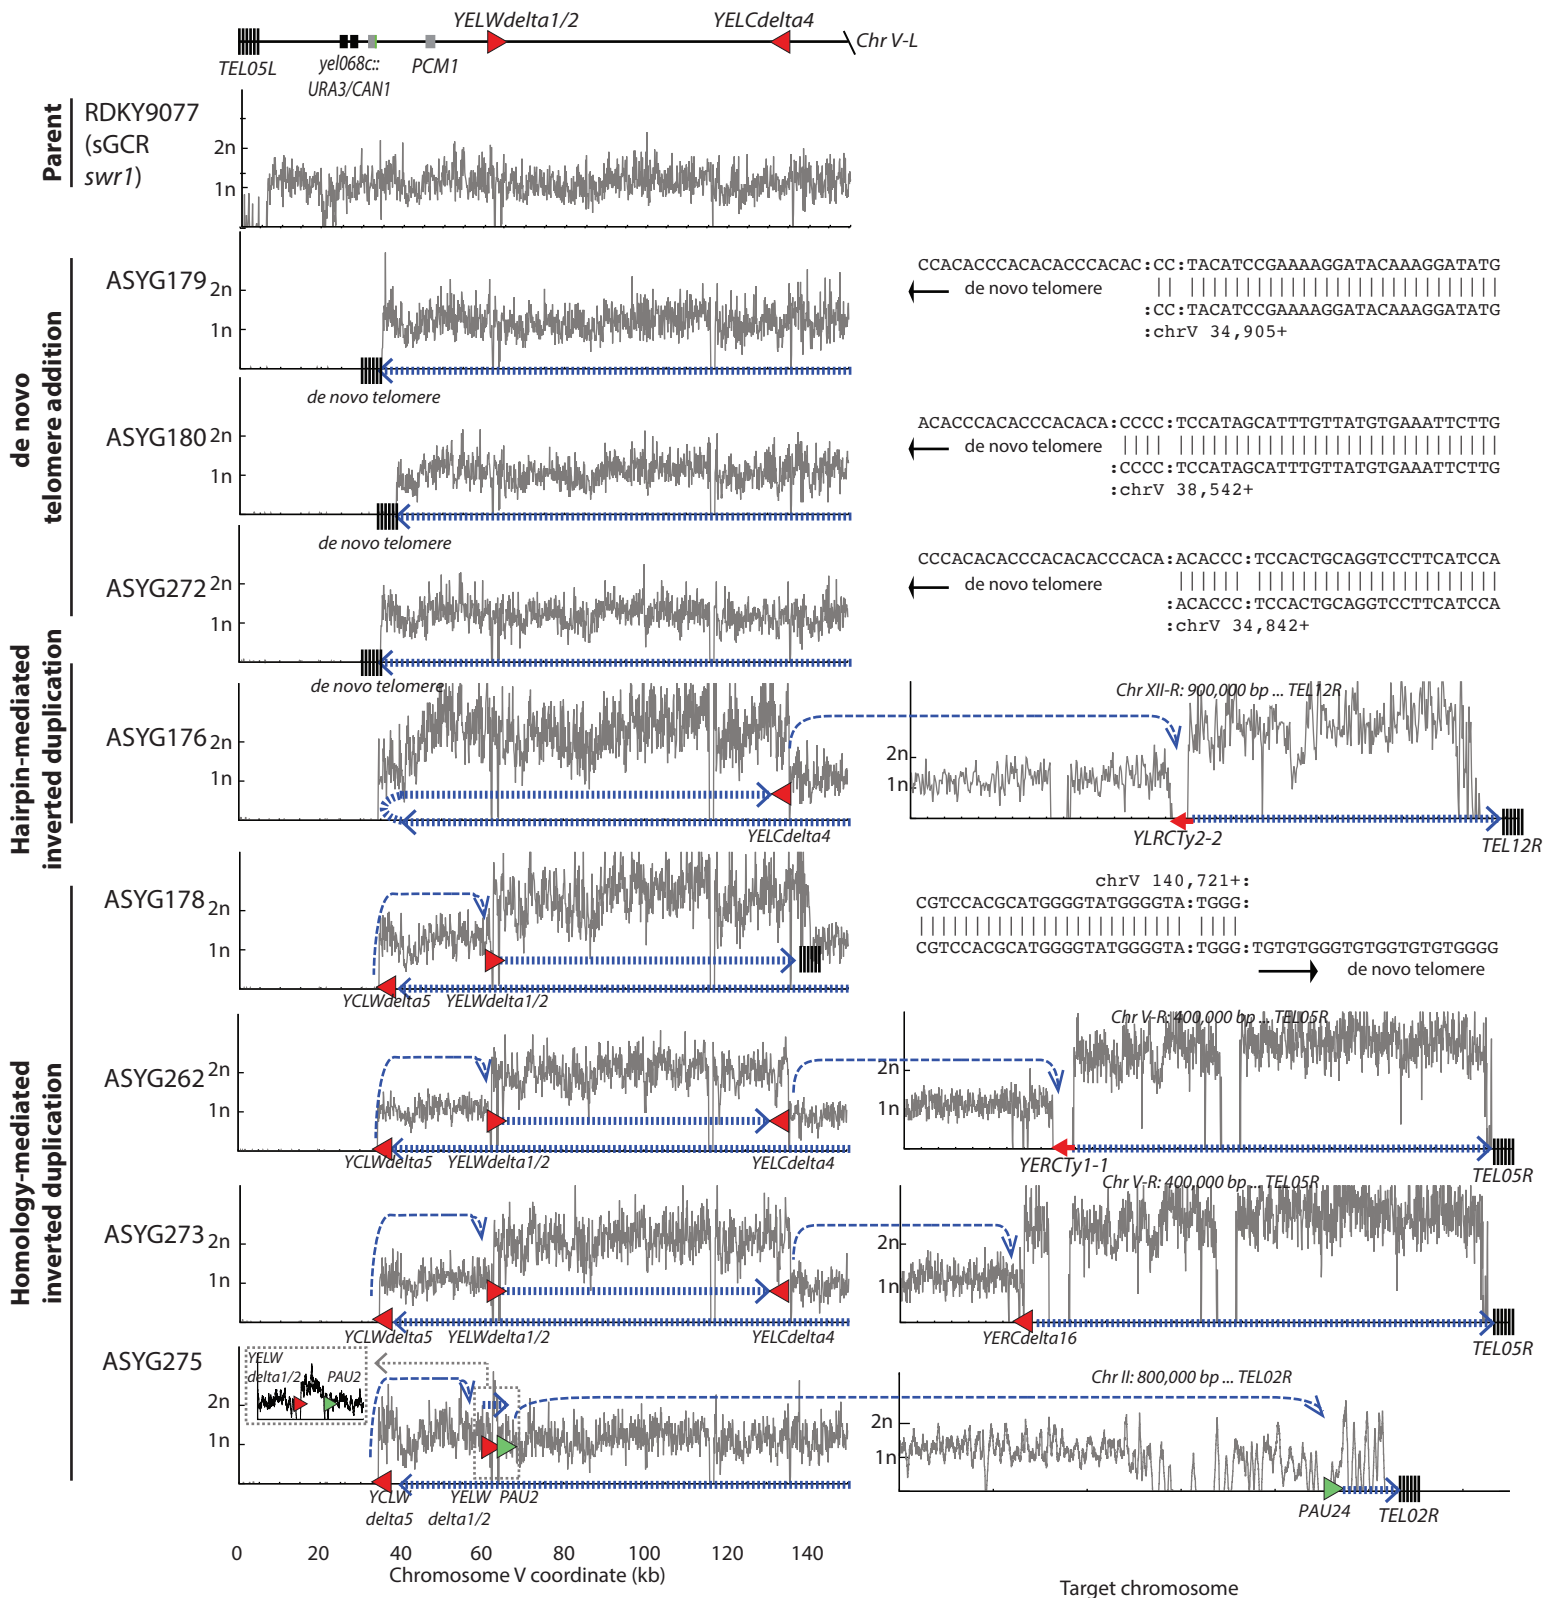

Supplementary Figure 7.

B

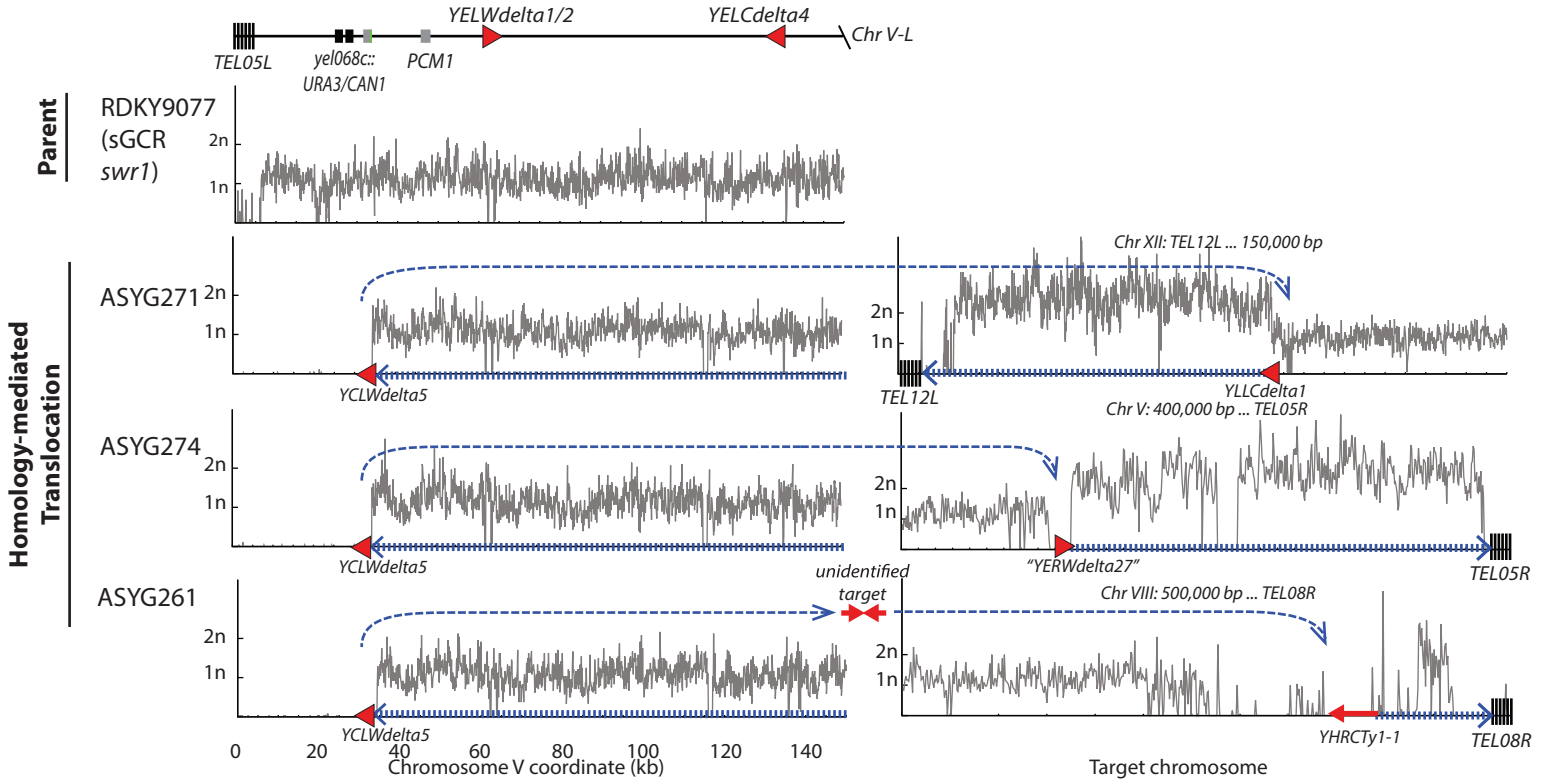

**Supplementary Figure 7. Analysis of *swr1Δ* GCRs isolated in the sGCR assay.** GCRs derived from a *swr1Δ* sGCR parent strain (RDKY9077) are depicted as described in Supplementary Fig. 3. Observed rearrangements include *de novo* telomere addition-mediated GCRs and interstitial deletions, hairpin-mediated inverted duplications, and homology-mediated inverted duplications (A); homology-mediated translocations (B).

Supplementary Figure 8.

A

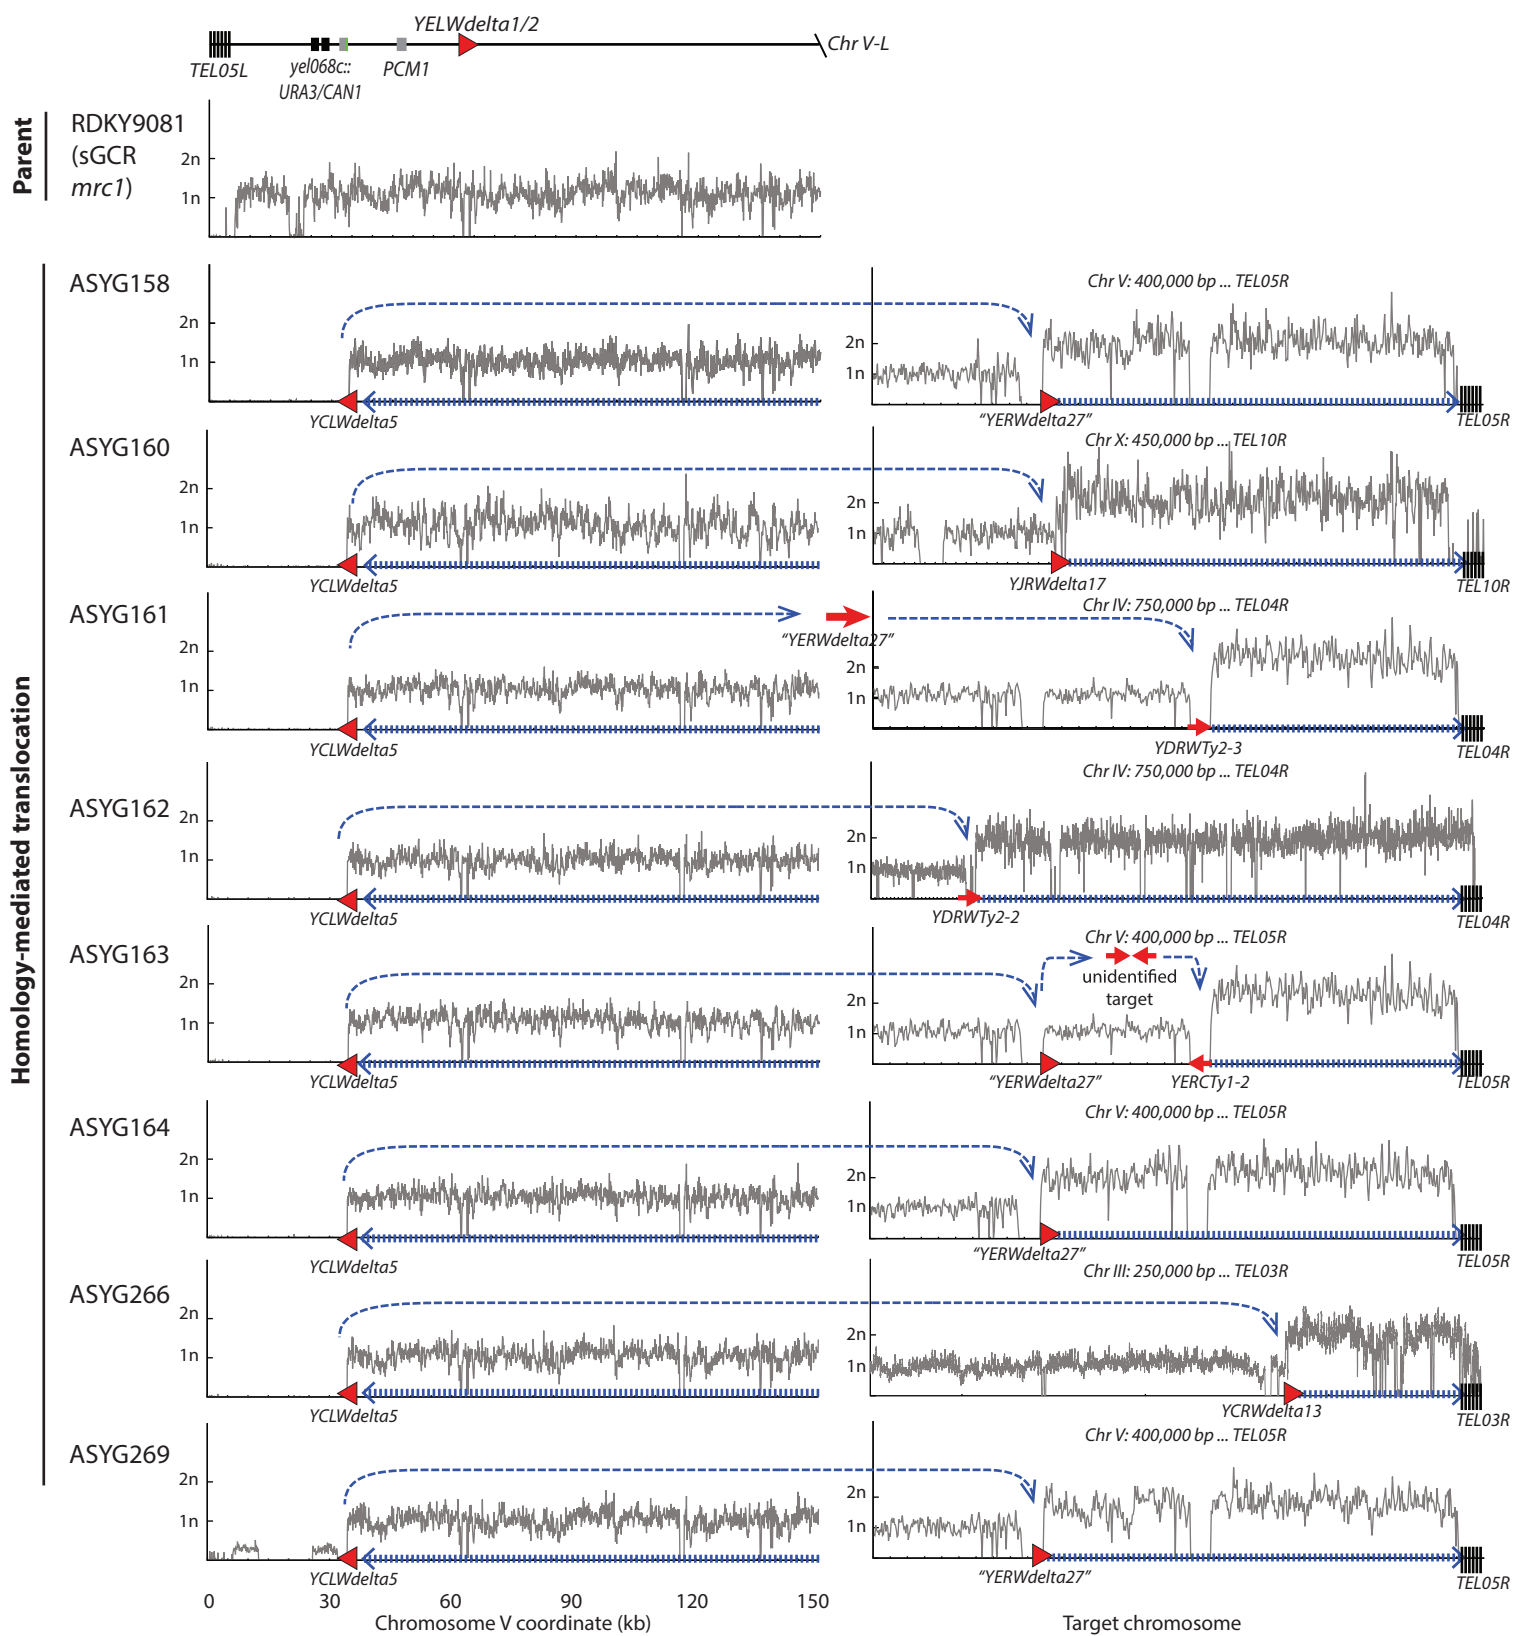

Supplementary Figure 8.

B

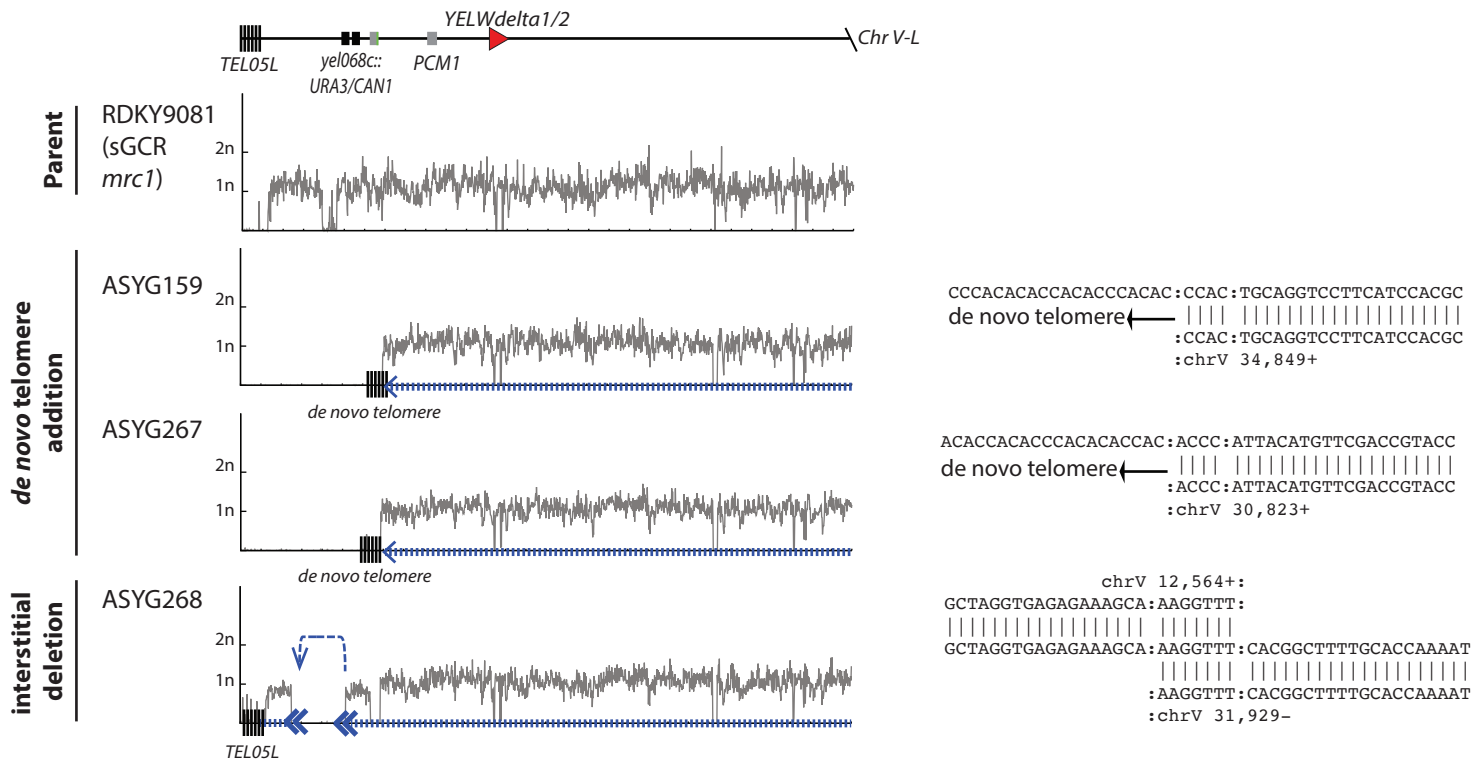

**Supplementary Figure 8. Analysis of *mrc1Δ* GCRs isolated in the sGCR assay.** GCRs derived from an *mrc1Δ* sGCR parent strain (RDKY9081) are depicted as described in Supplementary Fig. 3. Observed rearrangements include homology-mediated inverted duplications (A); and *de novo* telomere addition-mediated GCRs and interstitial deletions (B).



Supplementary Figure 9.

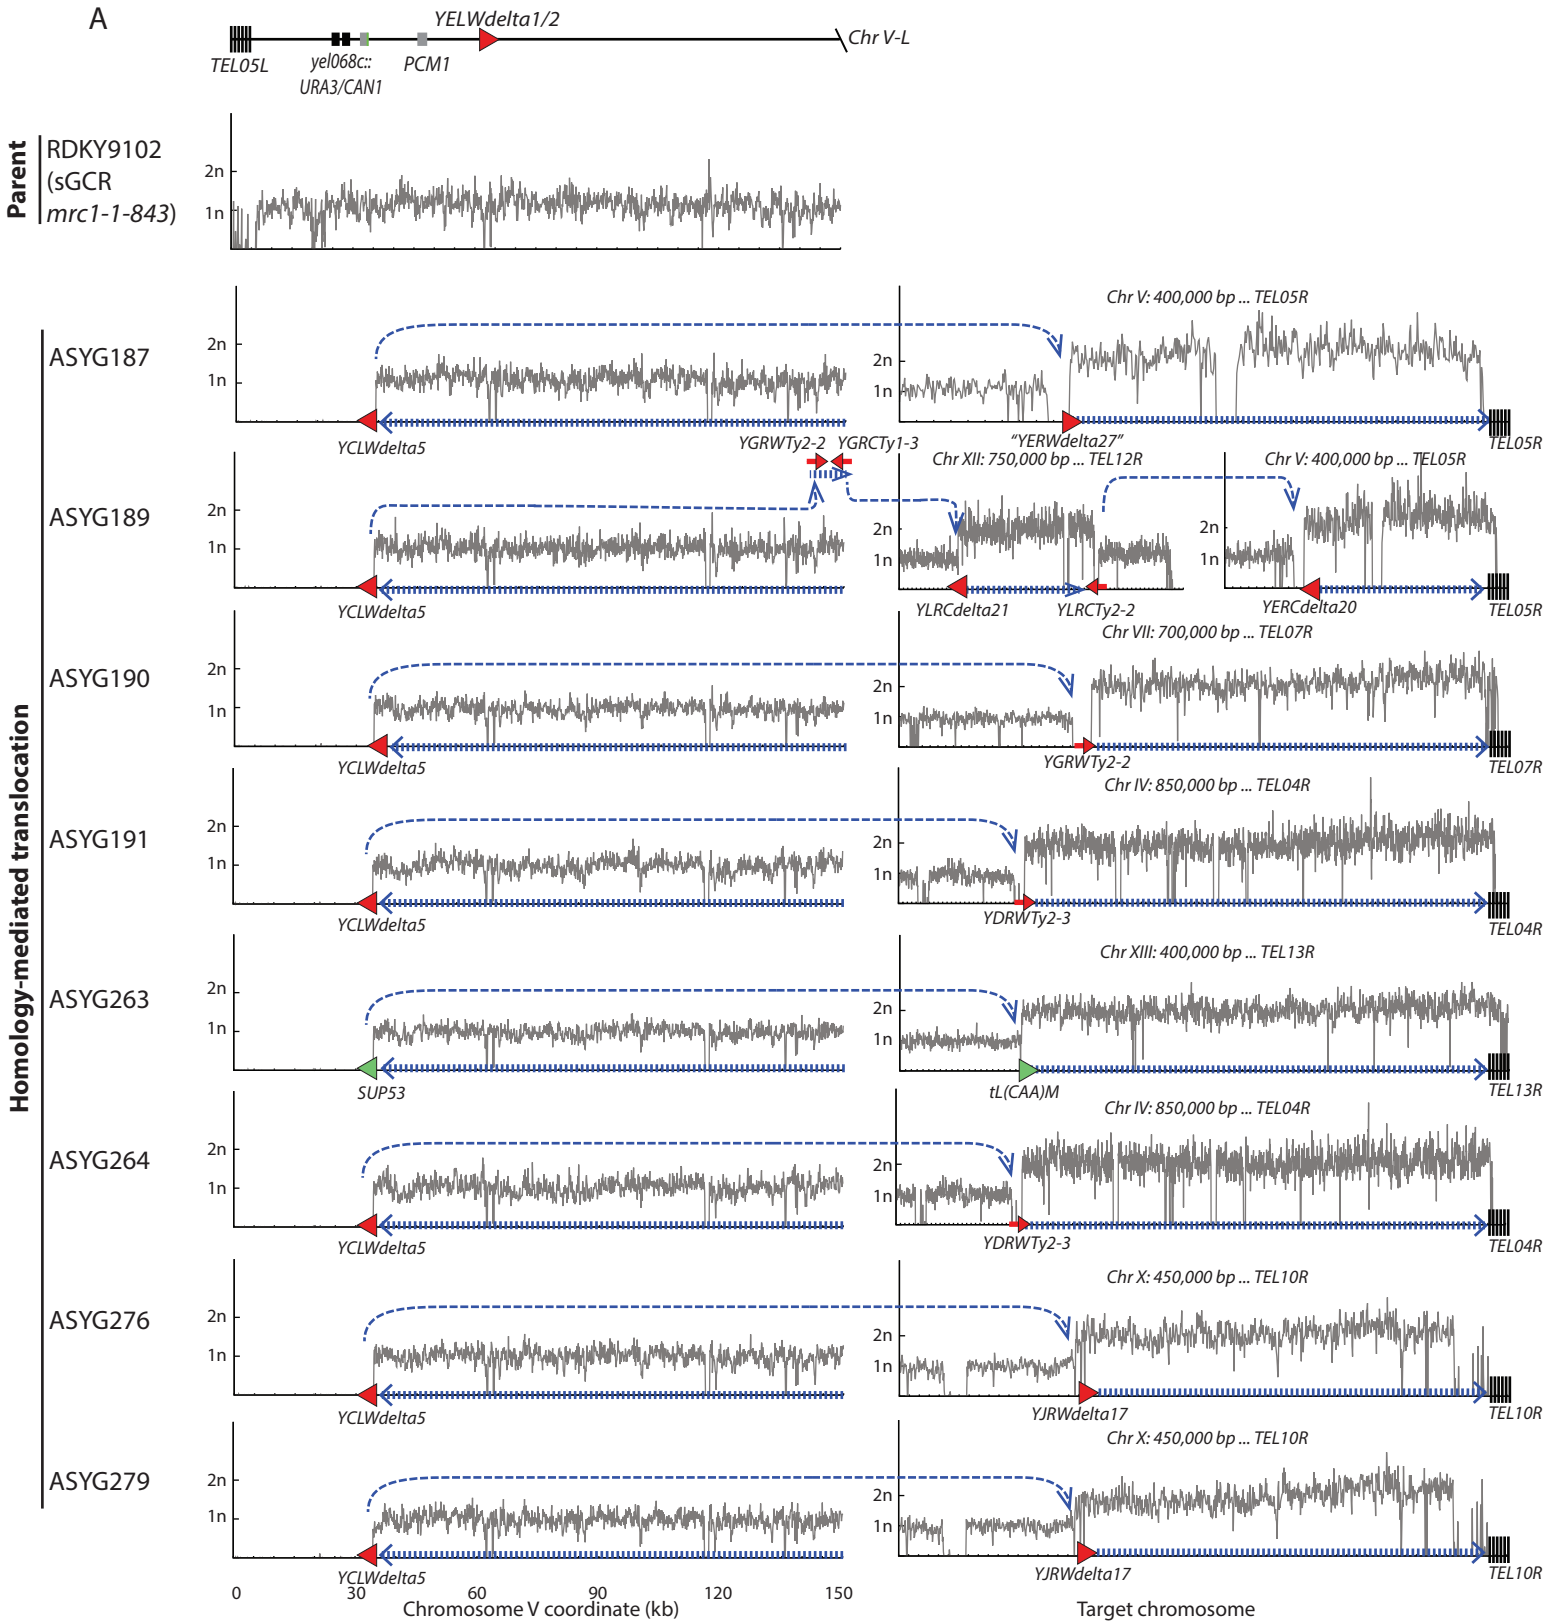

Supplementary Figure 9.

B

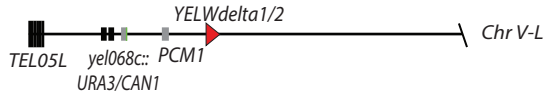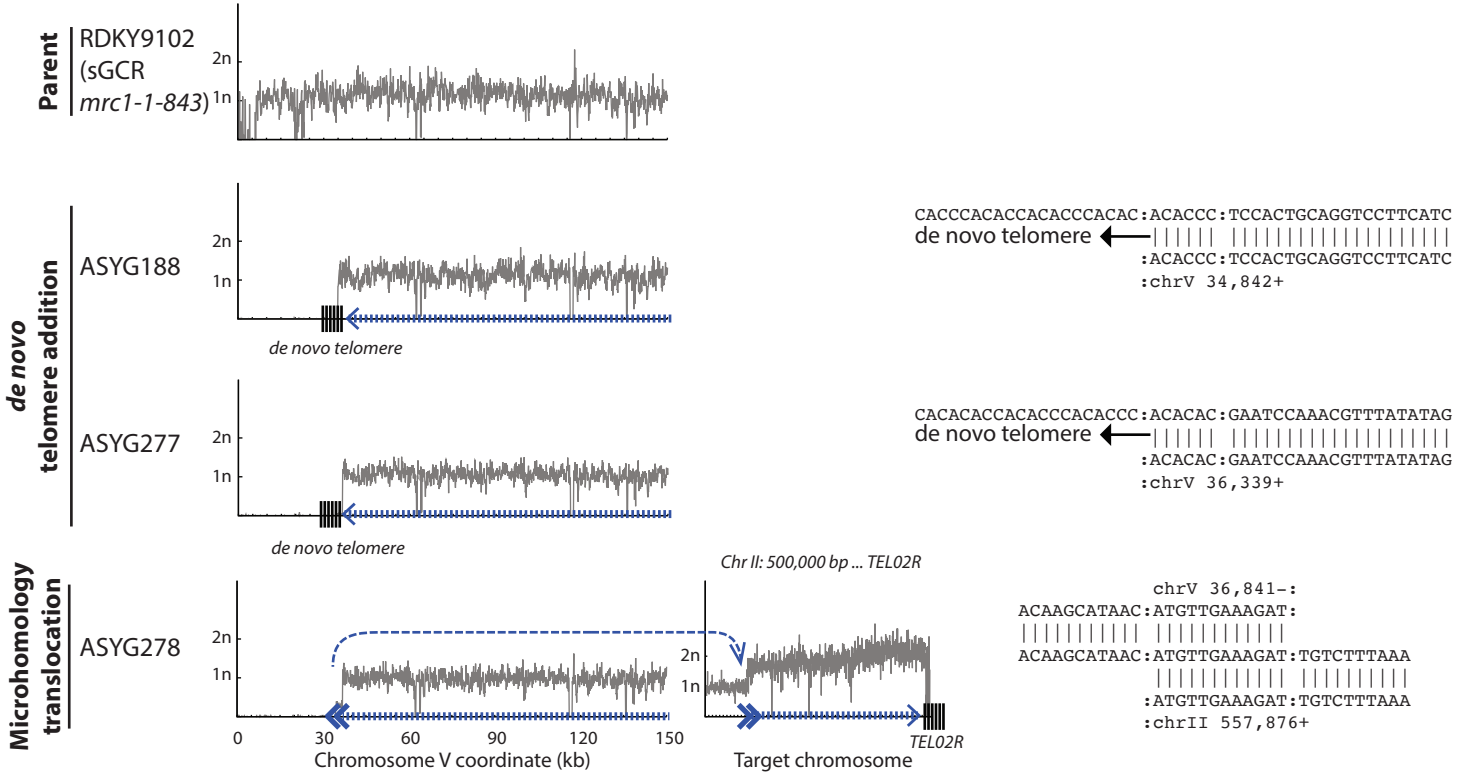

**Supplementary Figure 9. Analysis of *mrc1-1-843* GCRs isolated in the sGCR assay.** GCRs derived from an *mrc1-1-843* sGCR parent strain (RDKY9102) are depicted as described in Supplementary Fig. 3. Observed rearrangements include homology-mediated translocations (A); and *de novo* telomere addition-mediated GCRs and microhomology-mediated translocations (B).

Supplementary Figure 10.

A

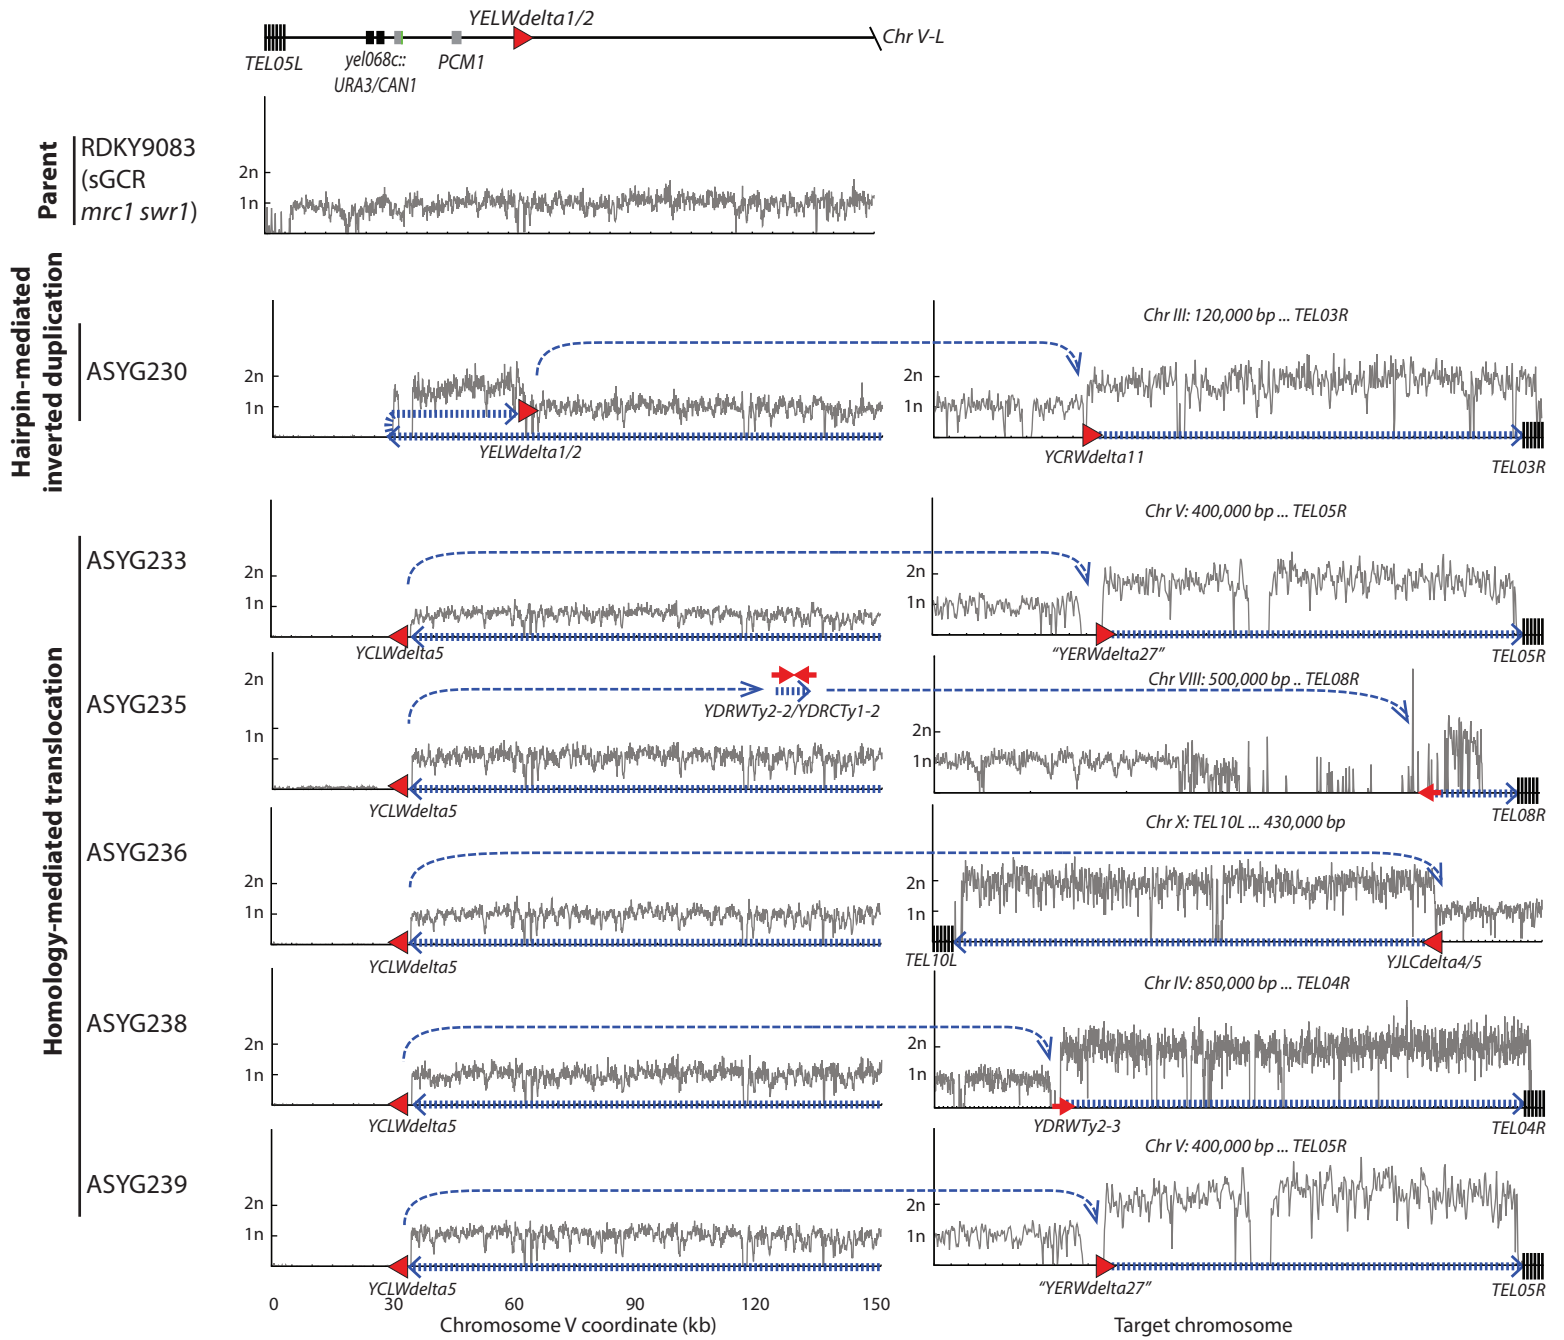



Supplementary Figure 11.

A

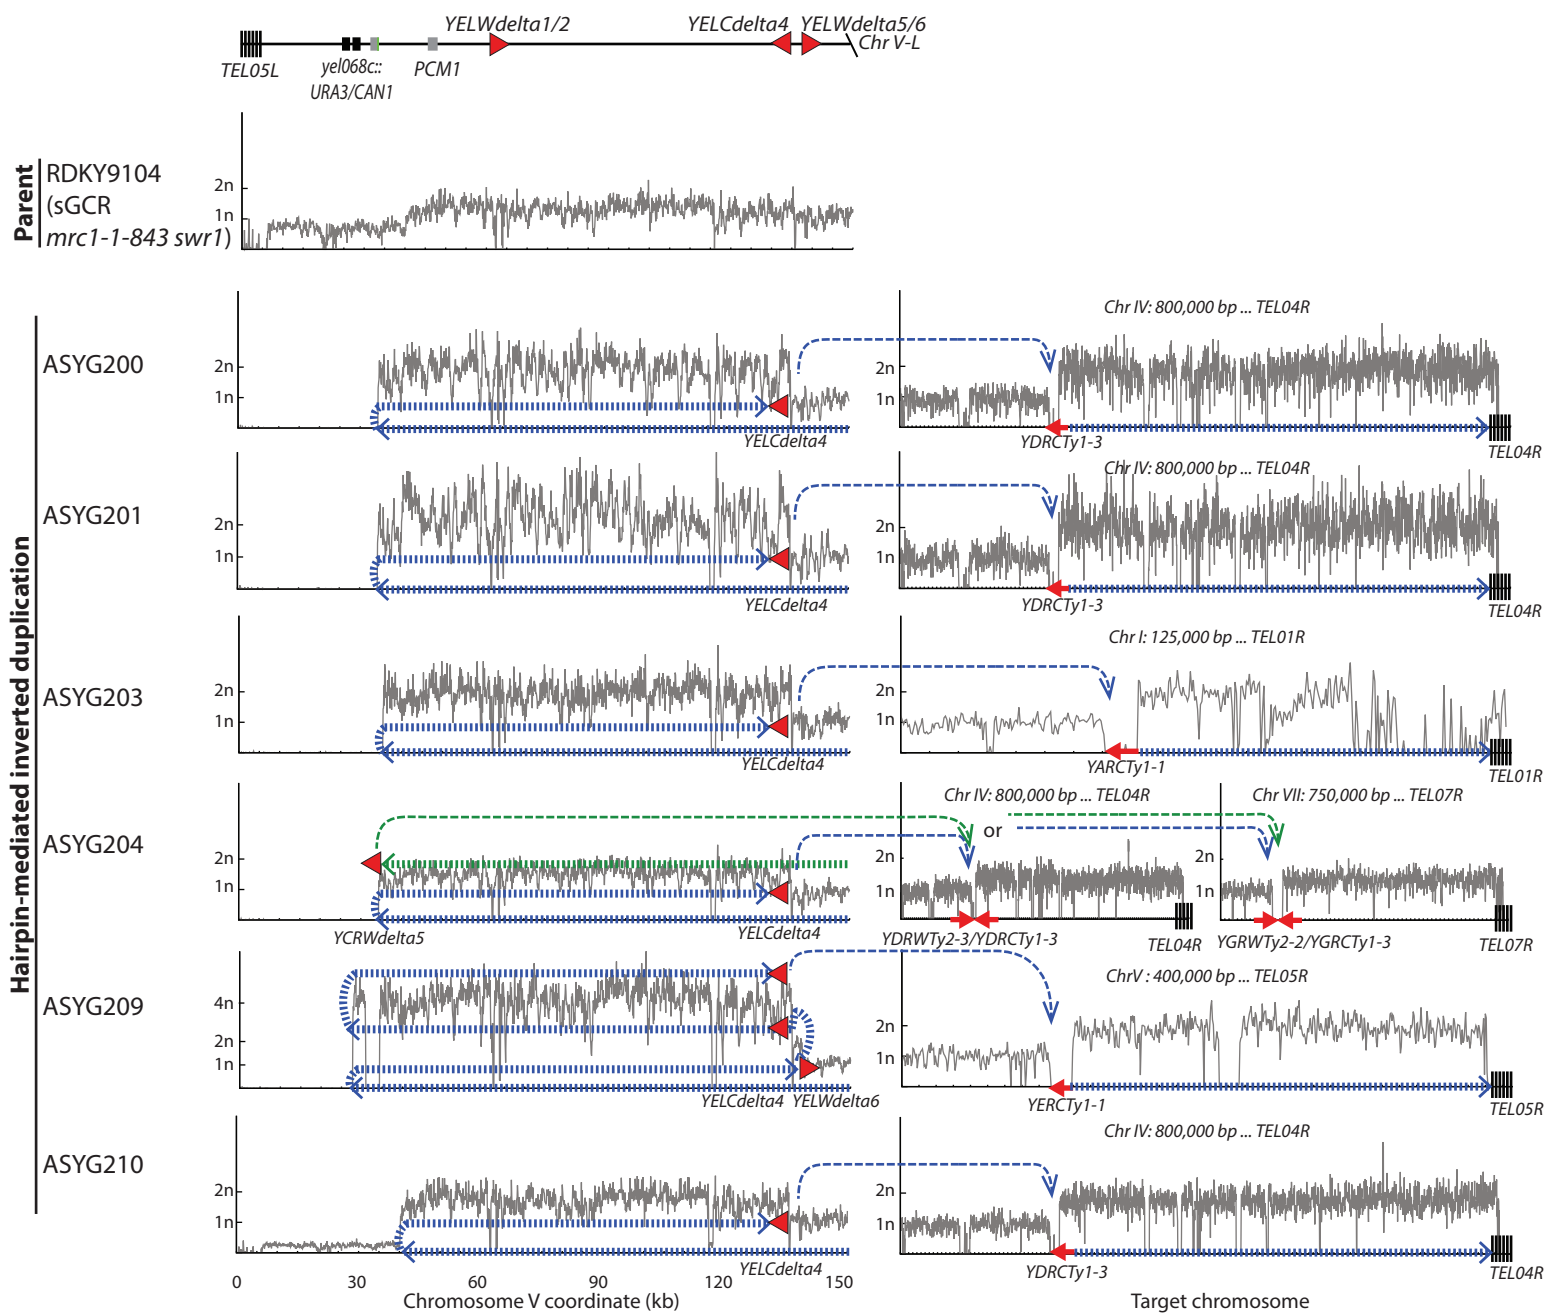

Supplementary Figure 11.

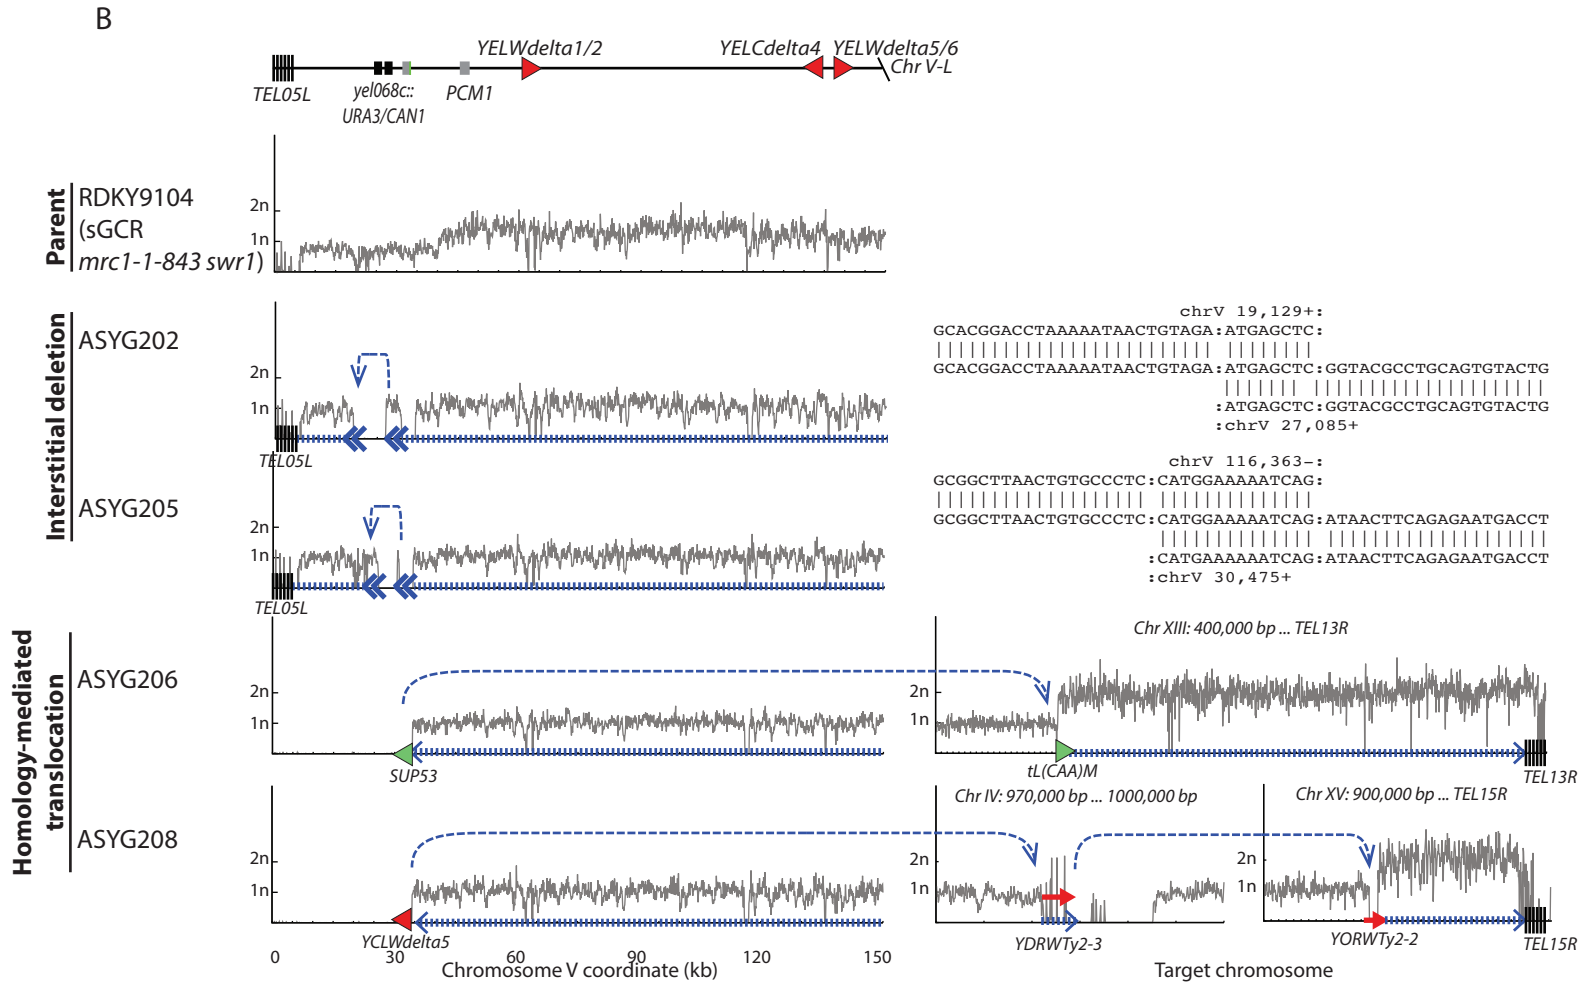

**Supplementary Figure 11. Analysis of *mrc1-1-843 swr1Δ* GCRs isolated in the sGCR assay.**

GCRs derived from an *mrc1-1-843 swr1Δ* sGCR parent strain (RDKY9104) are depicted as described in Supplementary Fig. 3. Observed rearrangements include hairpin-mediated inverted duplications (**A**); and interstitial deletions and homology-mediated translocations (**B**).

# Supplementary Figure 12A

## ASYG203 (sGCR *mrc1-C14 swr1*)

chrV 35,312-:

GAAGGAGCGTATATGTTAGAAAATTGGAAAATATCTGATAATG:TAACA:  
 |||||  
 GAAGGAGCGTATATGTTAGAAAATTGGAAAATATCTGATAATG:TAACA:TATACGCTCCTTCTTCATTAATTAGGAATTTTTGACTG  
 |||||  
 :TAACA:TATACGCTCCTTCTTCATTAATTAGGAATTTTTGACTG  
 :chrV 35,342+

### Potential mechanism of inversion formation

DSB

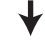

5' -TGTACATTATCAGATATTTTCCAATTTTCTAACATATACGCTCCTTCTTCATTAATTAGGAATTTTTT...-3'  
 |||||  
 3' -ACAATGTAATAGTCTATAAAAAGGTTAAAAGATTGTATATGCGAGGAAGAAGTAATTAATCCTTAAAAAA...-5'

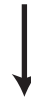

5' resection to generate 3' overhang

CATTAATTAGGAATTTTTT...-3'  
 |||||

3' -ACAATGTAATAGTCTATAAAAAGGTTAAAAGATTGTATATGCGAGGAAGAAGTAATTAATCCTTAAAAAA...-5'

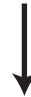

intramolecular loop formation

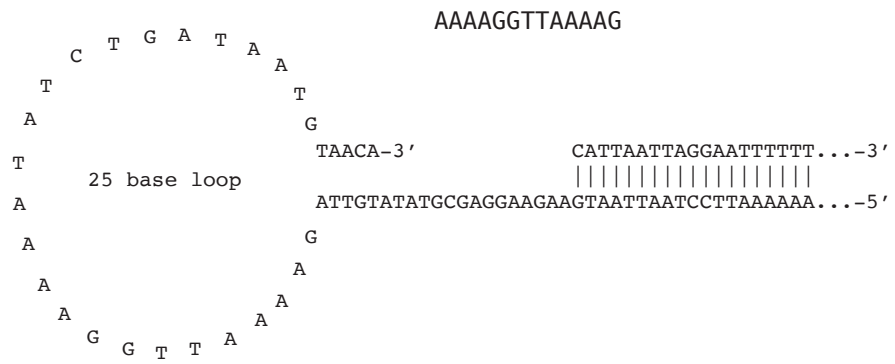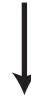

Hairpin-primed DNA synthesis

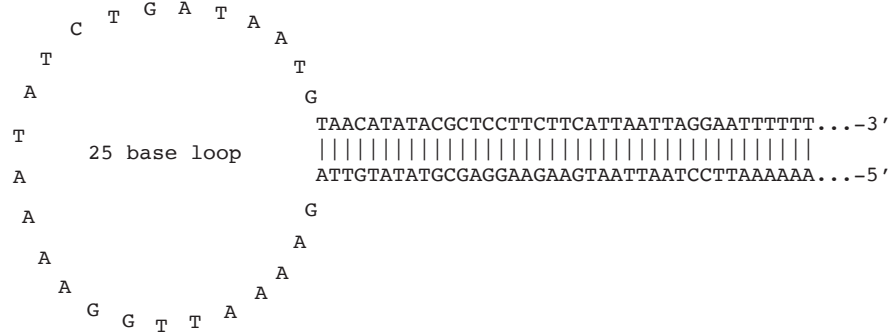

Supplementary Figure 12B

ASYG176  
(sGCR *swr1*)

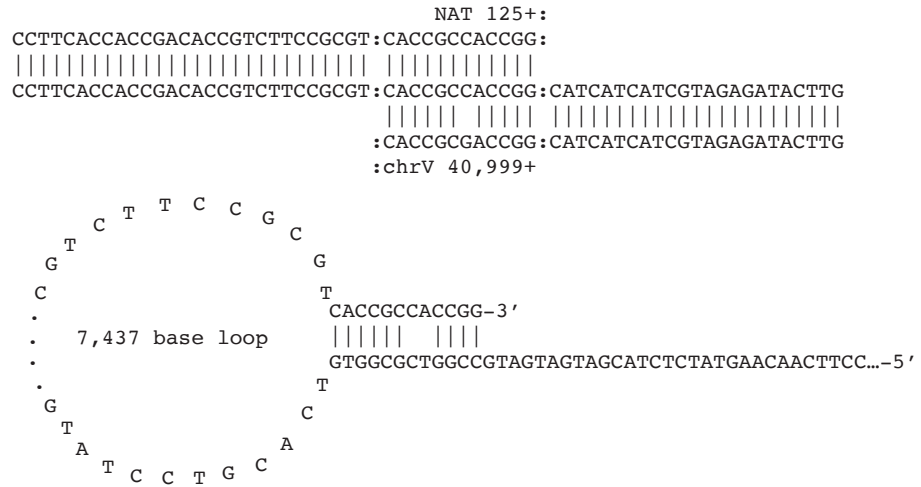

ASYG200  
(sGCR *mrc1-C14 swr1*)

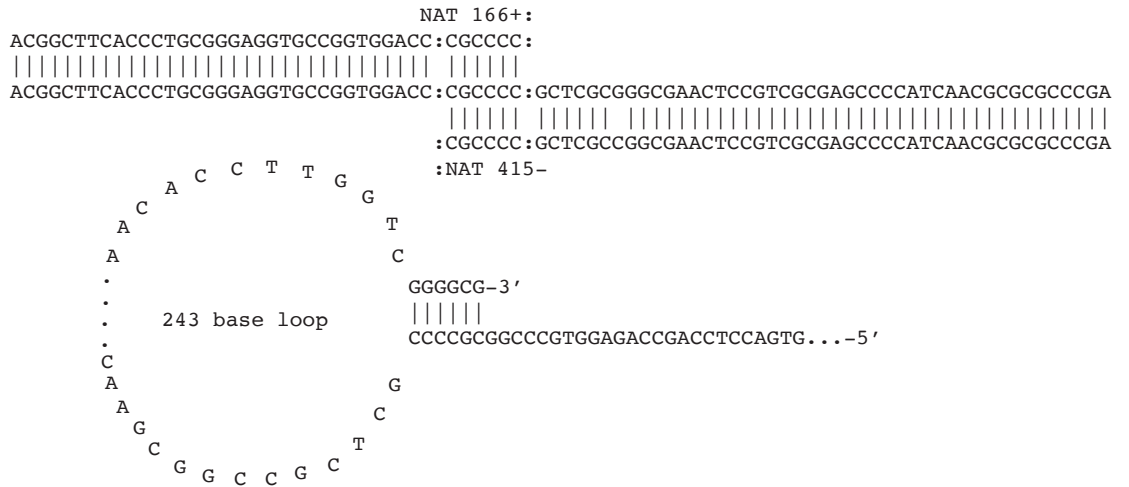

ASYG201  
(sGCR *mrc1-C14 swr1*)

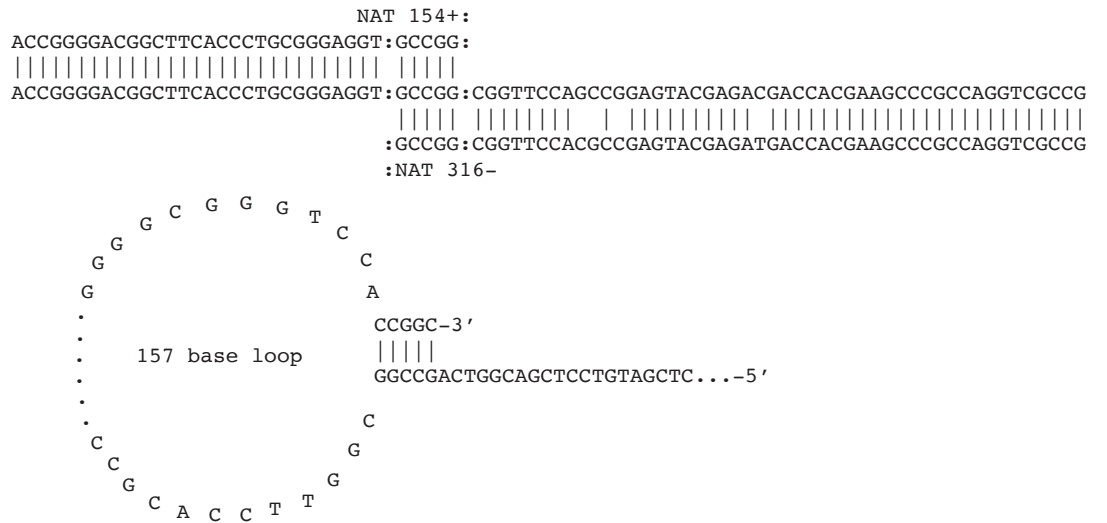



Supplementary Figure 12C

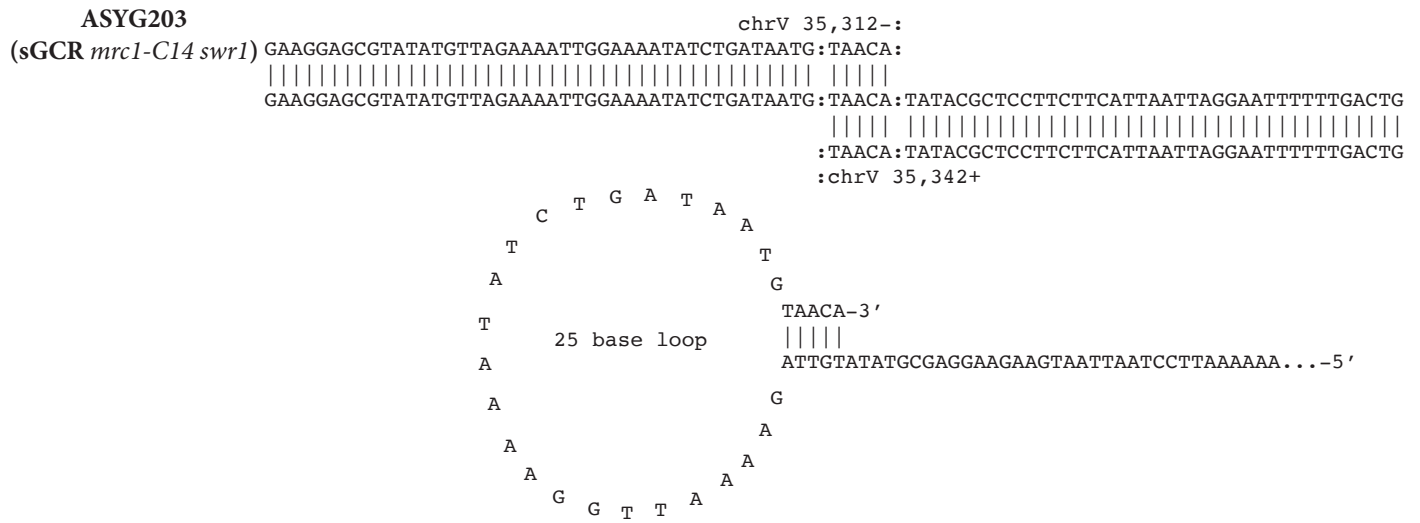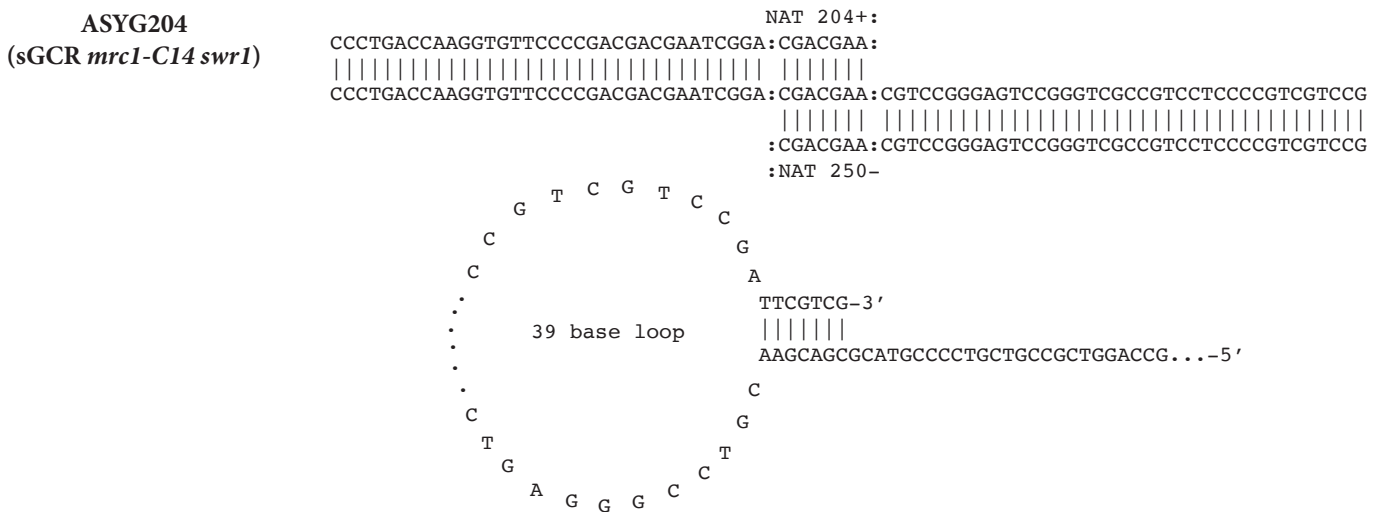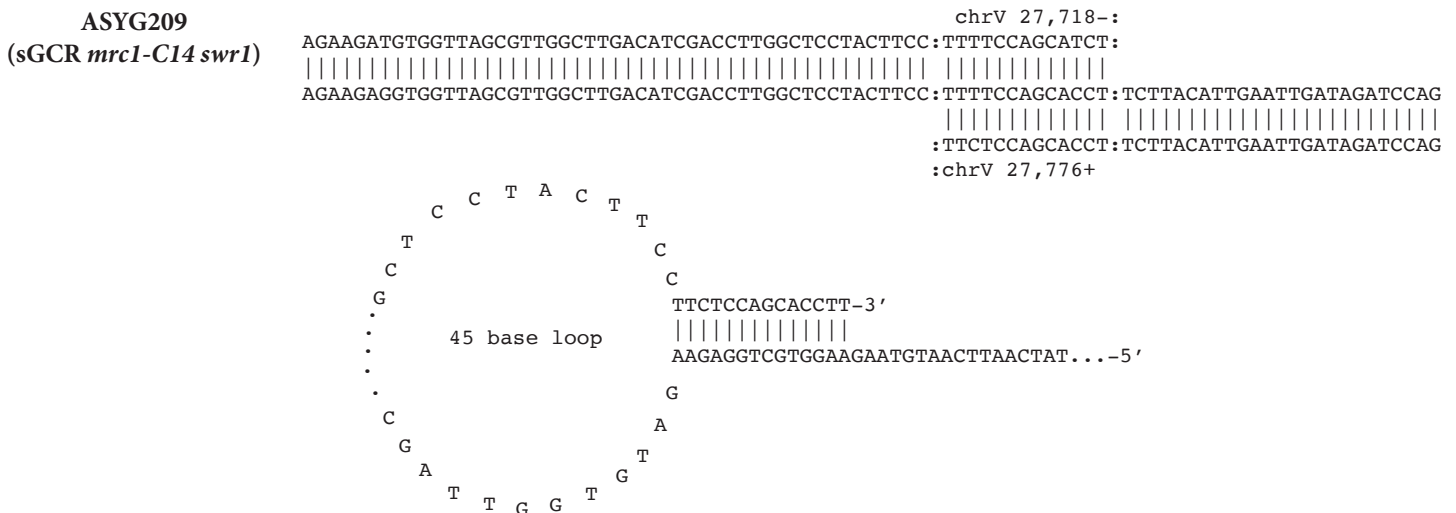

# Supplementary Figure 12D

## ASYG210 (sGCR *mrc1-C14 swr1*)

chrV 40,117-:  
GTCCCATTCATCTGGTTTCAAGCAAGAA:TTGAACATGGATGAAT:  
|||||  
GTCCCATTCATCTGGTTTCAAGCAAGAA:TTGAACATGGATGAAT:GGGACTTTTGGTATCATTCCA  
|||||  
:TTGAAACCAGATGAAT:GGGACTTTTGGTATCATTCCA  
:chrV 40,140+

7 base loop  
G A A TTGAACATGGATGAAT-3'  
A |||||  
A C G AACTTTGGTCTACTTACCCTGAAAAACCATA...-5'

## ASYG230 (sGCR *mrc1 swr1*)

:chrV 29,524+  
:GTAAAGATAGGAAAGA:TAAATATTATCTCACCCAAATAATTTTCATACATGCACAT  
|||||  
ATAATATTAATCTTTCCTATCTTTACTGCTT:GTAAAGTGCGTAAAGA:TAAATATTATCTCACCCAAATAATTTTCATACATGCACAT  
|||||  
ATAATATTAATCTTTCCTATCTTTACTGCTT:GTAAAGTGCGTAAAGA:  
ChrV 29,503-:

5 base loop  
T T AAAGTGCGTAAAGA-3'  
C |||||  
G C ATTTCTATCCTTCTAATTATAATAGAGTGGGTTTATTAAGTATGTA...-5'

## ASYG281 (uGCR wt)

NAT 344+:  
TGGAACCGCCGGCTGACCGTCGAGGACATCGAGGTC:GCCCC:  
|||||  
TGGAACCGCCGGCTGACCGTCGAGGACATCGAGGTC:GCCCC:ATCAACGCGCGCCCGACCCCGTGCCCCCGGTGCTCCGG  
|||||  
:GCCCC:ATCAACGCGCGCCCGACCCCGTGCCCCCGGTGCTCCGG  
:NAT 385-

36 base loop  
C G G T G C T  
C C C C C  
C C C C C  
C C C C C  
G G G G C -3'  
C C C C G A C G C T G C C T C A A G C G C C G C ...-5'

## ASYG287 (uGCR wt)

NAT 344+:  
TGGAACCGCCGGCTGACCGTCGAGGACATCGAGGTCG:CCCC:  
|||||  
TGGAACCGCCGGCTGACCGTCGAGGACATCGAGGTCG:CCCC:ATCCGCCGGTACGCGTGGATCGCCGGTGCCTTGA  
|||||  
:CCCC:ATCCGCCGGTACGCGTGGATCGCCGGTGCCTTGA  
:NAT 483-

135 base loop  
C G G T G C T  
C C C C C  
C C C C C  
C C C C C  
G G G G -3'  
C C C C A A G T G G G A G A C G C C G G A C C T G T G ...-5'



# Supplementary Figure 12F

## ASYG300 (uGCR *mrc1*)

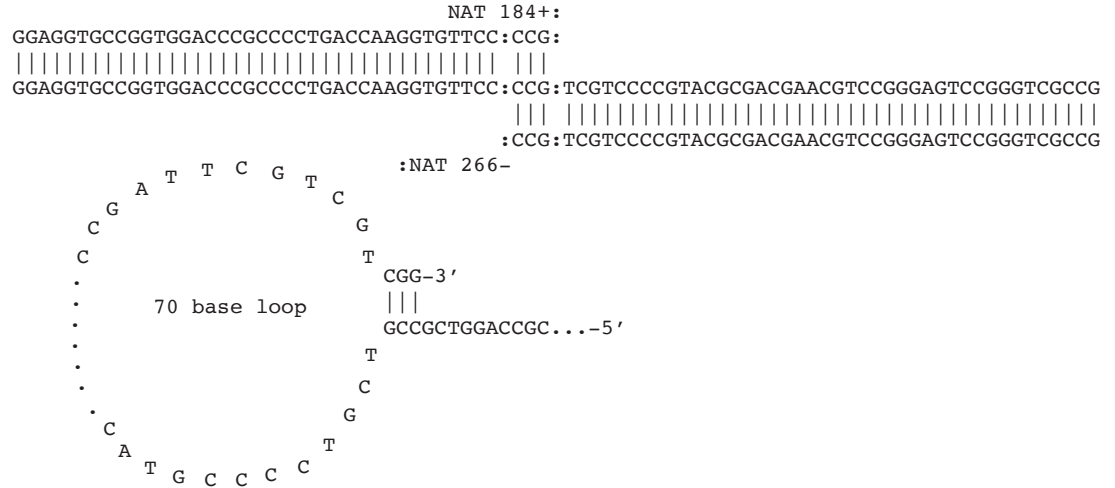

## ASYG301 (uGCR *mrc1*)

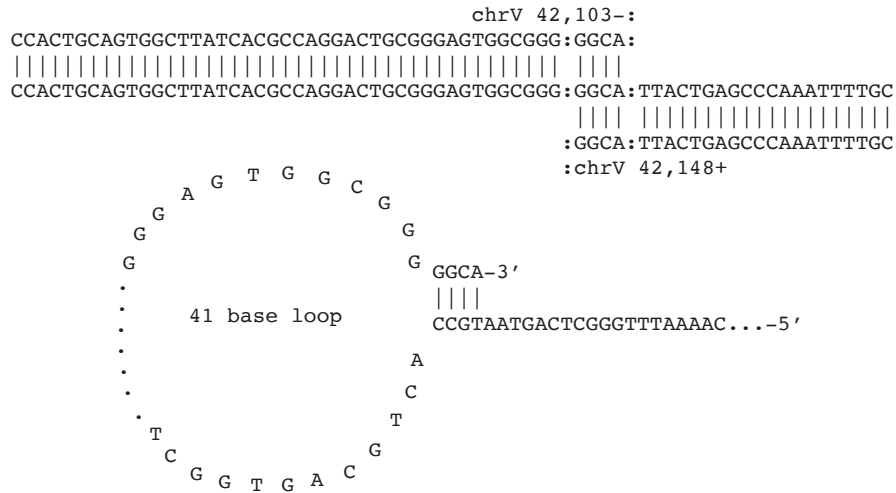

## ASYG302 (uGCR *mrc1*)

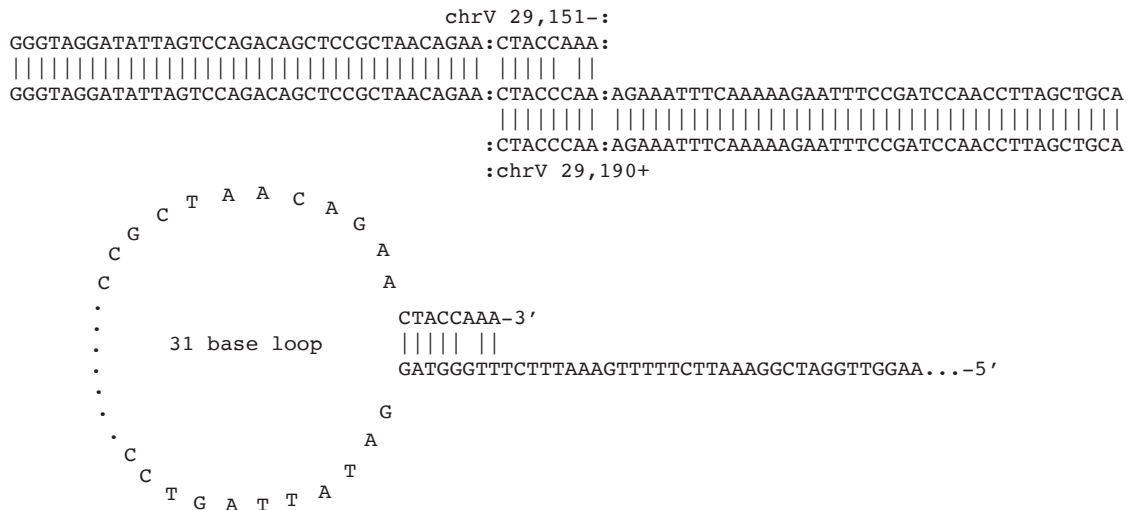

Supplementary Figure 12G

ASYG307  
(uGCR *mrc1*)

chrV 42,756-:  
 CACTTCCGCAGCGCAGTACGTAA: TGC GGTATCGTG:  
 |||||  
 CACTTCCGCAGCGCAGTACGTAA: TGC GGTATCGTG: GATGAGTGGCATATACACTCTTCTGCAGAGGATTTTCGTACACAACGG  
 |||||  
 :TGC GGAAGTGTG: GATGAGTGGCATATACACTCTTCTGCAGAGGATTTTCGTACACAACGG  
 :chrV 42,781+

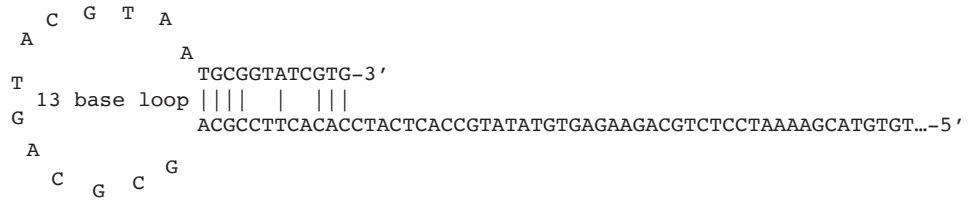

ASYG308  
(uGCR *swr1*)

NAT 344+:  
 TCGTACTCGGCGTGGAACCGCCGGCTGACCGTCGAGGACATCGAGGTC: GCCCC:  
 |||||  
 TCGTACTCCGGCTGGAACCGCCGGCTGACCGTCGAGGACATCGAGGTC: GCCCC: ATCAACGCGCGCCCGACCCCGTGCCCCGGTGCT  
 |||||  
 :GCCCC: ATCAACGCGCGCCCGACCCCGTGCCCCGGTGCT  
 :NAT 385-

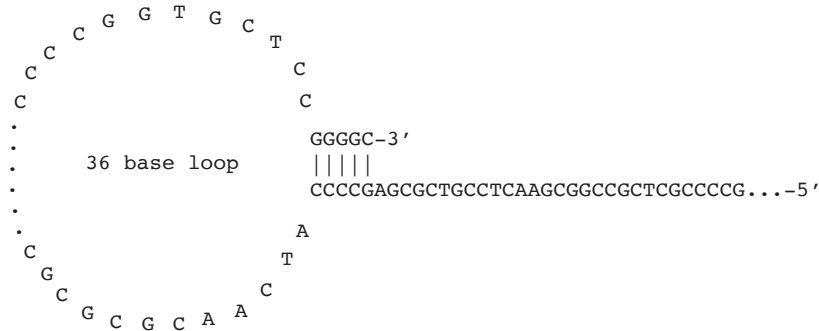

ASYG310  
(uGCR *swr1*)

chrV 35,846-:  
 ACCTGCATTTATCATTACAGGAAAAGAGTAGCA: CCTGTAAATGATA:  
 |||||  
 ACCTGCATTTATCATTACAGGAAAAGAGTAGCA: CCTGTAAATGATA: AATGCAGGTTACAGTGA  
 |||||  
 :CCTGTAA-TGATA: AATGCAGGTTACAGTGA  
 :chrV 35,871+

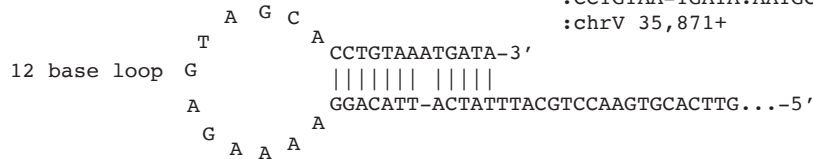

ASYG316  
(uGCR *swr1*)

chrV 40,117-:  
 GTCCCATTCATCTGGTTTCAAGCAAGAATTGAACATG: GATGAAT:  
 |||||  
 GTCCCATTCATCTGGTTTCAAGCAAGAATTGAACATG: GATGAAT: GGGACTTTTGGTATCATT  
 |||||  
 :GATGAAT: GGGACTTTTGGTATCATT  
 :chrV 40,149+

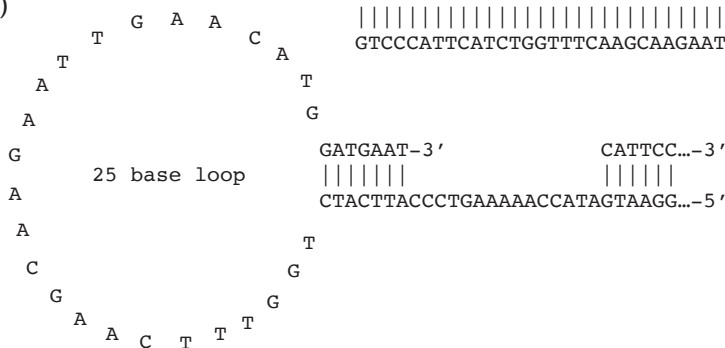

# Supplementary Figure 12H

**ASYG317**  
(uGCR *swr1*)

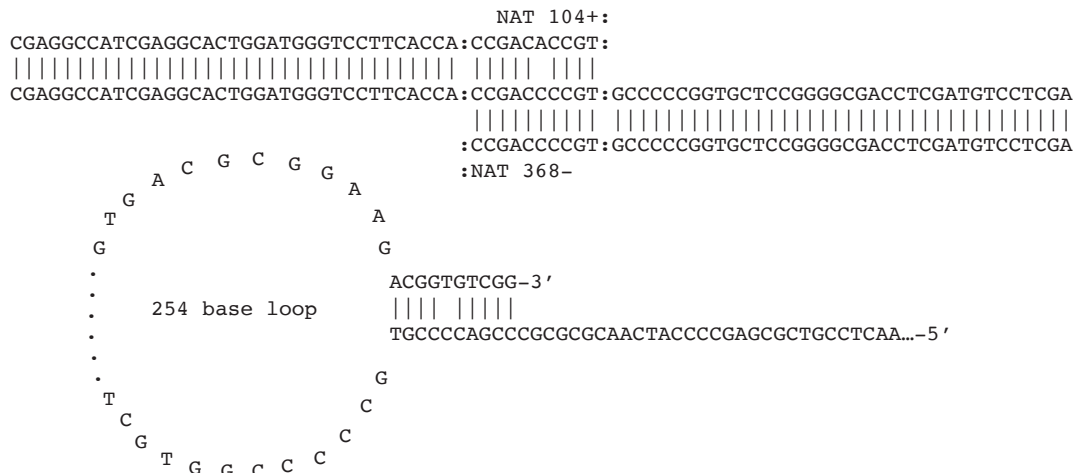

**ASYG325**  
(uGCR *mrc1 swr1*)

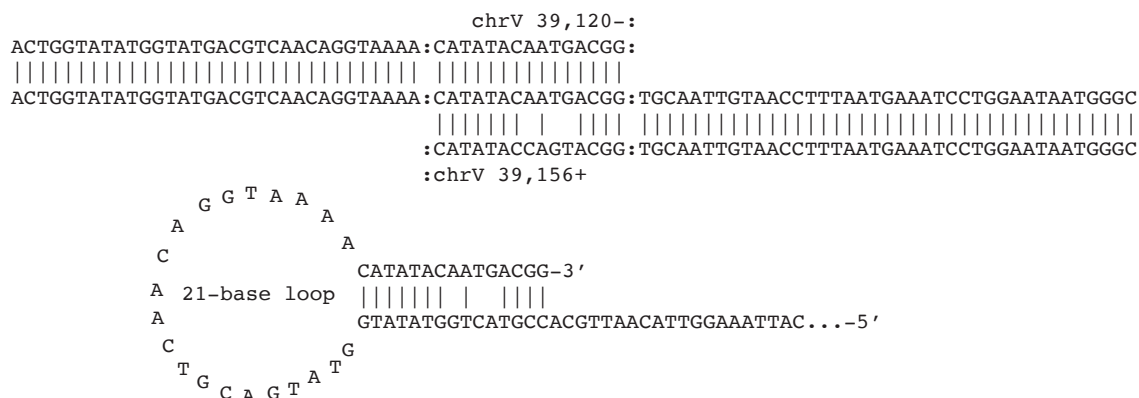

**ASYG328**  
(uGCR *mrc1 swr1*)

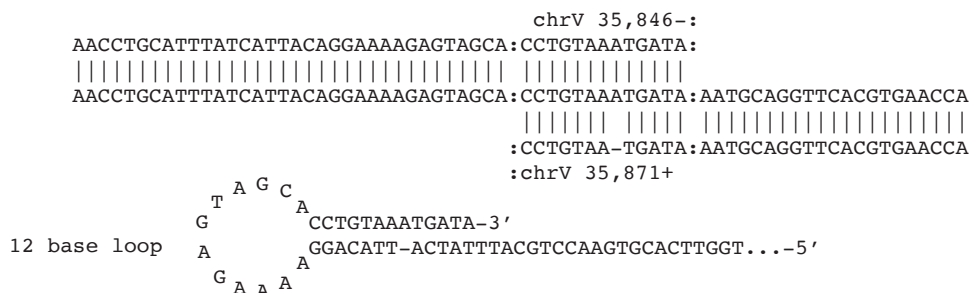

**ASYG477**  
(uGCR *mrc1*)

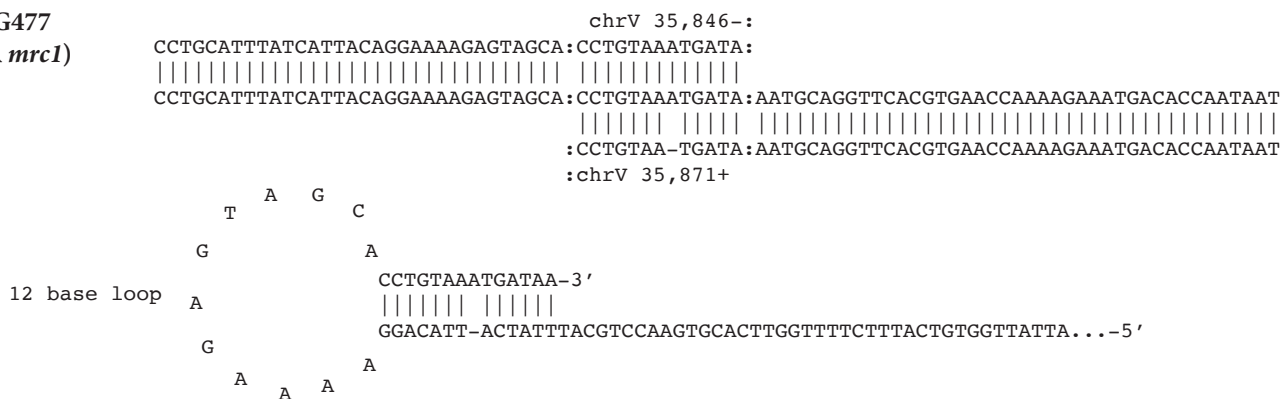



Supplementary Figure 12J

ASYG483  
(uGCR *mrc1*)

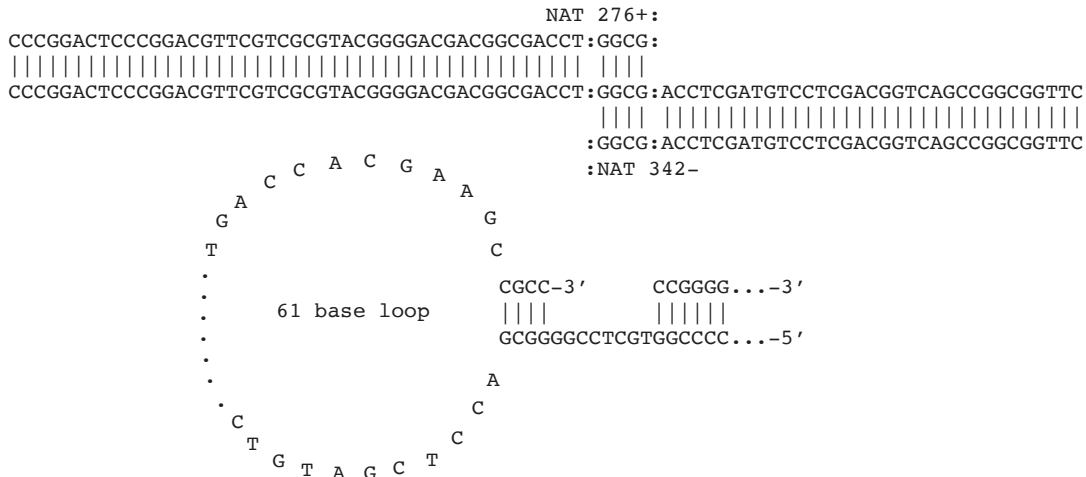

ASYG485  
(uGCR *swr1*)

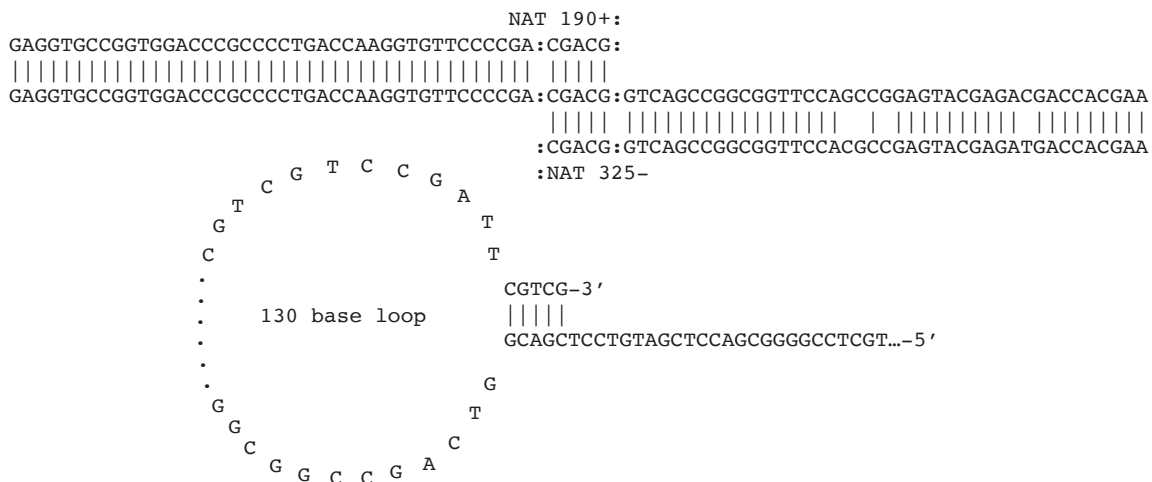

ASYG490  
(uGCR *swr1*)

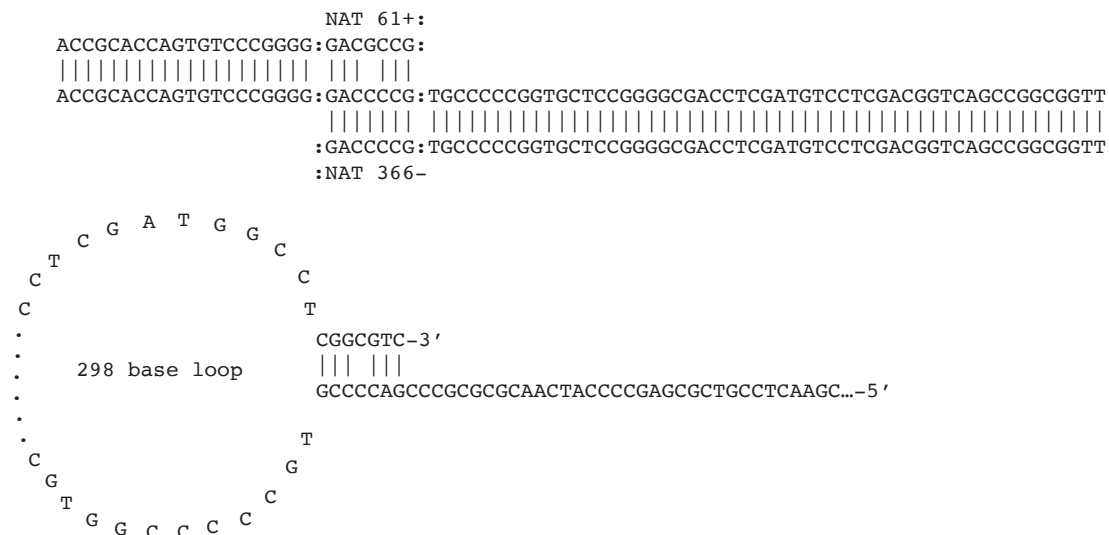



**Supplementary Figure 12. Structures of hairpin intermediates in hairpin-mediated inverted duplications.** **A.** Potential mechanism for the formation of a hairpin-mediated inverted duplication. **B.-J.** Top for each isolate: junction sequences recovered from NGS of the hairpin-mediated inverted duplication GCRs (middle line) and alignments to the two portions of the reference genome (top and bottom lines). The sequence between the colons corresponds to the microhomology at the junction, which likely corresponds to the annealed position of the hairpin intermediate. Bottom for each isolate: structures of the key hairpin intermediates. Loop sizes are not drawn to scale.

Supplementary Figure 13.

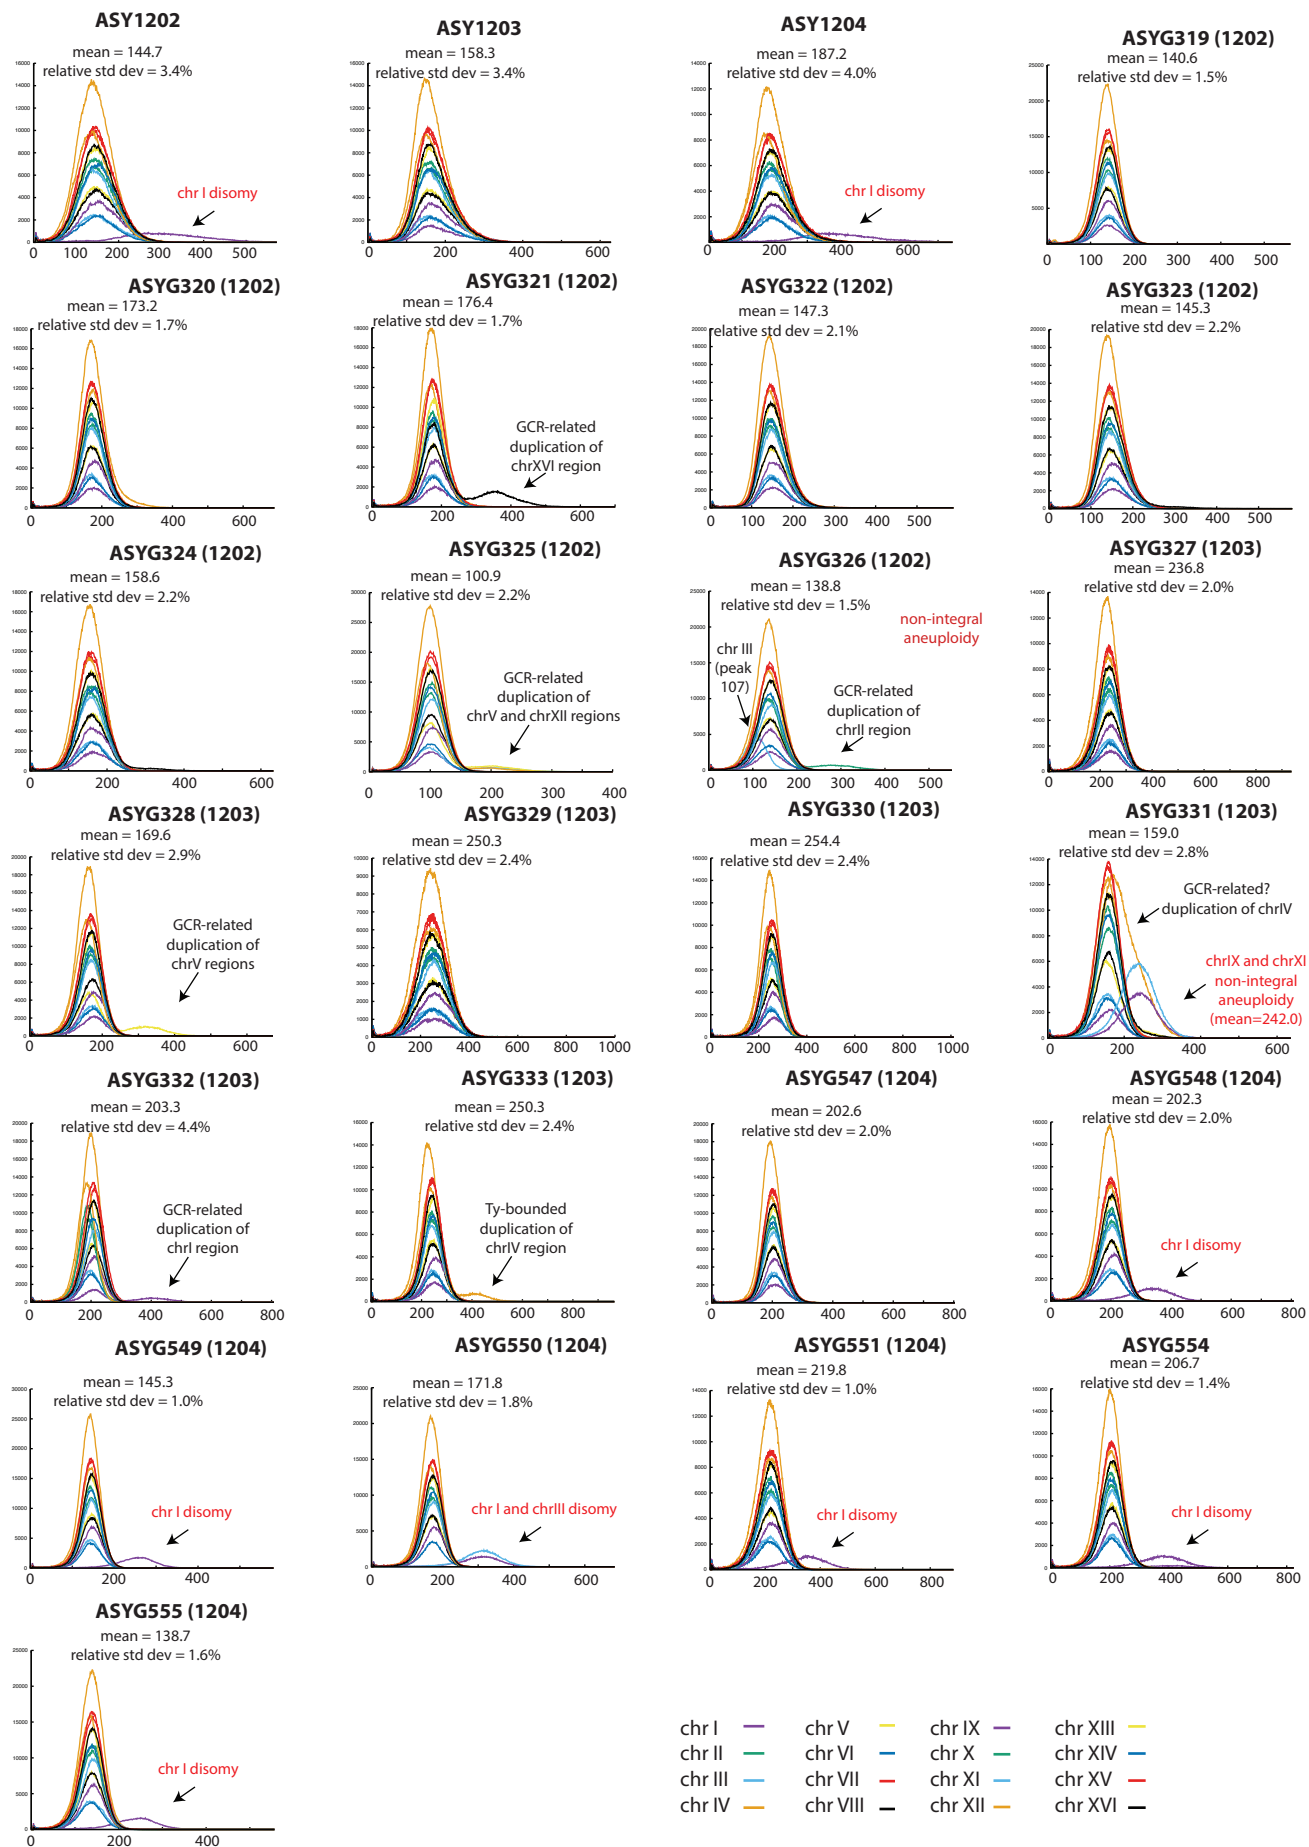

**Supplementary Figure 13. Analysis of the aneuploidy in *mrc1Δ swr1Δ* parental strains and GCR-containing isolates.** Copy number histogram plots for all chromosomes of the sequenced *mrc1Δ swr1Δ* uGCR parental strains (ASY1202-ASY1204) and the GCR-containing isolates derived from these strains. The parental strain for each isolate is indicated in parentheses. The x-value at the peak position for each plot corresponds to the average number of times base pairs in unique sequences were present in sequence reads. Secondary peaks specified by the arrow and accompanying description indicate copy number alterations in specific chromosomes, which are either GCR-related or due to aneuploidy.

Supplementary Figure 14

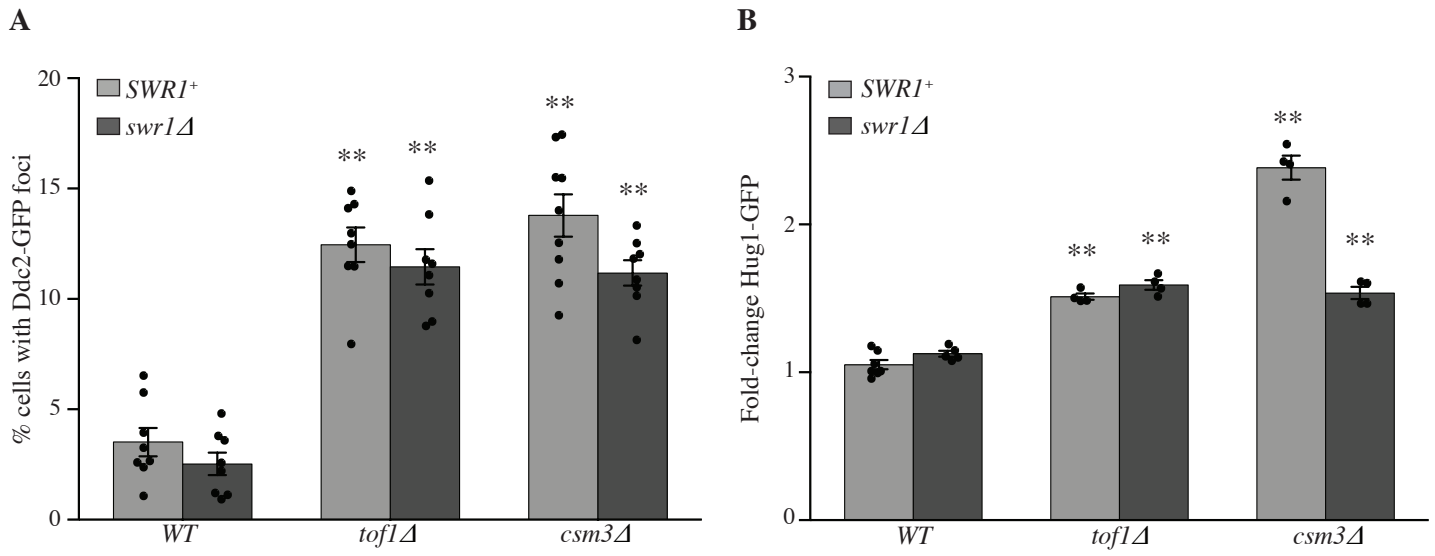

**Supplementary Figure 14. Defects in *Tof1*-*Csm3* cause constitutive DNA-damage**

**checkpoint activation. A.** Distribution of Ddc2-GFP foci in strains with a *tof1Δ* or *csm3Δ*

mutation with or without the *swr1Δ* mutation. **B.** Hug1-GFP induction in strains with a *tof1Δ* or

*csm3Δ* mutation with or without the *swr1Δ* mutation, shown as the fold change in the mean

Hug1-GFP level measured by FACS. The mean fold changes were calculated from at least 2

independent experiments using at least 2 independent isolates for each strain. Individual

observations are shown as dots overlaid on the bar graphs. The error bars represent the standard

error of the mean. Asterisks represent significant differences with respect to the wild-type strain

as follows: \*  $p < 0.005$ , \*\*  $p < 0.0005$  (2-tailed t-test).

Supplementary Figure 15

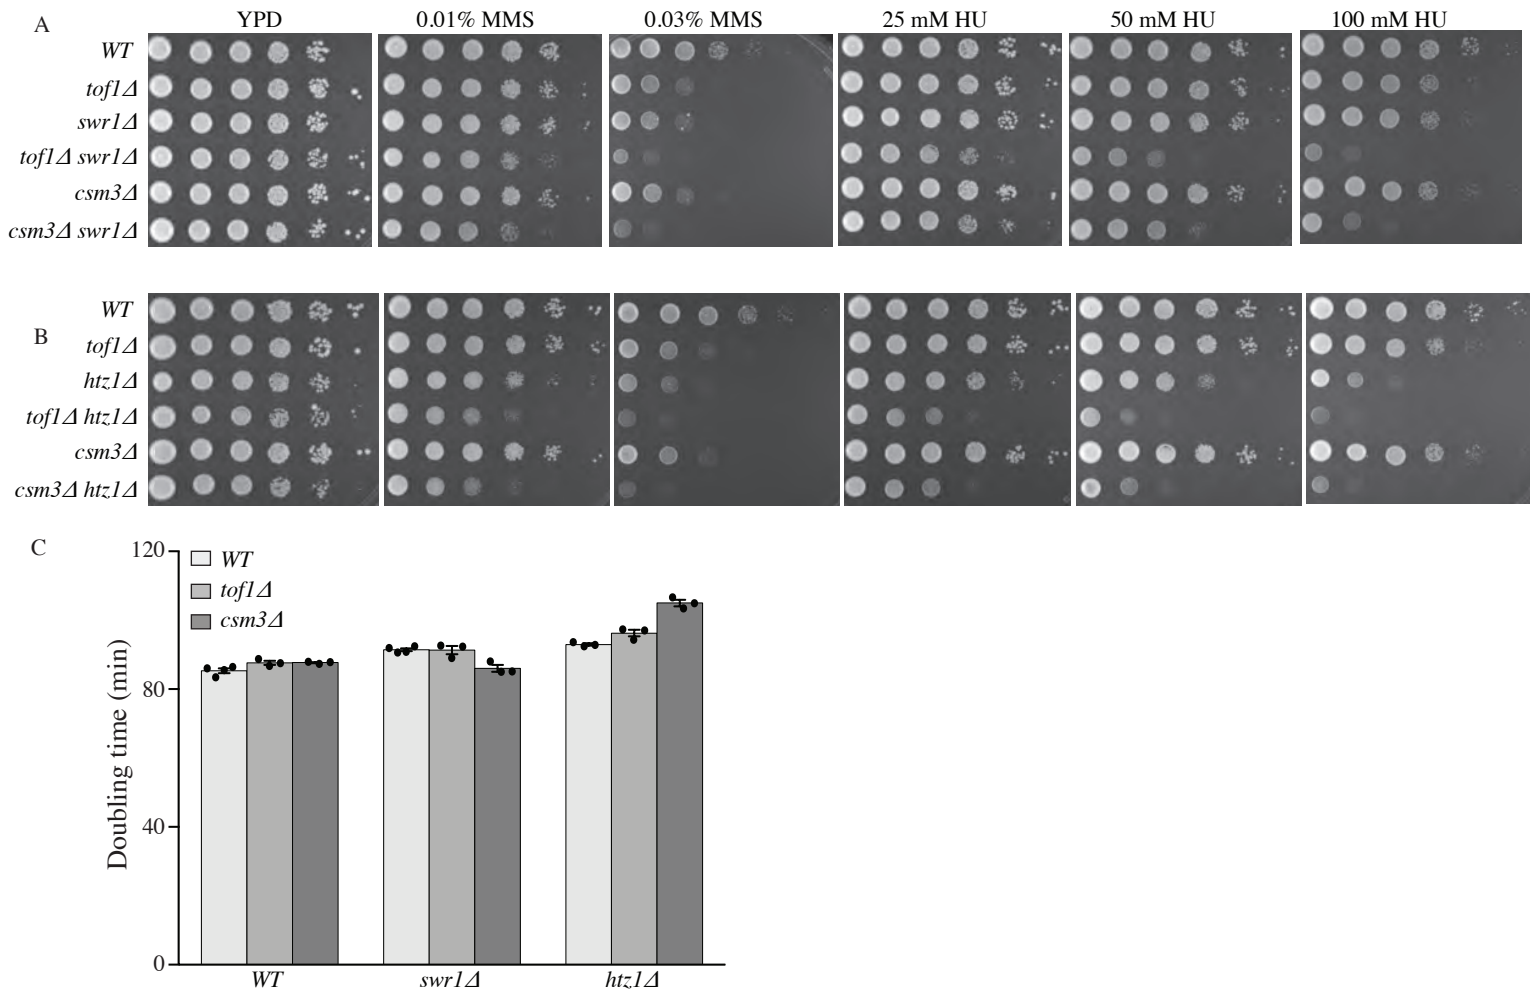

**Supplementary Figure 15. Defects in Tof1-Csm3 and SWR-C/Htz1 cause synergistic sensitivity to replication stress.** **A, B.** Ten-fold serial dilutions of wild-type and mutant strains containing the *tof1Δ* or *csm3Δ* mutation with or without the *swr1Δ* mutation (**A**) or *htz1Δ* mutation (**B**) were plated on media containing 0-0.03% MMS or 0-100 mM HU. Plates were imaged after 2 days of growth at 30°C. **C.** Doubling times of the indicated strains in the absence of DNA-damaging agents. Individual observations as shown as dots overlaid on the bar graphs. The error bars represent the standard error of the mean.

Supplementary Figure 16

A log → G1 → HU (4hr at 28 °C) → release in YPD (at 28 °C)

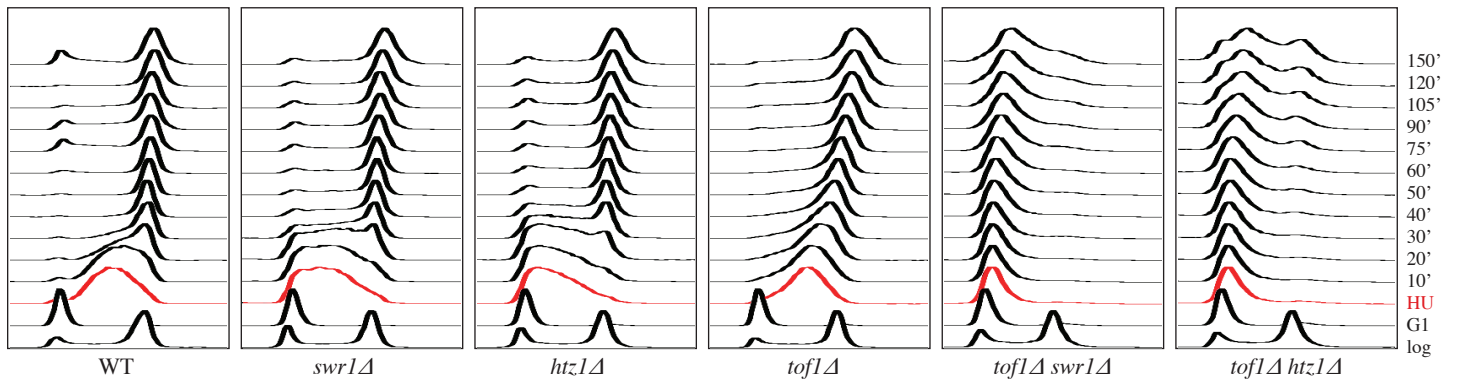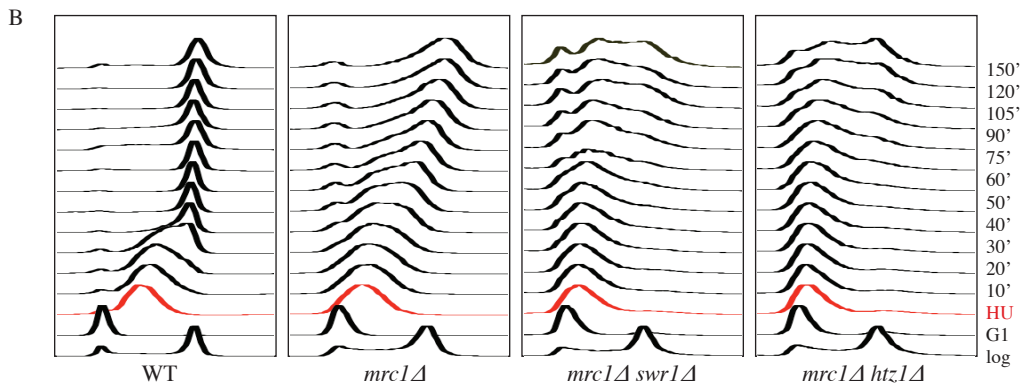

**Supplementary Figure 16. S-phase progression in the presence of HU and after transient HU treatment.** Logarithmically growing cells of the indicated genotypes were arrested in G1 phase, allowed to replicate in the presence of 200 mM HU for 4 hr and then released in normal media. Samples were taken at the indicated time-points for FACS analysis.

Supplementary Figure 17

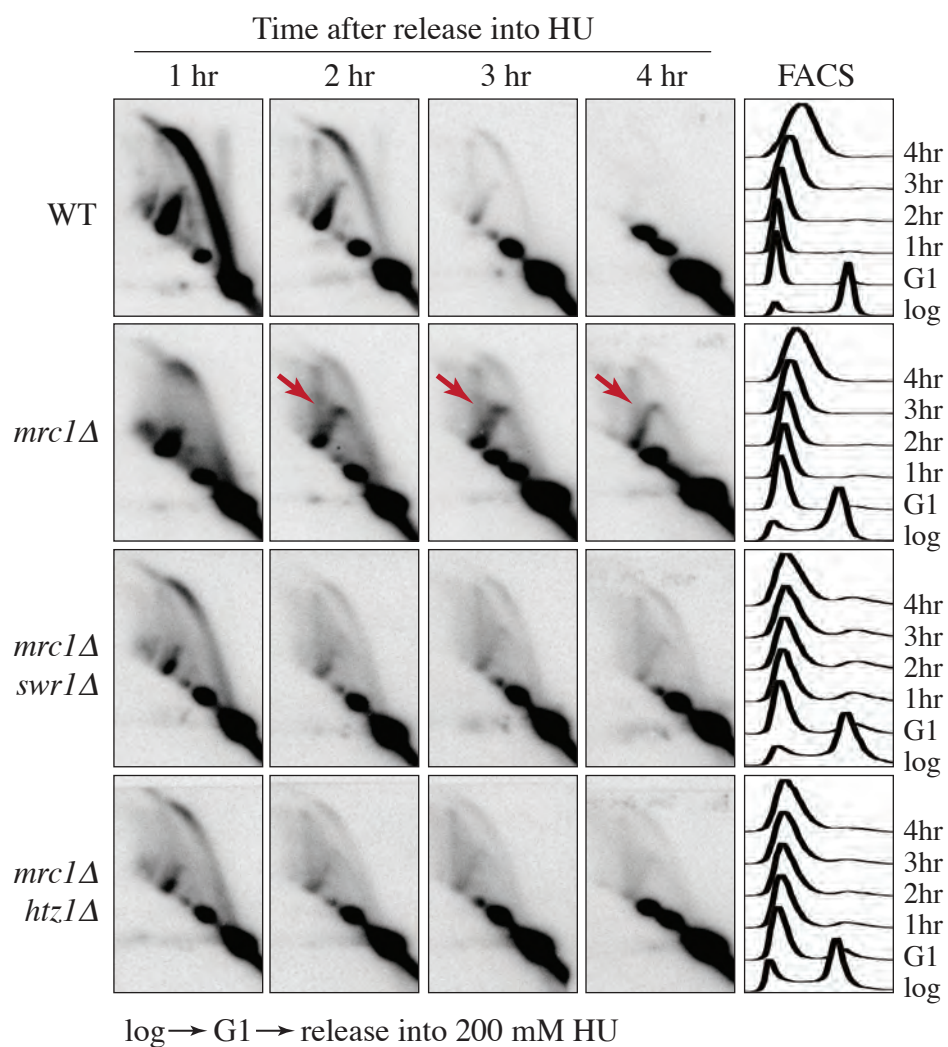

**Supplementary Figure 17. Profile of replication intermediates in *mrc1* strains proficient or deficient in the SWR-C/Htz1.** 2D gels and FACS profiles of strains of the indicated genotype, replicating in the presence of 200 mM HU. The profile of replication intermediates revealed by 2D gels corresponds to the ARS305 region, as in Fig. 5A.



Supplementary Figure 18

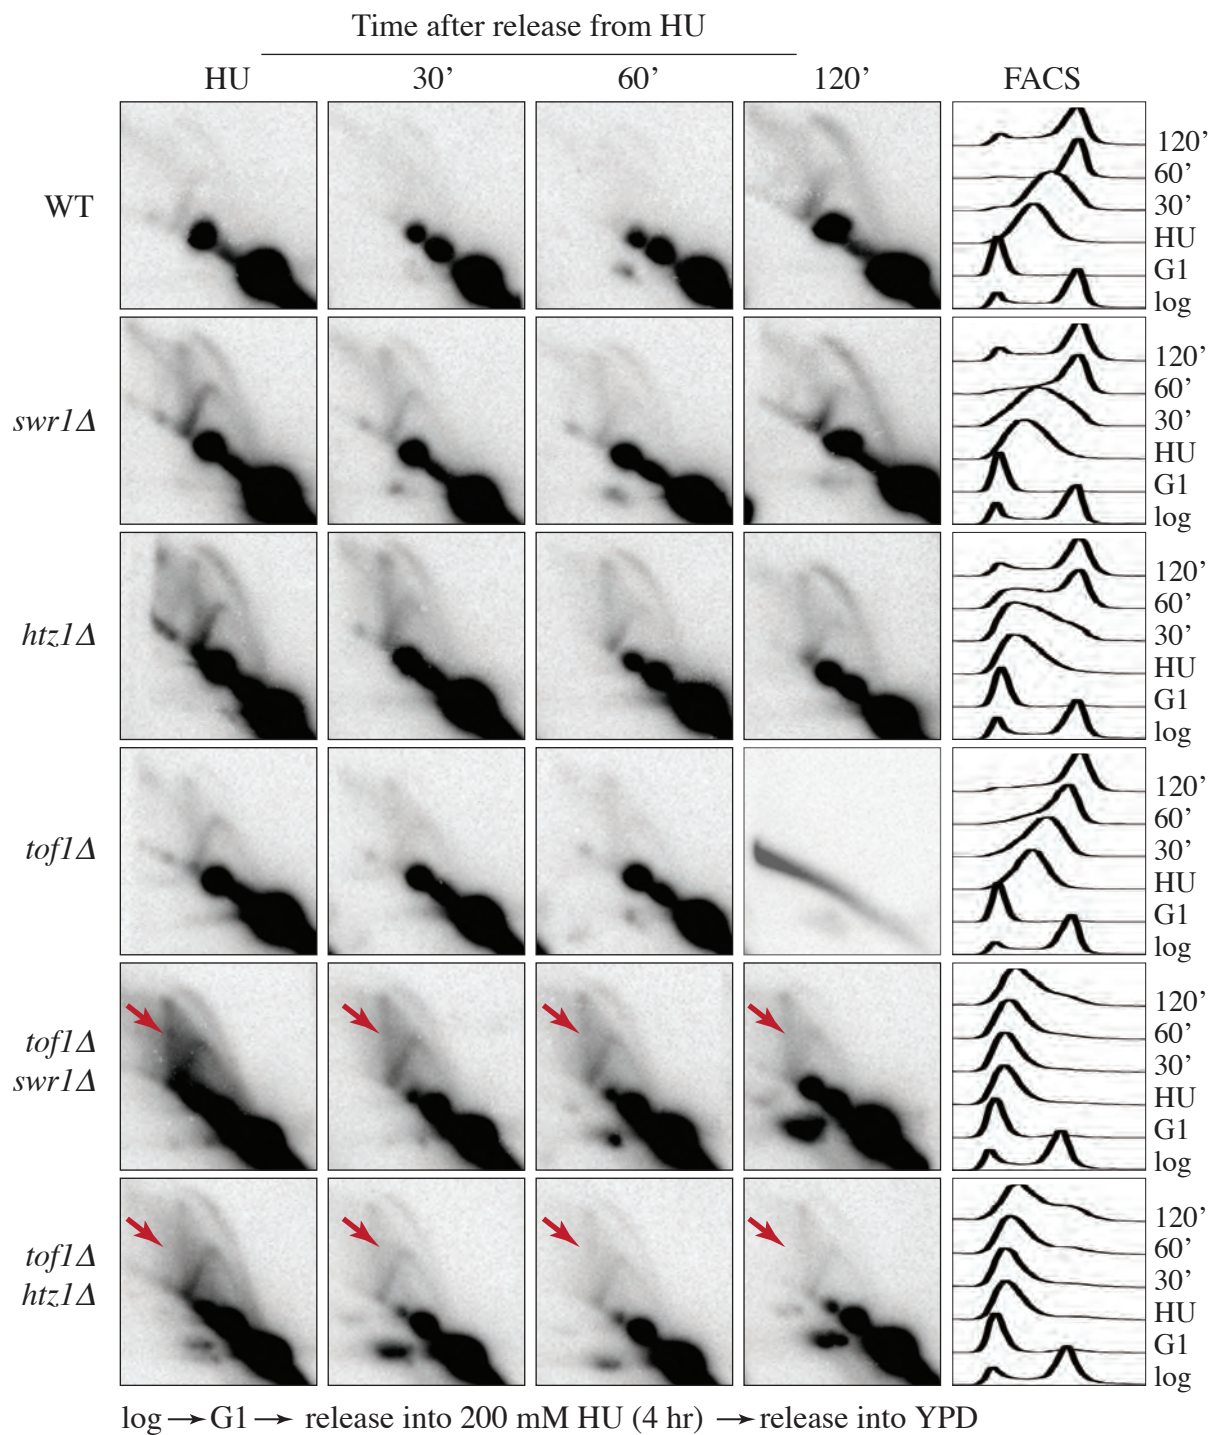

**Supplementary Figure 18. Profile of replication intermediates after release from HU treatment in *tof1* strains proficient or deficient in the SWR-C/Htz1.** 2D gels and FACS profiles of the indicated strains released into normal YPD medium after treatment with 200 mM HU for 4 hours. The profile of replication intermediates revealed by 2D gels corresponds to the ARS305 region as in Fig. 5A.



## Supplementary Figure 19

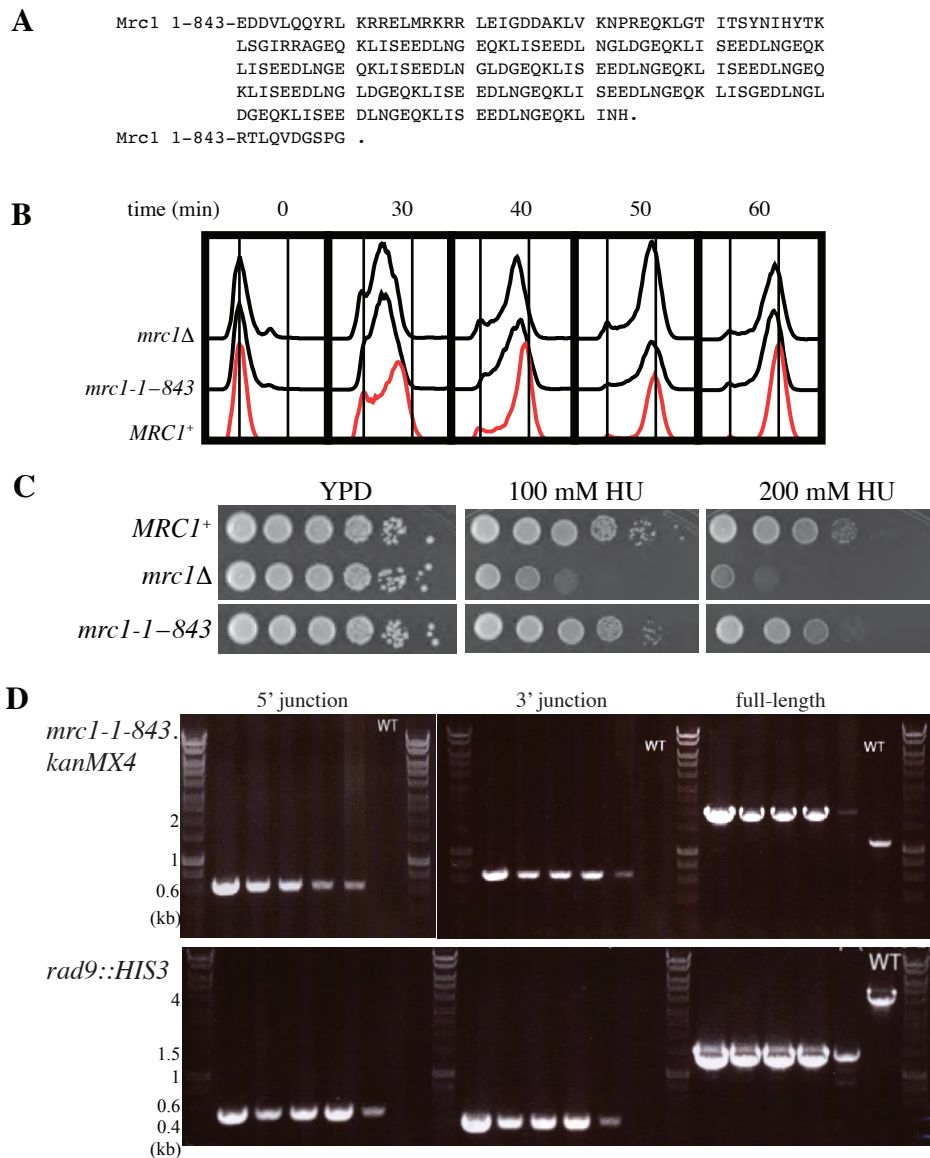

**Supplementary Figure 19. The *mrc1-1-843* truncation is a replication-defective separation-of-function allele.** **A.** Sequences of the previously published Mrc1-c14 mutant protein (upper)<sup>1</sup> and the Mrc1-1-843 construct generated in this study (lower). In each case, the amino acid sequence downstream of Mrc1 amino acid 843 is shown. **B.** Replication profiles of the wild-type (BY4741), *mrc1-1-843* (RDKY9285) and BY4741 *mrc1Δ* (obtained from the BY4741 *MATa* yeast deletion collection) strains after release from alpha-factor-mediated arrest. Log-phase cultures were arrested in G1, released into fresh YPD medium, and samples were taken at the indicated time-points for FACS analysis. **C.** The *mrc1-1-843* mutation does not cause sensitivity to HU. Ten-fold serial dilutions of wild-type (RDKY7635), *mrc1Δ* (RDKY8301), and *mrc1-1-843* (RDKY8967) were plated on YPD and plates containing 100 or 200 mM HU. Plates were imaged after 2 days of growth at 30°C. The white horizontal line indicates the position where images from the same plate were spliced together for clarity. **D.** The *mrc1-1-843* mutation does not cause synthetic lethality when combined with deletion of *RAD9*. Gel images showing the PCR reactions used to verify the *mrc1-1-843* truncation mutation (upper) and the deletion of *RAD9* (lower) in 5 independent isolates containing *mrc1-1-843.kanMX4* and *rad9Δ::HIS3* (RDKY9286-9290). For each isolate, 3 pairs of PCR reactions were performed: one each to verify the 5' (left) and 3' (middle) insertion junctions and a third reaction (right) to amplify across the *kanMX4* insertion site in the *mrc1-1-843.kanMX4* locus or the entire *rad9Δ::HIS3* deletion. A control reaction was performed for all primer pairs using wild-type genomic DNA as a template. The product sizes expected for the 5' junction, 3' junction, and full-length PCRs were 637 bp (0 bp in wild-type), 678 bp (0 bp in wild-type) and 1902 bp (1155 bp in wild-type), respectively, for *mrc1-1-843.kanMX4* and 500 bp (0 bp in wild-type), 396 bp (0 bp in wild-type), and 1467 bp (4143 bp in wild-type), respectively, for *rad9::HIS3*.

**Supplementary Table 1. dGCR rates for strains with single and multiple mutations affecting *MRC1*, *TOF1*, *CSM3*, *SWR1*, and *HTZ1*<sup>^</sup>.**

| Relevant Genotype       | <i>SWR1</i> <sup>+</sup> |                                             |                          | <i>swr1Δ</i> |                            |             |
|-------------------------|--------------------------|---------------------------------------------|--------------------------|--------------|----------------------------|-------------|
|                         | RDKY                     | Rate (x 10 <sup>-8</sup> ) <sup>&amp;</sup> | Fold change <sup>#</sup> | RDKY         | Rate (x 10 <sup>-8</sup> ) | Fold change |
| wild-type               | 7635                     | 8.1 [6.4-15]                                | 1                        | 7785         | 16 [11-34]                 | 2.0         |
| <i>mrc1Δ</i>            | 8301                     | 26 [18-44]                                  | 3.2                      | 8302         | 409 [152-964]              | 50.3        |
| <i>htz1Δ</i>            | 8969                     | 14 [9.9-22]                                 | 1.7                      | 9138         | 14 [11-24]                 | 1.7         |
| <i>mrc1Δ htz1Δ</i>      | 8975                     | 350 [269-456]                               | 43.1                     | 9140         | 246 [163-591]              | 30.3        |
| <i>tof1Δ</i>            | 8963                     | 22 [16-37]                                  | 2.7                      | 8971         | 51 [36-116]                | 6.3         |
| <i>mrc1Δ tof1Δ</i>      | 9141                     | 155 [122-316]                               | 19                       | 9143         | 1080 [542-2180]            | 132.9       |
| <i>mrc1-aq</i>          | 8305                     | 18 [12-34]                                  | 2.2                      | 8306         | 19 [12-43]                 | 2.3         |
| <i>mrc1-aq tof1Δ</i>    | 9145                     | 39 [22-80]                                  | 4.8                      | 9147         | 91 [49-154]                | 11          |
| <i>mrc1-1-843</i>       | 8967                     | 22 [16-30]                                  | 2.7                      | 8973         | 219 [132-341]              | 27          |
| <i>mrc1-1-843 tof1Δ</i> | 9150                     | 158 [123-230]                               | 20                       | 9152         | 1340 [560-1810]            | 164.5       |
| <i>csm3Δ</i>            | 8965                     | 34 [20-76]                                  | 4.2                      | 8972         | 72 [50-95]                 | 8.9         |
| <i>mrc1Δ csm3Δ</i>      | 9154                     | 131 [86-168]                                | 16                       | 9156         | 1730 [978-3360]            | 212.5       |
| <i>mrc1-aq csm3Δ</i>    | 9158                     | 30 [20-112]                                 | 3.7                      | 9160         | 60 [29-153]                | 7.4         |
| <i>mrc1-1-843 csm3Δ</i> | 9163                     | 147 [134-218]                               | 18.0                     | 9166         | 933 [819-4590]             | 115         |

<sup>^</sup> P values for significance calculated using the Mann-Whitney 2-tailed test are presented in Supplementary Data 1.

<sup>&</sup> The numbers in square brackets represent the 95% confidence interval for each rate.

<sup>#</sup> Fold change = fold change with respect to the wild-type dGCR rate.

**Supplementary Table 2. dGCR rates for mutations affecting Htz1 sumoylation, acetylation, and retention in chromatin<sup>^</sup>.**

| Relevant Genotype                 | WT   |                                                 | <i>mrc1Δ</i> |                               | <i>tof1Δ</i> |                               | <i>csn3Δ</i> |                               |
|-----------------------------------|------|-------------------------------------------------|--------------|-------------------------------|--------------|-------------------------------|--------------|-------------------------------|
|                                   | RDKY | Rate<br>(x 10 <sup>-8</sup> ) <sup>&amp;#</sup> | RDKY         | Rate<br>(x 10 <sup>-8</sup> ) | RDKY         | Rate<br>(x 10 <sup>-8</sup> ) | RDKY         | Rate<br>(x 10 <sup>-8</sup> ) |
| <i>HTZ1+</i>                      | 7635 | 8.1 [6.4-15]<br>(1)                             | 8301         | 26 [18-44]<br>(3.2)           | 8963         | 22 [16-37]<br>(2.7)           | 8965         | 34 [20-76]<br>(4.2)           |
| <i>htz1Δ</i>                      | 8969 | 14 [9.9-22]<br>(1.7)                            | 8975         | 350 [269-456] (43)            | 9119         | 105 [48-201] (13)             | 9134         | 90 [59-202] (11)              |
| <i>htz1-K(126,133)R</i>           | 9169 | 8.7 [5.6-12]<br>(1.1)                           | 9171         | 26 [18-50]<br>(3.2)           | 9173         | 23 [22-91]<br>(2.9)           | 9174         | 38 [24-94]<br>(4.7)           |
| <i>htz1-K(4,9,11,15)R</i>         | 9248 | 11 [6.6-21]<br>(1.3)                            | 9256         | 41 [32-54] (5)                |              | n.d.                          |              | n.d.                          |
| <i>htz1-K(4,9,11,15)Q</i>         | 9251 | 6.4 [3.6-16]<br>(0.8)                           | 9258         | 32 [25-36] (4)                |              | n.d.                          |              | n.d.                          |
| <i>htz1-K(4,9,11,15,126,133)R</i> | 9260 | 18 [12-28]<br>(2.2)                             | 9263         | 56 [34-79]<br>(6.9)           |              | n.d.                          |              | n.d.                          |
| <i>htz1-I-114</i>                 | 9265 | 10 [6.9-21]<br>(1.3)                            | 9269         | 240 [162-305] (30)            |              | n.d.                          |              | n.d.                          |
| <i>htz1-I-120</i>                 | 9267 | 10 [6.5-18]<br>(1.2)                            | 9271         | 79 [50-111]<br>(10)           |              | n.d.                          |              | n.d.                          |

<sup>^</sup> P values for significance calculated using the Mann-Whitney 2-tailed test are presented in Supplementary Data 1.

<sup>&</sup> The numbers in square brackets represent the 95% confidence interval for each rate.

<sup>#</sup> The numbers within parentheses represent the fold change in rate with respect to the wild-type rate.

\*The dGCR rate of a strain (RDKY9167) with wild-type *HTZ1* tagged with *HIS3* analogously to the *HIS3*-tagged *htz1* sumoylation, acetylation, and truncation mutants is 9.0 [6.6-18] x 10<sup>-8</sup> (1.1).

**Supplementary Table 3. Statistics for Whole-Genome Sequencing results.**

| Sample  | Relevant Genotype                  | No. Read Pairs             | % Read 1 Mapped | % Read 2 Mapped | No. Uniquely Mapping Read Pairs | Median Intra-Read Pair Distance (bp) | Median Read Depth |
|---------|------------------------------------|----------------------------|-----------------|-----------------|---------------------------------|--------------------------------------|-------------------|
| ASY987  | uGCR wild-type                     | 23,376,079<br>(24,496,086) | 98.12%          | 93.63%          | 19,050,833                      | 298                                  | 178               |
| ASY988  | uGCR wild-type                     | 30,104,520<br>(34,582,188) | 99.40%          | 94.86%          | 25,187,017                      | 414                                  | 239               |
| ASY989  | uGCR wild-type                     | 18,935,568<br>(20,303,221) | 99.31%          | 93.97%          | 15,608,784                      | 348                                  | 141               |
| ASYG281 | uGCR wild-type<br>(from ASY989)    | 17,126,153<br>(18,420,892) | 99.30%          | 93.15%          | 13,866,101                      | 372                                  | 123               |
| ASYG282 | uGCR wild-type<br>(from ASY989)    | 12,424,567<br>(12,927,135) | 99.11%          | 90.73%          | 9,846,983                       | 419                                  | 93                |
| ASYG283 | uGCR wild-type<br>(from ASY989)    | 19,627,703<br>(21,105,027) | 99.06%          | 90.93%          | 15,646,363                      | 416                                  | 149               |
| ASYG284 | uGCR wild-type<br>(from ASY989)    | 16,057,803<br>(16,862,585) | 99.01%          | 92.69%          | 13,015,468                      | 370                                  | 117               |
| ASYG285 | uGCR wild-type<br>(from ASY989)    | 20,722,556<br>(23,455,425) | 99.34%          | 92.35%          | 16,738,649                      | 401                                  | 139               |
| ASYG286 | uGCR wild-type<br>(from ASY989)    | 28,872,532<br>(32,459,697) | 99.09%          | 92.80%          | 23,636,298                      | 342                                  | 213               |
| ASYG287 | uGCR wild-type<br>(from ASY989)    | 31,291,982<br>(37,403,924) | 99.08%          | 93.63%          | 25,938,879                      | 337                                  | 230               |
| ASYG288 | uGCR wild-type<br>(from ASY987)    | 17,920,347<br>(20,922,770) | 99.26%          | 93.91%          | 14,573,648                      | 349                                  | 129               |
| ASYG289 | uGCR wild-type<br>(from ASY987)    | 28,430,642<br>(32,134,880) | 99.34%          | 93.78%          | 23,589,825                      | 362                                  | 224               |
| ASYG291 | uGCR wild-type<br>(from ASY987)    | 18,387,074<br>(19,236,609) | 99.27%          | 93.98%          | 15,352,397                      | 346                                  | 144               |
| ASYG292 | uGCR wild-type<br>(from ASY987)    | 41,478,740<br>(52,132,280) | 99.45%          | 94.57%          | 34,948,818                      | 409                                  | 330               |
| ASYG293 | uGCR wild-type<br>(from ASY987)    | 30,859,997<br>(35,252,546) | 99.40%          | 94.99%          | 26,038,189                      | 390                                  | 249               |
| ASYG294 | uGCR wild-type<br>(from ASY987)    | 218,15,526<br>(23,794,909) | 99.27%          | 94.33%          | 17,986,885                      | 400                                  | 164               |
| ASYG470 | uGCR wild-type<br>(from ASY988)    | 24,572,077<br>(26,199,707) | 99.26%          | 94.90%          | 20,490,971                      | 373                                  | 189               |
| ASYG471 | uGCR wild-type<br>(from ASY988)    | 34,296,268<br>(40,891,308) | 99.47%          | 94.27%          | 28,720,356                      | 435                                  | 273               |
| ASYG472 | uGCR wild-type<br>(from ASY988)    | 28,277,304<br>(31,820,162) | 99.40%          | 94.89%          | 23,858,706                      | 390                                  | 220               |
| ASYG473 | uGCR wild-type<br>(from ASY988)    | 25,038,346<br>(27,784,280) | 99.36%          | 95.32%          | 20,947,262                      | 367                                  | 196               |
| ASYG474 | uGCR wild-type<br>(from ASY988)    | 23,821,750<br>(25,245,187) | 98.84%          | 95.20%          | 19,758,486                      | 326                                  | 177               |
| ASYG475 | uGCR wild-type<br>(from ASY988)    | 21,370,789<br>(22,545,474) | 99.28%          | 96.09%          | 17,857,241                      | 327                                  | 165               |
| ASYG476 | uGCR wild-type<br>(from ASY988)    | 20,661,165<br>(22,175,618) | 99.40%          | 95.93%          | 17,377,040                      | 362                                  | 156               |
| ASY1118 | uGCR <i>swrl</i>                   | 44,704,402<br>(52,521,068) | 99.05%          | 93.93%          | 40,748,537                      | 364                                  | 341               |
| ASY1119 | uGCR <i>swrl</i>                   | 31,892,154<br>(36,536,444) | 99.07%          | 93.22%          | 26,252,341                      | 408                                  | 245               |
| ASY1120 | uGCR <i>swrl</i>                   | 24,071,282<br>(26,346,057) | 98.86%          | 94.27%          | 19,852,334                      | 387                                  | 182               |
| ASYG308 | uGCR <i>swrl</i><br>(from ASY1118) | 32,308,775<br>(37,186,153) | 98.42%          | 91.70%          | 26,047,256                      | 383                                  | 229               |
| ASYG309 | uGCR <i>swrl</i>                   | 18,330,773                 | 97.87%          | 89.83%          | 14,110,468                      | 427                                  | 125               |

|         |                                    |                            |        |        |            |     |     |
|---------|------------------------------------|----------------------------|--------|--------|------------|-----|-----|
|         | (from ASY1118)                     | (19,949,184)               |        |        |            |     |     |
| ASYG310 | uGCR <i>swrl</i><br>(from ASY1118) | 23,209,649<br>(25,397,978) | 98.45% | 91.70% | 18,563,880 | 428 | 168 |
| ASYG311 | uGCR <i>swrl</i><br>(from ASY1118) | 25,269,217<br>(27,475,319) | 97.89% | 91.79% | 20,308,338 | 370 | 189 |
| ASYG312 | uGCR <i>swrl</i><br>(from ASY1118) | 21,984,126<br>(24,362,202) | 98.84% | 92.89% | 17,817,112 | 388 | 160 |
| ASYG313 | uGCR <i>swrl</i><br>(from ASY1118) | 22,685,112<br>(24,279,571) | 99.13% | 93.40% | 18,736,464 | 393 | 176 |
| ASYG314 | uGCR <i>swrl</i><br>(from ASY1119) | 31,184,705<br>(32,776,331) | 98.82% | 94.91% | 26,184,530 | 326 | 243 |
| ASYG315 | uGCR <i>swrl</i><br>(from ASY1119) | 24,784,865<br>(26,404,563) | 99.03% | 94.47% | 20,687,585 | 347 | 189 |
| ASYG316 | uGCR <i>swrl</i><br>(from ASY1119) | 19,342,810<br>(21,791,165) | 99.02% | 93.50% | 15,504,598 | 392 | 136 |
| ASYG317 | uGCR <i>swrl</i><br>(from ASY1119) | 28,261,504<br>(31,299,346) | 98.91% | 94.07% | 23,345,609 | 377 | 215 |
| ASYG318 | uGCR <i>swrl</i><br>(from ASY1119) | 26,190,588<br>(28,900,759) | 98.54% | 92.86% | 21,465,271 | 401 | 192 |
| ASYG484 | uGCR <i>swrl</i><br>(from ASY1120) | 26,940,220<br>(29,168,815) | 98.49% | 93.31% | 22,050,712 | 401 | 208 |
| ASYG485 | uGCR <i>swrl</i><br>(from ASY1120) | 32,899,599<br>(36,420,672) | 98.96% | 93.81% | 27,441,725 | 405 | 246 |
| ASYG486 | uGCR <i>swrl</i><br>(from ASY1120) | 30,633,914<br>(33,057,051) | 98.88% | 95.00% | 25,664,687 | 329 | 233 |
| ASYG487 | uGCR <i>swrl</i><br>(from ASY1120) | 36,057,219<br>(38,915,348) | 98.98% | 95.24% | 30,299,834 | 335 | 285 |
| ASYG488 | uGCR <i>swrl</i><br>(from ASY1120) | 24,971,894<br>(24,971,894) | 97.64% | 93.76% | 19,686,956 | 343 | 184 |
| ASYG489 | uGCR <i>swrl</i><br>(from ASY1120) | 29,507,000<br>(32,170,499) | 98.97% | 95.09% | 24,760,814 | 369 | 229 |
| ASYG490 | uGCR <i>swrl</i><br>(from ASY1120) | 29,336,235<br>(31,724,841) | 99.04% | 94.94% | 24,530,467 | 376 | 226 |
| ASY1112 | uGCR <i>mrc1</i>                   | 25,906,981<br>(28,124,516) | 98.70% | 94.08% | 21,460,558 | 347 | 190 |
| ASY1113 | uGCR <i>mrc1</i>                   | 31,156,000<br>(34,060,558) | 98.90% | 94.43% | 26,181,552 | 332 | 235 |
| ASY1114 | uGCR <i>mrc1</i>                   | 19,700,113<br>(21,139,074) | 98.95% | 94.44% | 16,167,693 | 359 | 139 |
| ASYG295 | uGCR <i>mrc1</i><br>(from ASY1112) | 30,365,528<br>(33,363,371) | 98.74% | 93.83% | 25,593,476 | 348 | 224 |
| ASYG296 | uGCR <i>mrc1</i><br>(from ASY1112) | 24,987,273<br>(26,222,585) | 99.11% | 94.54% | 21,028,483 | 384 | 188 |
| ASYG297 | uGCR <i>mrc1</i><br>(from ASY1112) | 22,228,081<br>(24,585,461) | 99.08% | 93.99% | 18,464,630 | 398 | 163 |
| ASYG298 | uGCR <i>mrc1</i><br>(from ASY1112) | 23,894,055<br>(26,023,966) | 99.07% | 94.15% | 20,003,472 | 398 | 174 |
| ASYG299 | uGCR <i>mrc1</i><br>(from ASY1112) | 24,322,179<br>(26,014,929) | 99.07% | 94.39% | 20,454,848 | 384 | 179 |
| ASYG300 | uGCR <i>mrc1</i><br>(from ASY1112) | 22,873,645<br>(23,934,690) | 98.28% | 93.44% | 18,972,703 | 366 | 169 |
| ASYG301 | uGCR <i>mrc1</i><br>(from ASY1112) | 19,319,261<br>(21,673,803) | 99.15% | 96.16% | 16,131,882 | 338 | 103 |
| ASYG302 | uGCR <i>mrc1</i><br>(from ASY1113) | 23,442,892<br>(25,613,614) | 99.10% | 94.24% | 19,453,428 | 396 | 168 |
| ASYG303 | uGCR <i>mrc1</i><br>(from ASY1113) | 18,901,002<br>(19,727,778) | 99.14% | 94.57% | 15,934,366 | 383 | 135 |
| ASYG304 | uGCR <i>mrc1</i><br>(from ASY1113) | 23,566,390<br>(33,614,488) | 97.57% | 87.69% | 18,062,964 | 267 | 169 |
| ASYG305 | uGCR <i>mrc1</i><br>(from ASY1113) | 18,869,963<br>(25,043,473) | 93.08% | 80.11% | 13,125,113 | 317 | 123 |
| ASYG306 | uGCR <i>mrc1</i><br>(from ASY1113) | 25,491,767<br>(36,914,552) | 95.59% | 85.17% | 18,997,775 | 195 | 175 |

|         |                                         |                            |        |        |            |     |     |
|---------|-----------------------------------------|----------------------------|--------|--------|------------|-----|-----|
| ASYG307 | uGCR <i>mrc1</i><br>(from ASY1113)      | 22,977,152<br>(27,280,208) | 97.15% | 86.31% | 17,756,996 | 370 | 155 |
| ASYG477 | uGCR <i>mrc1</i><br>(from ASY1114)      | (31,488,670)<br>47,020,009 | 96.46% | 87.88% | 24,090,011 | 171 | 220 |
| ASYG478 | uGCR <i>mrc1</i><br>(from ASY1114)      | 17,021,917<br>(20,197,463) | 96.68% | 85.47% | 12,850,489 | 380 | 117 |
| ASYG479 | uGCR <i>mrc1</i><br>(from ASY1114)      | 18,117,222<br>(19,556,363) | 98.91% | 89.87% | 14,501,441 | 391 | 129 |
| ASYG480 | uGCR <i>mrc1</i><br>(from ASY1114)      | 17,825,332<br>(19,467,799) | 98.74% | 89.03% | 14,200,885 | 400 | 125 |
| ASYG481 | uGCR <i>mrc1</i><br>(from ASY1114)      | 18,404,059<br>(19,086,258) | 99.10% | 89.95% | 14,827,287 | 379 | 131 |
| ASYG482 | uGCR <i>mrc1</i><br>(from ASY1114)      | 15,911,684<br>(16,768,127) | 98.98% | 90.71% | 12,806,725 | 381 | 109 |
| ASYG483 | uGCR <i>mrc1</i><br>(from ASY1114)      | 19,731,166<br>(21,910,983) | 99.13% | 89.02% | 15,517,139 | 405 | 137 |
| ASY1202 | uGCR <i>mrc1 swr1</i>                   | 20,187,141<br>(21,935,238) | 99.30% | 95.11% | 16,831,125 | 393 | 143 |
| ASY1203 | uGCR <i>mrc1 swr1</i>                   | 23,147,635<br>(24,599,624) | 99.23% | 95.09% | 19,488,741 | 382 | 157 |
| ASY1204 | uGCR <i>mrc1 swr1</i>                   | 26,231,330<br>(30,112,660) | 99.29% | 94.28% | 22,054,922 | 420 | 186 |
| ASYG319 | uGCR <i>mrc1 swr1</i><br>(from ASY1202) | 18,894,086<br>(20,078,195) | 98.37% | 93.05% | 15,503,966 | 381 | 140 |
| ASYG320 | uGCR <i>mrc1 swr1</i><br>(from ASY1202) | 23,474,939<br>(25,142,429) | 99.03% | 95.20% | 19,838,503 | 363 | 172 |
| ASYG321 | uGCR <i>mrc1 swr1</i><br>(from ASY1202) | 23,371,386<br>(24,322,843) | 99.20% | 95.09% | 19,988,330 | 386 | 175 |
| ASYG322 | uGCR <i>mrc1 swr1</i><br>(from ASY1202) | 21,143,713<br>(26,764,877) | 99.21% | 94.15% | 17,570,103 | 420 | 147 |
| ASYG323 | uGCR <i>mrc1 swr1</i><br>(from ASY1202) | 20,628,010<br>(25,303,427) | 98.81% | 93.14% | 16,970,940 | 419 | 145 |
| ASYG324 | uGCR <i>mrc1 swr1</i><br>(from ASY1202) | 21,169,437<br>(22,018,969) | 99.05% | 94.27% | 17,748,137 | 429 | 158 |
| ASYG325 | uGCR <i>mrc1 swr1</i><br>(from ASY1202) | 13,793,159<br>(14,256,293) | 98.66% | 92.78% | 11,427,573 | 428 | 100 |
| ASYG326 | uGCR <i>mrc1 swr1</i><br>(from ASY1202) | 18,306,956<br>(19,960,761) | 98.85% | 93.27% | 15,270,946 | 420 | 138 |
| ASYG327 | uGCR <i>mrc1 swr1</i><br>(from ASY1203) | 29,768,563<br>(33,728,163) | 99.29% | 95.26% | 25,501,083 | 391 | 234 |
| ASYG328 | uGCR <i>mrc1 swr1</i><br>(from ASY1203) | 22,037,490<br>(22,848,479) | 99.04% | 95.30% | 18,779,033 | 359 | 168 |
| ASYG329 | uGCR <i>mrc1 swr1</i><br>(from ASY1203) | 32,005,773<br>(33,955,557) | 99.38% | 95.66% | 27,344,928 | 365 | 250 |
| ASYG330 | uGCR <i>mrc1 swr1</i><br>(from ASY1203) | 32,929,505<br>(34,769,495) | 99.34% | 96.06% | 28,389,751 | 345 | 253 |
| ASYG331 | uGCR <i>mrc1 swr1</i><br>(from ASY1203) | 22,012,191<br>(23,223,768) | 99.27% | 95.14% | 18,717,169 | 372 | 159 |
| ASYG332 | uGCR <i>mrc1 swr1</i><br>(from ASY1203) | 26,415,686<br>(27,635,712) | 99.29% | 96.38% | 22,811,727 | 338 | 202 |
| ASYG333 | uGCR <i>mrc1 swr1</i><br>(from ASY1203) | 31,654,102<br>(33,309,334) | 99.39% | 95.53% | 27,174,355 | 382 | 241 |
| ASYG547 | uGCR <i>mrc1 swr1</i><br>(from ASY1204) | 27,730,453<br>(31,707,796) | 99.28% | 94.86% | 23,498,772 | 398 | 201 |
| ASYG548 | uGCR <i>mrc1 swr1</i><br>(from ASY1204) | 26,062,351<br>(28,254,234) | 99.46% | 95.86% | 22,351,458 | 375 | 202 |
| ASYG549 | uGCR <i>mrc1 swr1</i><br>(from ASY1204) | 19,475,864<br>(20,248,250) | 99.33% | 95.88% | 16,513,147 | 364 | 145 |
| ASYG550 | uGCR <i>mrc1 swr1</i><br>(from ASY1204) | 22,937,487<br>(23,906,687) | 99.38% | 95.88% | 19,575,957 | 342 | 171 |
| ASYG551 | uGCR <i>mrc1 swr1</i><br>(from ASY1204) | 28,082,532<br>(30,271,895) | 99.21% | 95.49% | 24,040,217 | 362 | 221 |
| ASYG554 | uGCR <i>mrc1 swr1</i>                   | 27,058,220                 | 99.28% | 95.79% | 23,095,220 | 379 | 206 |

|         |                                         |                            |        |        |            |     |     |
|---------|-----------------------------------------|----------------------------|--------|--------|------------|-----|-----|
|         | (from ASY1204)                          | (30,421,857)               |        |        |            |     |     |
| ASYG555 | uGCR <i>mrc1 swr1</i><br>(from ASY1204) | 17,953,909<br>(18,583,766) | 99.40% | 95.78% | 15,270,616 | 381 | 139 |
| ASY566  | sGCR <i>swr1</i>                        | 8,132,022<br>(8,160,288)   | 99.65% | 17.72% | 1,219,615  | 325 | 34  |
| ASYG176 | sGCR <i>swr1</i><br>(from ASY566)       | 6,083,208<br>(6,417,764)   | 99.66% | 18.67% | 1,058,529  | 298 | 24  |
| ASYG178 | sGCR <i>swr1</i><br>(from ASY566)       | 7,840,029<br>(8,305,509)   | 99.65% | 18.66% | 1,371,814  | 282 | 34  |
| ASYG179 | sGCR <i>swr1</i><br>(from ASY566)       | 6,401,948<br>(6,812,554)   | 99.61% | 18.22% | 1,086,278  | 317 | 28  |
| ASYG180 | sGCR <i>swr1</i><br>(from ASY566)       | 6,523,795<br>(6,886,909)   | 99.66% | 18.11% | 1,107,001  | 323 | 29  |
| ASYG261 | sGCR <i>swr1</i><br>(from ASY566)       | 5,534,129<br>(5,890,067)   | 99.70% | 17.79% | 914,939    | 337 | 24  |
| ASYG262 | sGCR <i>swr1</i><br>(from ASY566)       | 8,364,439<br>(8,901,945)   | 99.56% | 18.89% | 1,476,391  | 283 | 37  |
| ASYG271 | sGCR <i>swr1</i><br>(from ASY566)       | 7,743,516<br>(8,214,877)   | 99.67% | 19.12% | 1,387,035  | 279 | 35  |
| ASYG272 | sGCR <i>swr1</i><br>(from ASY566)       | 7,602,776<br>(8,077,050)   | 99.66% | 17.98% | 1,281,728  | 310 | 34  |
| ASYG273 | sGCR <i>swr1</i><br>(from ASY566)       | 6,180,114<br>(6,575,046)   | 99.52% | 18.39% | 1,055,044  | 306 | 26  |
| ASYG274 | sGCR <i>swr1</i><br>(from ASY566)       | 6,546,628<br>(6,919,868)   | 99.63% | 18.61% | 1,136,823  | 308 | 28  |
| ASYG275 | sGCR <i>swr1</i><br>(from ASY566)       | 5,124,147<br>(5,405,300)   | 99.58% | 18.35% | 873,930    | 320 | 22  |
| ASY558  | sGCR <i>mrc1</i>                        | 14,333,092<br>(15,127,144) | 99.37% | 87.40% | 11,165,893 | 324 | 100 |
| ASYG158 | sGCR <i>mrc1</i><br>(from ASY558)       | 16,106,100<br>(16,770,424) | 99.33% | 86.44% | 12,077,980 | 346 | 109 |
| ASYG159 | sGCR <i>mrc1</i><br>(from ASY558)       | 12,357,394<br>(12,460,487) | 99.31% | 86.12% | 9,317,786  | 343 | 78  |
| ASYG160 | sGCR <i>mrc1</i><br>(from ASY558)       | 9,399,184<br>(9,550,774)   | 99.09% | 80.76% | 6,516,200  | 361 | 58  |
| ASYG161 | sGCR <i>mrc1</i><br>(from ASY558)       | 15,649,712<br>(15,823,834) | 99.74% | 85.93% | 12,285,214 | 305 | 99  |
| ASYG162 | sGCR <i>mrc1</i><br>(from ASY558)       | 15,274,592<br>(15,481,627) | 99.76% | 86.36% | 11,898,470 | 305 | 98  |
| ASYG163 | sGCR <i>mrc1</i><br>(from ASY558)       | 15,602,016<br>(15,781,092) | 99.75% | 85.81% | 12,068,700 | 307 | 105 |
| ASYG164 | sGCR <i>mrc1</i><br>(from ASY558)       | 18,501,076<br>(18,873,712) | 99.75% | 86.22% | 14,464,523 | 304 | 126 |
| ASYG266 | sGCR <i>mrc1</i><br>(from ASY558)       | 17,399,408<br>(17,641,092) | 99.75% | 85.32% | 13,578,075 | 296 | 117 |
| ASYG267 | sGCR <i>mrc1</i><br>(from ASY558)       | 17,320,966<br>(17,532,548) | 99.70% | 85.98% | 13,442,946 | 288 | 121 |
| ASYG268 | sGCR <i>mrc1</i><br>(from ASY558)       | 18,536,042<br>(18,834,645) | 99.71% | 86.29% | 14,395,392 | 298 | 128 |
| ASYG269 | sGCR <i>mrc1</i><br>(from ASY558)       | 16,614,439<br>(16,889,090) | 99.69% | 85.53% | 12,814,861 | 302 | 114 |
| ASY639  | sGCR <i>mrc1-1-843</i>                  | 16,598,566<br>(17,132,570) | 99.66% | 94.86% | 13,656,572 | 318 | 117 |
| ASYG187 | sGCR <i>mrc1-1-843</i><br>(from ASY639) | 17,363,334<br>(18,202,096) | 99.57% | 94.78% | 14,357,597 | 323 | 122 |
| ASYG188 | sGCR <i>mrc1-1-843</i><br>(from ASY639) | 16,970,060<br>(17,373,928) | 99.48% | 95.81% | 14,291,186 | 311 | 124 |
| ASYG189 | sGCR <i>mrc1-1-843</i><br>(from ASY639) | 20,364,927<br>(23,974,334) | 99.57% | 94.55% | 16,667,128 | 340 | 137 |
| ASYG190 | sGCR <i>mrc1-1-843</i><br>(from ASY639) | 15,444,735<br>(15,863,721) | 99.49% | 96.11% | 12,879,723 | 285 | 103 |
| ASYG191 | sGCR <i>mrc1-1-843</i><br>(from ASY639) | 14,922,403<br>(15,259,055) | 99.63% | 95.12% | 12,451,784 | 324 | 103 |

|         |                                              |                            |        |        |            |     |     |
|---------|----------------------------------------------|----------------------------|--------|--------|------------|-----|-----|
| ASYG263 | sGCR <i>mrc1-1-843</i><br>(from ASY639)      | 15,739,640<br>(16,182,665) | 99.26% | 96.79% | 13,292,124 | 227 | 106 |
| ASYG264 | sGCR <i>mrc1-1-843</i><br>(from ASY639)      | 15,336,826<br>(15,851,380) | 99.44% | 96.57% | 12,908,815 | 203 | 102 |
| ASYG276 | sGCR <i>mrc1-1-843</i><br>(from ASY639)      | 14,882,008<br>(15,255,734) | 99.54% | 95.93% | 12,356,206 | 268 | 103 |
| ASYG277 | sGCR <i>mrc1-1-843</i><br>(from ASY639)      | 13,516,114<br>(13,817,350) | 99.39% | 96.18% | 11,373,699 | 224 | 95  |
| ASYG278 | sGCR <i>mrc1-1-843</i><br>(from ASY639)      | 15,305,197<br>(15,608,735) | 99.55% | 95.41% | 12,860,362 | 323 | 104 |
| ASYG279 | sGCR <i>mrc1-1-843</i><br>(from ASY639)      | 13,327,796<br>(13,594,348) | 99.49% | 95.55% | 11,171,737 | 316 | 90  |
| ASY749  | sGCR <i>mrc1 swr1</i>                        | 16,019,761<br>(16,297,017) | 98.84% | 75.29% | 11,417,214 | 334 | 103 |
| ASYG230 | sGCR <i>mrc1 swr1</i><br>(from ASY749)       | 22,341,396<br>(23,145,370) | 96.71% | 76.18% | 15,631,724 | 340 | 142 |
| ASYG231 | sGCR <i>mrc1 swr1</i><br>(from ASY749)       | 16,810,296<br>(19,049,178) | 96.90% | 81.85% | 11,765,989 | 307 | 67  |
| ASYG232 | sGCR <i>mrc1 swr1</i><br>(from ASY749)       | 18,379,715<br>(18,999,395) | 98.60% | 82.50% | 13,763,311 | 309 | 124 |
| ASYG233 | sGCR <i>mrc1 swr1</i><br>(from ASY749)       | 24,416,574<br>(25,847,204) | 98.72% | 85.22% | 18,692,689 | 278 | 176 |
| ASYG234 | sGCR <i>mrc1 swr1</i><br>(from ASY749)       | 29,110,586<br>(29,988,422) | 99.19% | 83.72% | 22,436,223 | 294 | 202 |
| ASYG235 | sGCR <i>mrc1 swr1</i><br>(from ASY749)       | 26,066,871<br>(26,687,664) | 99.11% | 81.22% | 19,321,575 | 317 | 181 |
| ASYG236 | sGCR <i>mrc1 swr1</i><br>(from ASY749)       | 18,536,267<br>(18,829,756) | 98.68% | 81.49% | 13,972,877 | 316 | 129 |
| ASYG237 | sGCR <i>mrc1 swr1</i><br>(from ASY749)       | 25,489,689<br>(26,256,946) | 98.76% | 80.41% | 18,953,624 | 323 | 169 |
| ASYG238 | sGCR <i>mrc1 swr1</i><br>(from ASY749)       | 25,154,023<br>(25,793,412) | 98.97% | 81.84% | 19,026,698 | 313 | 166 |
| ASYG239 | sGCR <i>mrc1 swr1</i><br>(from ASY749)       | 24,159,794<br>(24,619,315) | 98.88% | 83.17% | 18,733,120 | 283 | 168 |
| ASYG240 | sGCR <i>mrc1 swr1</i><br>(from ASY749)       | 25,459,051<br>(26,194,764) | 99.09% | 80.29% | 18,900,653 | 315 | 169 |
| ASY746  | sGCR <i>mrc1-1-843 swr1</i>                  | 18,906,039<br>(19,253,813) | 98.94% | 82.72% | 14,242,860 | 320 | 128 |
| ASYG200 | sGCR <i>mrc1-1-843 swr1</i><br>(from ASY746) | 36,698,543<br>(39,470,655) | 99.13% | 80.54% | 26,469,373 | 356 | 248 |
| ASYG201 | sGCR <i>mrc1-1-843 swr1</i><br>(from ASY746) | 20,837,549<br>(22,366,357) | 99.06% | 79.59% | 14,582,871 | 368 | 125 |
| ASYG202 | sGCR <i>mrc1-1-843 swr1</i><br>(from ASY746) | 31,777,246<br>(32,625,570) | 99.13% | 85.97% | 24,865,119 | 308 | 238 |
| ASYG203 | sGCR <i>mrc1-1-843 swr1</i><br>(from ASY746) | 22,370,717<br>(24,006,033) | 99.05% | 82.47% | 16,309,000 | 341 | 151 |
| ASYG204 | sGCR <i>mrc1-1-843 swr1</i><br>(from ASY746) | 37,884,998<br>(38,997,141) | 99.20% | 84.46% | 29,065,296 | 323 | 269 |
| ASYG205 | sGCR <i>mrc1-1-843 swr1</i><br>(from ASY746) | 33,478,896<br>(34,669,412) | 99.11% | 84.37% | 25,261,235 | 327 | 237 |
| ASYG206 | sGCR <i>mrc1-1-843 swr1</i><br>(from ASY746) | 21,088,276<br>(21,416,385) | 99.14% | 84.36% | 16,177,114 | 331 | 145 |
| ASYG208 | sGCR <i>mrc1-1-843 swr1</i><br>(from ASY746) | 24,020,049<br>(24,702,758) | 99.10% | 83.73% | 18,102,267 | 322 | 166 |
| ASYG209 | sGCR <i>mrc1-1-843</i>                       | 20,749,491                 | 98.91% | 86.04% | 16,212,667 | 275 | 145 |



|         |                                                        |                            |        |        |            |     |     |
|---------|--------------------------------------------------------|----------------------------|--------|--------|------------|-----|-----|
|         | <i>swr1</i><br>(from ASY746)                           | (21,113,394)               |        |        |            |     |     |
| ASYG210 | sGCR <i>mrc1-1-843</i><br><i>swr1</i><br>(from ASY746) | 26,864,647<br>(27,600,826) | 99.09% | 85.78% | 20,886,454 | 301 | 177 |

Numbers in parentheses indicate the number of read pairs prior to culling PCR duplicates. Reads were 50 bases long.

Median read depth is the median number of times that each base in uniquely mapping regions of the nuclear genome was present within a read.

**Supplementary Table 4. GCR structures for Can<sup>a</sup> 5FOA<sup>a</sup> isolates from the uGCR assay with sequenced genomes.**

| Sample (Relevant genotype) | GCR description                                                                                                                   | GCR Junction Evidence                                                                                                                |
|----------------------------|-----------------------------------------------------------------------------------------------------------------------------------|--------------------------------------------------------------------------------------------------------------------------------------|
| ASYG281 (wild-type)        | Hairpin-mediated inverted duplication on chr V L (hairpin inside <i>NAT</i> at <i>can1::P<sub>ura2</sub>-NAT</i> , 36-base loop)  | Copy number (Supplementary Fig. 3b)<br>Junction sequence (17 reads; Supplementary Fig. 12D)                                          |
|                            | Homology-mediated translocation between chr V L <i>YELWdelta1/2</i> and chr V L <i>YELCdelta4</i>                                 | Copy number (Supplementary Fig. 3b)<br>Discordant read pairs (6 read pairs)                                                          |
|                            | Homology-mediated translocation between chr V L <i>IMT4</i> and chr X R <i>IMT3</i>                                               | Copy number (Supplementary Fig. 3b)<br>Discordant read pairs (205 read pairs)                                                        |
| ASYG282 (wild-type)        | <i>de novo</i> telomere addition on chr V L at 34,800 bp (inside <i>NPR2</i> )                                                    | Copy number (Supplementary Fig. 3a)<br>Junction sequence (16 reads; Supplementary Fig. 3a)                                           |
| ASYG283 (wild-type)        | <i>de novo</i> telomere addition on chr V L at 34,872 bp (inside <i>NPR2</i> )                                                    | Copy number (Supplementary Fig. 3a)<br>Junction sequence (54 reads; Supplementary Fig. 3a)                                           |
| ASYG284 (wild-type)        | <i>de novo</i> telomere addition on chr V L at 39,748 bp                                                                          | Copy number (Supplementary Fig. 3a)<br>Junction sequence (18 reads; Supplementary Fig. 3a)                                           |
| ASYG285 (wild-type)        | <i>de novo</i> telomere addition on chr V L at 26,384 bp (inside <i>YEL067C</i> )                                                 | Copy number (Supplementary Fig. 3a)<br>Junction sequence (56 reads; Supplementary Fig. 3a)                                           |
| ASYG286 (wild-type)        | <i>de novo</i> telomere addition on chr V L at 34,850 bp (inside <i>NPR2</i> )                                                    | Copy number (Supplementary Fig. 3a)<br>Junction sequence (43 reads; Supplementary Fig. 3a)                                           |
| ASYG287 (wild-type)        | Hairpin-mediated inverted duplication on chr V L (hairpin inside <i>NAT</i> at <i>can1::P<sub>ura2</sub>-NAT</i> , 135-base loop) | Copy number (Supplementary Fig. 3b)<br>Discordant read pairs (72 read pairs)<br>Junction sequence (52 reads; Supplementary Fig. 12D) |
|                            | Homology-mediated translocation between chr V L <i>YELCdelta4</i> and chr V R <i>YERCdelta14</i>                                  | Copy number (Supplementary Fig. 3b)<br>Discordant read pairs (23 read pairs)                                                         |
| ASYG288 (wild-type)        | Hairpin-mediated inverted duplication on chr V L (hairpin inside <i>NAT</i> at <i>can1::P<sub>ura2</sub>-NAT</i> , 22-base loop)  | Copy number (Supplementary Fig. 3b)<br>Junction sequence (9 reads; Supplementary Fig. 12E)                                           |
|                            | Homology-mediated translocation between chr V L <i>PAU2</i> and chr I R <i>PAU8</i>                                               | Copy number (Supplementary Fig. 3b)<br>Discordant read pairs (31 read pairs)                                                         |
| ASYG289 (wild-type)        | <i>de novo</i> telomere addition on chr V L at 34,842 bp (inside <i>NPR2</i> )                                                    | Copy number (Supplementary Fig. 3a)<br>Junction sequence (130 reads; Supplementary Fig. 3a)                                          |
| ASYG291 (wild-type)        | <i>de novo</i> telomere addition on chr V L at 34,845 bp (inside <i>NPR2</i> )                                                    | Copy number (Supplementary Fig. 3a)<br>Junction sequence (56 reads; Supplementary Fig. 3a)                                           |
| ASYG292 (wild-type)        | <i>de novo</i> telomere addition on chr V L at 34,849 bp (inside <i>NPR2</i> )                                                    | Copy number (Supplementary Fig. 3a)<br>Junction sequence (196 reads; Supplementary Fig. 3a)                                          |
| ASYG293 (wild-type)        | <i>de novo</i> telomere addition on chr V L at 34,835 bp (inside <i>NPR2</i> )                                                    | Copy number (Supplementary Fig. 3a)<br>Junction sequence (71 reads; Supplementary Fig. 3a)                                           |
| ASYG294 (wild-type)        | <i>de novo</i> telomere addition on chr V L inside <i>NAT</i> at <i>can1::P<sub>ura2</sub>-NAT</i>                                | Copy number (Supplementary Fig. 3a)<br>Junction sequence (16 reads; Supplementary Fig. 3a)                                           |
| ASYG470 (wild-type)        | <i>de novo</i> telomere addition on chr V L at 26,524 bp inside <i>YEL067C</i>                                                    | Copy number (Supplementary Fig. 3a)<br>Junction sequence (28 reads; Supplementary Fig. 3a)                                           |
| ASYG471 (wild-type)        | No GCR; point mutations inside <i>CAN1</i> (c.1000G>C, GGC->CGC, p.334G>R) and <i>URA3</i> (c.179C>A, ACA->AAA, p.60T>K)          | Genome sequence                                                                                                                      |
| ASYG472 (wild-type)        | <i>de novo</i> telomere addition on chr V L at 35,574 bp inside <i>NPR2</i>                                                       | Copy number (Supplementary Fig. 3a)<br>Junction sequence (47 reads;                                                                  |

|                            |                                                                                                                                                                                                                             |                                                                                                                                          |
|----------------------------|-----------------------------------------------------------------------------------------------------------------------------------------------------------------------------------------------------------------------------|------------------------------------------------------------------------------------------------------------------------------------------|
|                            |                                                                                                                                                                                                                             | Supplementary Fig. 3a)                                                                                                                   |
| ASYG473<br>(wild-type)     | <i>de novo</i> telomere addition on chr V L at 26,386 bp inside <i>YEL067C</i>                                                                                                                                              | Copy number (Supplementary Fig. 3a)<br>Junction sequence (84 reads;<br>Supplementary Fig. 3a)                                            |
| ASYG474<br>(wild-type)     | <i>de novo</i> telomere addition on chr V L at 26,931 bp inside <i>HPA3</i>                                                                                                                                                 | Copy number (Supplementary Fig. 3a)<br>Junction sequence (35 reads;<br>Supplementary Fig. 3a)                                            |
| ASYG475<br>(wild-type)     | Interstitial deletion from 21,011 bp (inside <i>DSFI</i> ) to 40,300 bp, 8 bp microhomology                                                                                                                                 | Copy number (Supplementary Fig. 3b)<br>Junction sequence (61 reads;<br>Supplementary Fig. 3b)                                            |
| ASYG476<br>(wild-type)     | <i>de novo</i> telomere addition on chr V L at 27,780 bp inside <i>SITI</i>                                                                                                                                                 | Copy number (Supplementary Fig. 3a)<br>Junction sequence (54 reads;<br>Supplementary Fig. 3a)                                            |
| ASYG308<br>( <i>swr1</i> ) | Hairpin-mediated inverted duplication on chr V L (hairpin inside <i>NAT</i> at <i>can1::P<sub>nat</sub>-NAT</i> , 36-base loop)                                                                                             | Copy number (Supplementary Fig. 4b)<br>Junction sequence (6 reads; Supplementary Fig. 12G)                                               |
|                            | Homology-mediated translocation between chr V L <i>YELCdelta4</i> and chr II L <i>YBLWdelta2</i>                                                                                                                            | Copy number (Supplementary Fig. 4b)<br>Discordant read pairs (66 read pairs)                                                             |
| ASYG309<br>( <i>swr1</i> ) | Microhomology-containing translocation between chr V L (42,293 bp) and chr XIII L (141,052 bp, inside <i>SMA2</i> ) with 2 bp microhomology                                                                                 | Copy number (Supplementary Fig. 4b)<br>Discordant read pairs (353 read pairs)<br>Junction sequence (96 reads)                            |
| ASYG310<br>( <i>swr1</i> ) | Hairpin-mediated inverted duplication on chr V L (hairpin inside <i>NPR2</i> , 12 base loop)                                                                                                                                | Copy number (Supplementary Fig. 4b)<br>Discordant read pairs (51 read pairs)<br>Junction sequence (41 reads)                             |
|                            | Homology-mediated translocation between chr V L <i>YELWdelta1/YELWdelta2</i> and chr V R “ <i>YERWdelta27</i> ”, an unannotated delta at chrV:449,322-449,631                                                               | Copy number (Supplementary Fig. 4b)<br>Discordant read pairs (52 read pairs)                                                             |
| ASYG311<br>( <i>swr1</i> ) | Interstitial deletion on chr V L from 20,497 bp (inside <i>DSFI</i> ) – 36,162 bp (inside <i>NPR2</i> ) with 5 bp microhomology                                                                                             | Copy number (Supplementary Fig. 4a)<br>Junction sequence (29 reads;<br>Supplementary Fig. 4a)                                            |
| ASYG312<br>( <i>swr1</i> ) | Microhomology-containing translocation between chr V L (36,578 bp) and an unidentified full-length Ty                                                                                                                       | Copy number (Supplementary Fig. 4b)<br>Junction sequence                                                                                 |
|                            | Homology-mediated translocation between a Ty element and chr III R <i>YCRWdelta8, 9, or 10</i>                                                                                                                              | Copy number (Supplementary Fig. 4b)                                                                                                      |
| ASYG313<br>( <i>swr1</i> ) | <i>de novo</i> telomere addition on chr V L at 29,943 bp inside <i>AVT2</i>                                                                                                                                                 | Copy number (Supplementary Fig. 4a)<br>Junction sequence (59 reads;<br>Supplementary Fig. 4a)                                            |
| ASYG314<br>( <i>swr1</i> ) | Interstitial deletion on chr V L from 15,497 bp to 32,566 bp inside <i>CAN1</i> at <i>yel068c::CAN1-URA3</i>                                                                                                                | Copy number (Supplementary Fig. 4a)<br>Discordant read pairs (663 read pairs)<br>Junction sequence (169 reads;<br>Supplementary Fig. 4a) |
| ASYG315<br>( <i>swr1</i> ) | <i>de novo</i> telomere addition on chr V L at 34,845 bp inside <i>NPR2</i>                                                                                                                                                 | Copy number (Supplementary Fig. 4a)<br>Junction sequence (46 reads;<br>Supplementary Fig. 4a)                                            |
| ASYG316<br>( <i>swr1</i> ) | Hairpin-mediated inverted duplication on chr V L (hairpin inside <i>PRB1</i> , 25 base loop)                                                                                                                                | Copy number (Supplementary Fig. 4b)<br>Discordant read pairs (78 read pairs)<br>Junction sequence (116 reads;<br>Supplementary Fig. 12G) |
|                            | <i>de novo</i> telomere addition at 83,912 bp inside <i>ANPI</i> on chr V L                                                                                                                                                 | Copy number (Supplementary Fig. 4b)<br>Junction sequence (190 reads;<br>Supplementary Fig. 4b)                                           |
| ASYG317<br>( <i>swr1</i> ) | Hairpin-mediated inverted duplication on chr V L (hairpin inside <i>NAT</i> at <i>can1::P<sub>nat</sub>-NAT</i> , 254 base loop)                                                                                            | Copy number (Supplementary Fig. 4b)<br>Junction sequence (9 reads; Supplementary Fig. 12H)                                               |
|                            | Homology-mediated translocation between chr V L <i>PAU2</i> and either chr IX-L <i>PAU14</i> or chr X-L <i>PAU1</i> ; sequences from telomere to <i>PAU1/PAU14</i> are identical, hence the junction is not distinguishable | Copy number (Supplementary Fig. 4b)<br>Junction sequence                                                                                 |
| ASYG318<br>( <i>swr1</i> ) | Microhomology-containing translocation between chr V L (25,840 bp in <i>YEL068C</i> at <i>yel068c::CAN1-URA3</i> ) and chr IV R (903,251 bp inside <i>RAD9</i> ) with 12 bp of imperfect microhomology (11/12 bp)           | Copy number (Supplementary Fig. 4b)<br>Discordant read pairs (679 read pairs)<br>Junction sequence (89 reads)                            |
| ASYG484                    | <i>de novo</i> telomere addition on chr V L at 34,421 bp inside <i>NPR2</i>                                                                                                                                                 | Copy number (Supplementary Fig. 4a)                                                                                                      |

|                            |                                                                                                                                                                                                                                                                                                 |                                                                                                                                        |
|----------------------------|-------------------------------------------------------------------------------------------------------------------------------------------------------------------------------------------------------------------------------------------------------------------------------------------------|----------------------------------------------------------------------------------------------------------------------------------------|
| ( <i>swr1</i> )            |                                                                                                                                                                                                                                                                                                 | Junction sequence (19 reads; Supplementary Fig. 4a)                                                                                    |
| ASYG485<br>( <i>swr1</i> ) | Hairpin-mediated inverted duplication on chr V L (hairpin inside <i>NAT</i> at <i>can1::P<sub>LEU2</sub>-NAT</i> , 130-base loop)                                                                                                                                                               | Copy number (Supplementary Fig. 4b)<br>Discordant read pairs (96 read pairs)<br>Junction sequence (95 reads; Supplementary Fig. 12J)   |
|                            | Homology-mediated translocation between chr V L <i>tR(UCU)E</i> and chr XI L <i>tR(UCU)K</i>                                                                                                                                                                                                    | Copy number (Supplementary Fig. 4b)<br>Discordant read pairs (544 read pairs)                                                          |
| ASYG486<br>( <i>swr1</i> ) | <i>de novo</i> telomere addition on chr V L inside <i>NAT</i> at <i>can1::P<sub>LEU2</sub>-NAT</i>                                                                                                                                                                                              | Copy number (Supplementary Fig. 4a)<br>Junction sequence (56 reads; Supplementary Fig. 4a)                                             |
| ASYG487<br>( <i>swr1</i> ) | <i>de novo</i> telomere addition on chr V L at 34,831 bp inside <i>NPR2</i>                                                                                                                                                                                                                     | Copy number (Supplementary Fig. 4a)<br>Junction sequence (57 reads; Supplementary Fig. 4a)                                             |
| ASYG488<br>( <i>swr1</i> ) | <i>de novo</i> telomere addition on chr V L at 34,831 bp inside <i>NPR2</i>                                                                                                                                                                                                                     | Copy number (Supplementary Fig. 4a)<br>Junction sequence (61 reads; Supplementary Fig. 4a)                                             |
| ASYG489<br>( <i>swr1</i> ) | <i>de novo</i> telomere addition on chr V L at 91,326 bp in <i>P<sub>LEU2</sub></i> in <i>can1::P<sub>LEU2</sub>-NAT</i>                                                                                                                                                                        | Copy number (Supplementary Fig. 4a)<br>Junction sequence (35 reads; Supplementary Fig. 4a)                                             |
| ASYG490<br>( <i>swr1</i> ) | Hairpin-mediated inverted duplication on chr V L (hairpin inside <i>NAT</i> at <i>can1::P<sub>LEU2</sub>-NAT</i> , 298-base loop)                                                                                                                                                               | Copy number (Supplementary Fig. 4b)<br>Junction sequence (7 reads; Supplementary Fig. 12J)                                             |
|                            | Homology-mediated translocation between chr V L <i>YELWdelta6</i> and chr XV L <i>YOLCdelta1</i>                                                                                                                                                                                                | Copy number (Supplementary Fig. 4b)<br>Discordant read pairs (347 read pairs)                                                          |
| ASYG295<br>( <i>mrc1</i> ) | Hairpin-mediated inverted duplication on chr V L (hairpin inside <i>NPR2</i> , 269-base loop) followed by whole-chromosome duplication                                                                                                                                                          | Copy number (Supplementary Fig. 5a)<br>Discordant read pairs (469 read pairs)<br>Junction sequence (201 reads; Supplementary Fig. 12E) |
|                            | Deletion of one copy of <i>CEN5</i>                                                                                                                                                                                                                                                             | Copy number (Supplementary Fig. 5a)<br>Discordant read pairs (353 read pairs)<br>Junction sequence (129 reads)                         |
|                            | Interstitial deletion (deleting one copy) on chr V R between <i>YERCTy1-1</i> and <i>YERCTy1-2</i>                                                                                                                                                                                              | Copy number (Supplementary Fig. 5a)                                                                                                    |
| ASYG296<br>( <i>mrc1</i> ) | Hairpin-mediated inverted duplication on chr V L (hairpin inside <i>PRB1</i> , 26-base loop)                                                                                                                                                                                                    | Copy number (Supplementary Fig. 5a)<br>Discordant read pairs (142 read pairs)<br>Junction sequence (132 reads; Supplementary Fig. 12E) |
|                            | Homology-mediated translocation between chr V L <i>YELCdelta4</i> and chr II L <i>YBLWdelta1</i>                                                                                                                                                                                                | Copy number (Supplementary Fig. 5a)<br>Discordant read pairs (59 read pairs)                                                           |
| ASYG297<br>( <i>mrc1</i> ) | Microhomology-containing translocation between chr V L (30,089 bp, inside <i>AVT2</i> ) and chr IV R (either <i>YDRWTy2-2</i> or <i>YDRCTy1-3</i> ); and chr V R ( <i>YERCTy1-1</i> ) with 13 bp identity at junctions; presence of other intermediate Ty elements in the junction is not known | Copy number (Supplementary Fig. 5c)<br>Junction sequence (23 reads; Supplementary Fig. 5c)                                             |
|                            | Homology-mediated translocation between chr IV R (either <i>YDRWTy2-2</i> or <i>YDRCTy1-3</i> ) and chr V R <i>YERCTy1-1</i> ; presence of other intermediate Ty elements in the junction is not known                                                                                          | Copy number (Supplementary Fig. 5c)                                                                                                    |
| ASYG298<br>( <i>mrc1</i> ) | First altered chromosome (contains chrV R and centromeric portion of chrV L): Microhomology-containing translocation between chr V L (26,042 bp) and chr IV R ( <i>YDRWTy1-5</i> )                                                                                                              | Copy number (Supplementary Fig. 5c)<br>Junction sequence (16 reads; Supplementary Fig. 5c)                                             |
|                            | Second altered chromosome (contains telomeric portion of chr VL): Homology-mediated translocation between telomeric end of chr V L and chr XIV R (using <i>DSF1-HXT13</i> region on chr V L and <i>YNR073C-HXT17</i> region on chr XIV R), with deletion of terminal region of chr XIV          | Copy number (Supplementary Fig. 5c)                                                                                                    |
| ASYG299<br>( <i>mrc1</i> ) | First altered chromosome (contains chrV R and centromeric portion of chrV L): Microhomology-containing translocation between chr V L (26,042 bp) and chr IV R ( <i>YDRWTy1-5</i> )                                                                                                              | Copy number (Supplementary Fig. 5c)<br>Junction sequence (5 reads; Supplementary Fig. 5c)                                              |
|                            | Second altered chromosome (contains telomeric portion of chr VL): Homology-mediated translocation between telomeric end of chr V L and chr XIV R (using <i>DSF1-HXT13</i> region on chr V                                                                                                       | Copy number (Supplementary Fig. 5c)                                                                                                    |

|                            |                                                                                                                                                      |                                                                                                                                          |
|----------------------------|------------------------------------------------------------------------------------------------------------------------------------------------------|------------------------------------------------------------------------------------------------------------------------------------------|
|                            | L and <i>YNR073C-HXT17</i> region on chr XIV R), with deletion of terminal region of chr XIV                                                         |                                                                                                                                          |
| ASYG300<br>( <i>mrc1</i> ) | Hairpin-mediated inverted duplication (hairpin within <i>NAT</i> at <i>can1::P<sub>1802</sub>-NAT</i> , 70-base loop)                                | Copy number (Supplementary Fig. 5a)<br>Junction sequence (44 reads;<br>Supplementary Fig. 12F)                                           |
|                            | Homology-mediated translocation between chr V L <i>PAU2</i> and subtelomeric <i>PAU</i> gene, most likely chrII L <i>PAU9</i>                        | Copy number (Supplementary Fig. 5a)                                                                                                      |
| ASYG301<br>( <i>mrc1</i> ) | Hairpin-mediated inverted duplication on chr V L (41-base loop)                                                                                      | Copy number (Supplementary Fig. 5a)<br>Junction sequence (4 reads; Supplementary Fig. 12F)                                               |
|                            | Homology-mediated translocation between chr V L <i>YELCdelta4</i> and chr IV R <i>YDRCTy1-2</i>                                                      | Copy number (Supplementary Fig. 5a)                                                                                                      |
| ASYG302<br>( <i>mrc1</i> ) | Hairpin-mediated inverted duplication on chr V L (hairpin inside <i>SIT1</i> , 31-base loop)                                                         | Copy number (Supplementary Fig. 5a)<br>Discordant read pairs (104 read pairs)<br>Junction sequence (94 reads;<br>Supplementary Fig. 12F) |
|                            | Homology-mediated translocation between chr V L <i>YELWdelta1/2</i> and chr V R “ <i>YERWdelta27</i> ”, an unannotated delta at chrV:449,322-449,631 | Copy number (Supplementary Fig. 5a)<br>Discordant read pairs (46 read pairs)                                                             |
| ASYG303<br>( <i>mrc1</i> ) | Microhomology-containing translocation between chr V L (41,897 bp, inside <i>PRB1</i> ) and chr IV R (1,257,951 bp, inside <i>YDR319C</i> )          | Copy number (Supplementary Fig. 5c)<br>Discordant read pairs (559 read pairs)<br>Junction sequence (79 reads;<br>Supplementary Fig. 5c)  |
| ASYG306<br>( <i>mrc1</i> ) | <i>de novo</i> telomere addition inside <i>NAT</i> (369 bp) at <i>can1::P<sub>1802</sub>-NAT</i>                                                     | Copy number (Supplementary Fig. 5c)<br>Junction sequence (24 read pairs)                                                                 |
| ASYG307<br>( <i>mrc1</i> ) | Hairpin-mediated inverted duplication on chr V L (hairpin inside <i>HHY1</i> , 13-base loop)                                                         | Copy number (Supplementary Fig. 5a)<br>Discordant read pairs (57 read pairs)<br>Junction sequence (65 reads;<br>Supplementary Fig. 12G)  |
|                            | Homology-mediated translocation between chr V L <i>YELCdelta4</i> and chr IV L <i>YDRCTy1-3</i>                                                      | Copy number (Supplementary Fig. 5a)                                                                                                      |
| ASYG477<br>( <i>mrc1</i> ) | Hairpin-mediated inverted duplication on chr V L (hairpin inside <i>NPR2</i> , 12-base loop)                                                         | Copy number (Supplementary Fig. 5b)<br>Discordant read pairs (51 read pairs)<br>Junction sequence (80 reads;<br>Supplementary Fig. 12H)  |
|                            | Homology-mediated translocation between chr V L <i>YELWdelta1</i> chr V R “ <i>YERWdelta27</i> ”, an unannotated delta at chrV:449,322-449,631       | Copy number (Supplementary Fig. 5b)<br>Discordant read pairs (41 read pairs)                                                             |
| ASYG478<br>( <i>mrc1</i> ) | Hairpin-mediated inverted duplication on chr V L (hairpin inside <i>PRB1</i> , 9-base loop)                                                          | Copy number (Supplementary Fig. 5b)<br>Discordant read pairs (39 read pairs)<br>Junction sequence (81 reads;<br>Supplementary Fig. 12I)  |
|                            | Homology-mediated translocation between chr V L <i>PAU2</i> and chr XII R <i>PAU4</i>                                                                | Copy number (Supplementary Fig. 5b)<br>Discordant read pairs (64 read pairs)                                                             |
| ASYG479<br>( <i>mrc1</i> ) | Hairpin-mediated inverted duplication on chr V L (hairpin from <i>PRB1-PCMI</i> ; 1,823-base loop)                                                   | Copy number (Supplementary Fig. 5b)<br>Discordant read pairs (579 read pairs)<br>Junction sequence (78 reads;<br>Supplementary Fig. 12I) |
|                            | Homology-mediated translocation between chr V L <i>YELCdelta4</i> and chr XII R <i>YLRCTy2-2</i>                                                     | Copy number (Supplementary Fig. 5b)                                                                                                      |
| ASYG480<br>( <i>mrc1</i> ) | Hairpin-mediated inverted duplication on chr V L (hairpin inside <i>HPA3</i> , 111-base loop)                                                        | Copy number (Supplementary Fig. 5b)<br>Discordant read pairs (143 read pairs)<br>Junction sequence (58 reads)                            |
|                            | Homology-mediated translocation between chr V L <i>YELCdelta4</i> and chr IV R <i>YDRCTy1-2</i> or <i>YDRWTy2-3</i>                                  | Copy number (Supplementary Fig. 5b)                                                                                                      |
|                            | Homology-mediated translocation between chr IV R <i>YDRWTy2-3</i> or <i>YDRCTy1-2</i> and chr V R <i>YERWdelta22</i>                                 | Copy number (Supplementary Fig. 5b)                                                                                                      |
| ASYG481<br>( <i>mrc1</i> ) | Hairpin-mediated inverted duplication on chr V L (hairpin inside <i>NAT</i> at <i>can1::P<sub>1802</sub>-NAT</i> , 163-base loop)                    | Copy number (Supplementary Fig. 5b)                                                                                                      |
|                            | Homology-mediated translocation between chr V L <i>YELCdelta4</i> and chr IV R <i>YDRCTy1-3</i>                                                      | Copy number (Supplementary Fig. 5b)                                                                                                      |
| ASYG482<br>( <i>mrc1</i> ) | Hairpin-mediated inverted duplication on chr V L (hairpin inside <i>NAT</i> at <i>can1::P<sub>1802</sub>-NAT</i> , 163-base loop)                    | Copy number (Supplementary Fig. 5b)<br>Discordant read pairs (11 read pairs)                                                             |

|                                 |                                                                                                                                                                                                            |                                                                                                                                          |
|---------------------------------|------------------------------------------------------------------------------------------------------------------------------------------------------------------------------------------------------------|------------------------------------------------------------------------------------------------------------------------------------------|
|                                 |                                                                                                                                                                                                            | Junction sequence (11 reads;<br>Supplementary Fig. 12I)                                                                                  |
|                                 | Homology-mediated translocation between chr V L <i>YELCdelta4</i> and chr IV R <i>YDRCTy1-3</i>                                                                                                            | Copy number (Supplementary Fig. 5b)                                                                                                      |
| ASYG483<br>( <i>mrc1</i> )      | Hairpin-mediated inverted duplication on chr V L (hairpin inside <i>NAT</i> at <i>can1::P<sub>ura</sub>-NAT</i> , 61-base loop)                                                                            | Copy number (Supplementary Fig. 5b)<br>Junction sequence (23 reads;<br>Supplementary Fig. 12J)                                           |
|                                 | Homology-mediated translocation between chr V L <i>YELCdelta4</i> and chr IV R <i>YDRCTy1-2</i>                                                                                                            | Copy number                                                                                                                              |
| ASYG319<br>( <i>mrc1 swr1</i> ) | Interstitial deletion on chr V L inside <i>ye1072w::CAN1-URA3</i> from 116,282 bp (inside <i>URA3</i> ) to 33,176 bp (inside <i>CAN1</i> ) with 12 bp microhomology                                        | Copy number (Supplementary Fig. 6a)<br>Discordant read pairs (323 read pairs)<br>Junction sequence (120 reads;<br>Supplementary Fig. 6a) |
| ASYG320<br>( <i>mrc1 swr1</i> ) | Interstitial deletion (23,321-35,586 bp) 6 bp microhomology                                                                                                                                                | Copy number (Supplementary Fig. 6a)<br>Discordant read pairs (216 read pairs)<br>Junction sequence (50 reads;<br>Supplementary Fig. 6a)  |
|                                 | Duplication on chr IV R (885,000 to 992,000 bp flanked by a pair of inverted Ty elements at each end)                                                                                                      | Copy number (data not shown)                                                                                                             |
| ASYG321<br>( <i>mrc1 swr1</i> ) | Microhomology-containing translocation between chr V L (34997, inside <i>NPR2</i> ) and chr XVI L (240,584 bp, inside <i>MLH3</i> )- 10 bp identity                                                        | Copy number (Supplementary Fig. 6b)<br>Discordant read pairs (418 read pairs)<br>Junction sequence (220 reads;<br>Supplementary Fig. 6b) |
|                                 | Microhomology-containing translocation inside <i>MLH3</i> between 240,627 and 240,577; 7 bp microhomology                                                                                                  | Copy number (Supplementary Fig. 6b)<br>Discordant read pairs (418 read pairs)<br>Junction sequence (220 reads;<br>Supplementary Fig. 6b) |
| ASYG322<br>( <i>mrc1 swr1</i> ) | Microhomology-containing translocation between chr V L (27,282 bp) and chr IV L (5,121 bp) or chr X R (740,680 bp), 13 bp imperfect homology (12/13 bp microhomology)                                      | Copy number (Supplementary Fig. 6b)<br>Junction sequence (49 reads;<br>Supplementary Fig. 6b)                                            |
| ASYG323<br>( <i>mrc1 swr1</i> ) | Microhomology-containing translocation between <i>NAT</i> at <i>can1::P<sub>ura</sub>-NAT</i> (nt 219) and chr XVI R (918,337 bp, inside <i>RPC82</i> ); 19 bp of imperfect homology (17/19 microhomology) | Copy number (Supplementary Fig. 6b)<br>Discordant read pairs (192 read pairs)<br>Junction sequence (20 reads;<br>Supplementary Fig. 6b)  |
| ASYG324<br>( <i>mrc1 swr1</i> ) | Microhomology-containing translocation between chr V L (inside <i>SIT1</i> , 29,425 bp) and chr XVI R (inside <i>ATG13</i> , 908,824 bp) with 12 bp of microhomology                                       | Copy number (Supplementary Fig. 6b)<br>Discordant read pairs (617 read pairs)<br>Junction sequence (109 reads;<br>Supplementary Fig. 6b) |
| ASYG325<br>( <i>mrc1 swr1</i> ) | Hairpin-mediated inverted duplication on chr V L (hairpin inside <i>CIN8</i> , 21-base loop)                                                                                                               | Copy number (Supplementary Fig. 6c)<br>Discordant read pairs (42 read pairs)<br>Junction sequence (52 reads;<br>Supplementary Fig. 12H)  |
|                                 | Homology-mediated translocation between chr V L <i>YELCdelta4</i> and chr XII R <i>YLRWTy1-3</i>                                                                                                           | Copy number (Supplementary Fig. 6c)<br>Discordant read pairs (43 read pairs)                                                             |
|                                 | Homology-mediated translocation between chr XII R <i>YLRWTy1-2</i> and chr III L <i>YCLWTy2-1</i>                                                                                                          | Copy number (Supplementary Fig. 6c)                                                                                                      |
| ASYG326<br>( <i>mrc1 swr1</i> ) | Microhomology-containing translocation between chr V L (inside <i>CIN8</i> , 36,729 bp) and chr II L (inside <i>YEL1</i> , 108,035 bp) with 6 bp microhomology                                             | Copy number (Supplementary Fig. 6b)<br>Discordant read pairs (427 read pairs)<br>Junction sequence (80 reads;<br>Supplementary Fig. 6b)  |
| ASYG327<br>( <i>mrc1 swr1</i> ) | Interstitial deletion inside <i>URA3</i> and across <i>CAN1</i> (in <i>ye1068c::CAN1-URA3</i> (116,693-25,841 bp) with 6 bp microhomology                                                                  | Copy number (Supplementary Fig. 6a)<br>Discordant read pairs (815 read pairs)<br>Junction sequence (112 reads;<br>Supplementary Fig. 6a) |
| ASYG328<br>( <i>mrc1 swr1</i> ) | Hairpin-mediated inverted duplication on chr V L (hairpin inside <i>NPR2</i> , 12-base loop)                                                                                                               | Copy number (Supplementary Fig. 6c)<br>Discordant read pairs (33 read pairs)<br>Junction sequence ( )                                    |
|                                 | Homology-mediated translocation between chr V L <i>YELWdelta1/2</i> and chr V R “ <i>YERWdelta27</i> ”, an unannotated delta at chrV:449,322-449,631                                                       | Copy number (Supplementary Fig. 6c)<br>Discordant read pairs (30 read pairs)                                                             |
| ASYG329<br>( <i>mrc1 swr1</i> ) | Microhomology-containing translocation between chr V L (37,543 bp, inside <i>CIN8</i> ) and chr X L (27,189 bp, inside <i>HXT8</i> ) with 10 bp microhomology                                              | Copy number (Supplementary Fig. 6a)<br>Discordant read pairs (604 read pairs)<br>Junction sequence (117 reads;                           |

|                                 |                                                                                                                                                                                                        |                                                                                                                                          |
|---------------------------------|--------------------------------------------------------------------------------------------------------------------------------------------------------------------------------------------------------|------------------------------------------------------------------------------------------------------------------------------------------|
|                                 |                                                                                                                                                                                                        | Supplementary Fig. 6a)                                                                                                                   |
| ASYG330<br>( <i>mrc1 swr1</i> ) | Interstitial deletion from 21,337 bp (inside <i>DSF1</i> ) to 40,003 bp with 16 bp imperfect microhomology (15/16 bp)                                                                                  | Copy number (Supplementary Fig. 6a)<br>Discordant read pairs (107 read pairs)<br>Junction sequence (42 reads;<br>Supplementary Fig. 6a)  |
| ASYG332<br>( <i>mrc1 swr1</i> ) | Microhomology-containing translocation between chr V L (38,625 bp, inside <i>CIN8</i> ) and chr I L (85,486 bp, <i>GIP4</i> ) with 7 bp microhomology                                                  | Copy number (Supplementary Fig. 6b)<br>Discordant read pairs (545 read pairs)<br>Junction sequence (103 reads;<br>Supplementary Fig. 6b) |
| ASYG333<br>( <i>mrc1 swr1</i> ) | Interstitial deletion within <i>yel072w::CAN1-URA3</i> ; 116,282 bp to 32,720 bp; 14 bp microhomology                                                                                                  | Copy number (Supplementary Fig. 6a)<br>Discordant read pairs (798 read pairs)<br>Junction sequence (171 reads;<br>Supplementary Fig. 6a) |
|                                 | Duplicated region within chrIV bounded by <i>YDRWTy1-4</i> and <i>YDRWTy1-5</i> , not obviously related to the GCR                                                                                     | Copy number (Data not shown)                                                                                                             |
| ASYG547<br>( <i>mrc1 swr1</i> ) | Interstitial deletion from 25,408 bp to 33,484 bp inside <i>yel072w::CAN1-URA3</i> , deletes <i>CAN1</i> promoter                                                                                      | Copy number (Supplementary Fig. 6a)<br>Discordant read pairs (601 read pairs)<br>Junction sequence (102 reads;<br>Supplementary Fig. 6a) |
| ASYG548<br>( <i>mrc1 swr1</i> ) | Interstitial deletion from 25,412 bp to 29,418 bp (inside <i>SIT1</i> ) across <i>yel072w::CAN1-URA3</i> with 3 bp microhomology                                                                       | Copy number (Supplementary Fig. 6a)<br>Discordant read pairs (510 read pairs)<br>Junction sequence (74 reads;<br>Supplementary Fig. 6a)  |
|                                 | Disomy of chr I, also observed in parental strain ASY1204                                                                                                                                              | Copy number histogram plot<br>(Supplementary Fig. 13)                                                                                    |
| ASYG549<br>( <i>mrc1 swr1</i> ) | Interstitial deletion from 116,699 bp to 33,406 bp inside <i>yel068c::CAN1-URA3</i> with 4 bp microhomology                                                                                            | Copy number (Supplementary Fig. 6a)<br>Discordant read pairs (439 read pairs)<br>Junction sequence (71 reads;<br>Supplementary Fig. 6a)  |
|                                 | Disomy of chr I, also observed in parental strain ASY1204                                                                                                                                              | Copy number histogram plot<br>(Supplementary Fig. 13)                                                                                    |
| ASYG550<br>( <i>mrc1 swr1</i> ) | <i>de novo</i> telomere addition on chr V L at 34,405 bp                                                                                                                                               | Copy number (Supplementary Fig. 6a)<br>Junction sequence (21 reads;<br>Supplementary Fig. 6a)                                            |
|                                 | Disomy of chr I, also observed in parental strain ASY1204                                                                                                                                              | Copy number histogram plot<br>(Supplementary Fig. 13)                                                                                    |
|                                 | Disomy of chr III                                                                                                                                                                                      | Copy number histogram plot<br>(Supplementary Fig. 13)                                                                                    |
| ASYG551<br>( <i>mrc1 swr1</i> ) | Microhomology-containing translocation between chr V L (37,903 bp, inside <i>CIN8</i> ) and chr IV L (27,031 bp, inside <i>ADY3</i> ) with 4 bp microhomology                                          | Copy number (Supplementary Fig. 6b)<br>Discordant read pairs (510 read pairs)<br>Junction sequence (103 reads;<br>Supplementary Fig. 6b) |
|                                 | Disomy of chr I, also observed in parental strain ASY1204                                                                                                                                              | Copy number histogram plot<br>(Supplementary Fig. 13)                                                                                    |
| ASYG554<br>( <i>mrc1 swr1</i> ) | Microhomology-containing translocation between chr V L (32,138 bp, inside <i>CAN1</i> at <i>yel072w::CAN1-URA3</i> ) and chr IX L (54,571 bp, inside <i>IMP2</i> ) with 14 bp imperfect microhomology  | Copy number (Supplementary Fig. 6b)<br>Discordant read pairs (622 read pairs)<br>Junction sequence (177 reads;<br>Supplementary Fig. 6b) |
|                                 | Non-reciprocal translocation between a telomeric fragment of chr V L and chr XIV R using the <i>DSF1-HXT13</i> and <i>YNR073C-HXT17</i> homology, with deletion of the telomeric fragment of chr XIV R | Copy number (Supplementary Fig. 6b)                                                                                                      |
|                                 | Disomy of chr I, also observed in parental strain ASY1204                                                                                                                                              | Copy number histogram plot<br>(Supplementary Fig. 13)                                                                                    |
| ASYG555<br>( <i>mrc1 swr1</i> ) | Interstitial deletion on chr V L from 23,168 bp to 41,480 bp; 7 bp microhomology                                                                                                                       | Copy number (Supplementary Fig. 6a)<br>Junction sequence (38 reads;<br>Supplementary Fig. 6a)                                            |
|                                 | Disomy of chr I, also observed in parental strain ASY1204                                                                                                                                              | Copy number histogram plot<br>(Supplementary Fig. 13)                                                                                    |

Evidence supporting GCR-related junctions can be derived from whole genome sequencing data in several ways. Frequently, multiple lines of evidence support many junctions. Copy number changes, from normalized read depth plots of uniquely mapping regions of the genome, can suggest possible

rearrangements, particularly those involving HR between repetitive elements. Discordant read pairs are read pairs where two uniquely mapping reads map to regions consistent with the GCR, but not with reference chromosome; note that the number of discordant read pairs is influenced by whether the rearrangement is within or adjacent to non-uniquely mapping regions of the genome. Junction sequences can be determined in two ways, depending on the junction. For junctions that generate a novel sequence, such as a deletion or hairpin-mediated inversion, the sequence can be derived from read pairs adjacent to junction-defining discordant read pairs in which one read does not map to the reference and potentially sequences the novel junction. In these cases, the numbers of reads that align to define the novel junction sequence are reported. For junctions mediated by homologies, such as tRNA genes or Ty-related sequences, sequences can be determined by aligning reads that are linked to uniquely mapping regions adjacent to the homologies involved in the junction.



**Supplementary Table 5. GCR structures for Can<sup>a</sup> 5FOA<sup>a</sup> isolates from the sGCR assay with sequenced genomes.**

| Sample (Relevant genotype) | GCR description                                                                                                                                                                         | GCR Junction Evidence                                                                                                               |
|----------------------------|-----------------------------------------------------------------------------------------------------------------------------------------------------------------------------------------|-------------------------------------------------------------------------------------------------------------------------------------|
| ASYG176 ( <i>swr1</i> )    | Hairpin-mediated inverted duplication on chr V L (hairpin between <i>NAT</i> at <i>can1::P<sub>LEU2</sub>-NAT</i> and <i>PRB1</i> at 40,999 bp (7,437 base loop)                        | Copy number (Supplementary Fig. 7a)<br>Discordant read pairs (14 read pairs)<br>Junction sequence (4 reads; Supplementary Fig. 12B) |
|                            | Homology-mediated translocation between chr V L <i>YELCdelta4</i> and chr XII R <i>YLRCTy2-2</i>                                                                                        | Copy number (Supplementary Fig. 7a)                                                                                                 |
| ASYG178 ( <i>swr1</i> )    | Homology-mediated inverted duplication on chr V L between <i>YCLWdelta5</i> at <i>can1::P<sub>LEU2</sub>-NAT</i> and <i>YELWdelta1/2</i>                                                | Copy number (Supplementary Fig. 7a)<br>Discordant read pairs (22 read pairs)                                                        |
|                            | <i>de novo</i> telomere addition on chr V L at 140,721 bp inside <i>YEL008W</i>                                                                                                         | Copy number (Supplementary Fig. 7a)<br>Junction sequence (2 reads; Supplementary Fig. 7a)                                           |
| ASYG179 ( <i>swr1</i> )    | <i>de novo</i> telomere addition on chr V L at 34,905 bp inside <i>NPR2</i>                                                                                                             | Copy number (Supplementary Fig. 7a)<br>Junction sequence (7 reads; Supplementary Fig. 7a)                                           |
| ASYG180 ( <i>swr1</i> )    | <i>de novo</i> telomere addition on chr V L at 38,542 bp inside <i>CIN8</i>                                                                                                             | Copy number (Supplementary Fig. 7a)<br>Junction sequence (3 reads; Supplementary Fig. 7a)                                           |
| ASYG261 ( <i>swr1</i> )    | Homology-mediated translocation between chr V L <i>YCLWdelta5</i> at <i>can1::P<sub>LEU2</sub>-NAT</i> and an unidentified Ty-containing target                                         | Copy number (Supplementary Fig. 7b)                                                                                                 |
|                            | Homology-mediated translocation between the unidentified Ty-containing target and chr VIII R <i>YHRCTy1-1</i>                                                                           | Copy number (Supplementary Fig. 7b)                                                                                                 |
| ASYG262 ( <i>swr1</i> )    | Homology-mediated inverted duplication on chr V L between <i>YCLWdelta5</i> at <i>can1::P<sub>LEU2</sub>-NAT</i> and <i>YELWdelta1/2</i>                                                | Copy number (Supplementary Fig. 7a)<br>Discordant read pairs (27 read pairs)                                                        |
|                            | Homology-mediated translocation between chr V L <i>YELCdelta4</i> and chr V R <i>YERCty1-1</i>                                                                                          | Copy number (Supplementary Fig. 7a)                                                                                                 |
| ASYG271 ( <i>swr1</i> )    | Homology-mediated translocation between chr V L <i>YCLWdelta5</i> at <i>can1::P<sub>LEU2</sub>-NAT</i> and chr XII L <i>YLLCdelta1</i>                                                  | Copy number (Supplementary Fig. 7b)<br>Discordant read pairs (12 read pairs)                                                        |
| ASYG272 ( <i>swr1</i> )    | <i>de novo</i> telomere addition on chr V L at 34,842 bp inside <i>NPR2</i>                                                                                                             | Copy number (Supplementary Fig. 7a)<br>Junction sequence (6 reads; Supplementary Fig. 7a)                                           |
| ASYG273 ( <i>swr1</i> )    | Homology-mediated inverted duplication on chr V L between <i>YCLWdelta5</i> at <i>can1::P<sub>LEU2</sub>-NAT</i> and <i>YELWdelta1/2</i>                                                | Copy number (Supplementary Fig. 7a)<br>Discordant read pairs (10 read pairs)                                                        |
|                            | Homology-mediated translocation between chr V L <i>YELCdelta4</i> and chr V R <i>YERCdelta16</i>                                                                                        | Copy number (Supplementary Fig. 7a)                                                                                                 |
| ASYG274 ( <i>swr1</i> )    | Homology-mediated translocation between chr V L <i>YCLWdelta5</i> at <i>can1::P<sub>LEU2</sub>-NAT</i> and chr V R “ <i>YERWdelta27</i> ”, an unannotated delta at chrV:449,322-449,631 | Copy number (Supplementary Fig. 7b)<br>Discordant read pairs (17 read pairs)                                                        |
| ASYG275 ( <i>swr1</i> )    | Homology-mediated inverted duplication on chr V L (mediated by pairing between <i>YCLWdelta5</i> at <i>can1::P<sub>LEU2</sub>-NAT</i> and <i>YELWdelta1/2</i> )                         | Copy number (Supplementary Fig. 7a)<br>Discordant read pairs (11 read pairs)                                                        |
|                            | Homology-mediated translocation between chr V L <i>PAU2</i> and another <i>PAU</i> gene, most likely chrII R <i>PAU24</i>                                                               | Copy number (Supplementary Fig. 7a)<br>Discordant read pairs (2 read pairs)                                                         |
| ASYG158 ( <i>mrc1</i> )    | Homology-mediated translocation between chr V L <i>YCLWdelta5</i> at <i>can1::P<sub>LEU2</sub>-NAT</i> and chr V R “ <i>YERWdelta27</i> ”, an unannotated delta at chrV:449,322-449,631 | Copy number (Supplementary Fig. 8a)<br>Discordant read pairs (201 read pairs)                                                       |
| ASYG159 ( <i>mrc1</i> )    | <i>de novo</i> telomere addition on chr V L (at 34,849 bp inside <i>NPR2</i> )                                                                                                          | Copy number (Supplementary Fig. 8b)<br>Junction sequence (25 reads;                                                                 |

|                                  |                                                                                                                                                                                               |                                                                                                                                         |
|----------------------------------|-----------------------------------------------------------------------------------------------------------------------------------------------------------------------------------------------|-----------------------------------------------------------------------------------------------------------------------------------------|
|                                  |                                                                                                                                                                                               | Supplementary Fig. 8b)                                                                                                                  |
|                                  | Disomy of chr II and chr IX                                                                                                                                                                   | Copy number histogram plot                                                                                                              |
| ASYG160<br>( <i>mrc1</i> )       | Homology-mediated translocation between chr V L<br><i>YCLWdelta5</i> at <i>can1::P<sub>LEU2</sub>-NAT</i> and chr X R<br><i>YJRWdelta17</i>                                                   | Copy number (Supplementary Fig. 8a)<br>Discordant read pairs (94 read pairs)                                                            |
| ASYG161<br>( <i>mrc1</i> )       | Homology-mediated translocation between chr V L<br><i>YCLWdelta5</i> at <i>can1::P<sub>LEU2</sub>-NAT</i> and chr V R<br>“ <i>YERWdelta27</i> ”, an unannotated delta at chrV:449,322-449,631 | Copy number (Supplementary Fig. 8a)<br>Discordant read pairs (167 read pairs)                                                           |
|                                  | Homology-mediated translocation between chr V R<br>“ <i>YERWdelta27</i> ” and chrIV R <i>YDRWTy2-3</i>                                                                                        | Copy number (Supplementary Fig. 8a)                                                                                                     |
|                                  | Non-integral aneuploidy of chr II and chr IX                                                                                                                                                  | Copy number histogram plot                                                                                                              |
| ASYG162<br>( <i>mrc1</i> )       | Homology-mediated translocation between chr V L<br><i>YCLWdelta5</i> at <i>can1::P<sub>LEU2</sub>-NAT</i> and chr IV R<br><i>YDRWTy2-2</i>                                                    | Copy number (Supplementary Fig. 8a)<br>Discordant read pairs (103 read pairs)                                                           |
|                                  | Non-integral aneuploidy of chr IX                                                                                                                                                             | Copy number histogram plot                                                                                                              |
| ASYG163<br>( <i>mrc1</i> )       | Homology-mediated translocation between chr V L<br><i>YCLWdelta5</i> at <i>can1::P<sub>LEU2</sub>-NAT</i> and chr V R<br>“ <i>YERWdelta27</i> ”, an unannotated delta at chrV:449,322-449,631 | Copy number (Fig. 8a)<br>Discordant read pairs (143 read pairs)                                                                         |
|                                  | Homology-mediated translocation between chr V R<br>“ <i>YERWdelta27</i> ” and an unidentified Ty-containing target                                                                            | -                                                                                                                                       |
|                                  | Homology-mediated translocation between an unidentified Ty-containing target and chr V R<br><i>YERCTy1-2</i>                                                                                  | Copy number (Fig. 8a)                                                                                                                   |
|                                  | Non-integral aneuploidy of chr IX                                                                                                                                                             | Copy number histogram plot                                                                                                              |
| ASYG164<br>( <i>mrc1</i> )       | Homology-mediated translocation between chr V L<br><i>YCLWdelta5</i> at <i>can1::P<sub>LEU2</sub>-NAT</i> and chr V R<br>“ <i>YERWdelta27</i> ”, an unannotated delta at chrV:449,322-449,631 | Copy number (Supplementary Fig. 8a)<br>Discordant read pairs (194 read pairs)                                                           |
| ASYG266<br>( <i>mrc1</i> )       | Homology-mediated translocation between chr V L<br><i>YCLWdelta5</i> at <i>can1::P<sub>LEU2</sub>-NAT</i> and chr III R<br><i>YCRWdelta13</i>                                                 | Copy number (Supplementary Fig. 8a)<br>Discordant read pairs (172 read pairs)                                                           |
|                                  | Disomy of chr IX disomy                                                                                                                                                                       | Copy number histogram plot                                                                                                              |
| ASYG267<br>( <i>mrc1</i> )       | <i>de novo</i> telomere addition on chr V L (at 30,823 bp inside <i>AVT2</i> )                                                                                                                | Copy number (Supplementary Fig. 8b)<br>Junction sequence (22 reads;<br>Supplementary Fig. 8b)                                           |
| ASYG268<br>( <i>mrc1</i> )       | Interstitial deletion on chr V L from 12,564 bp to 31,929 bp (inside <i>CAN1</i> at <i>yel068c::CAN1-URA3</i> ) with 7-bp microhomology                                                       | Copy number (Supplementary Fig. 8b)<br>Discordant read pairs (256 read pairs)<br>Junction sequence (53 reads;<br>Supplementary Fig. 8b) |
| ASYG269<br>( <i>mrc1</i> )       | Homology-mediated translocation between chr V L<br><i>YCLWdelta5</i> at <i>can1::P<sub>LEU2</sub>-NAT</i> and chr V R<br>“ <i>YERWdelta27</i> ”, an unannotated delta at chrV:449,322-449,631 | Copy number (Supplementary Fig. 8a)<br>Discordant read pairs (128 read pairs)                                                           |
| ASYG187<br>( <i>mrc1-1-843</i> ) | Homology-mediated translocation between chr V L<br><i>YCLWdelta5</i> at <i>can1::P<sub>LEU2</sub>-NAT</i> and chr V R<br>“ <i>YERWdelta27</i> ”, an unannotated delta at chrV:449,322-449,631 | Copy number (Supplementary Fig. 9a)<br>Discordant read pairs (203 read pairs)                                                           |
| ASYG188<br>( <i>mrc1-1-843</i> ) | <i>de novo</i> telomere addition on chr V L (at 34,841 bp inside <i>NPR2</i> )                                                                                                                | Copy number (Supplementary Fig. 9b)<br>Junction sequence (29 reads;<br>Supplementary Fig. 9b)                                           |

|                                  |                                                                                                                                                                                                 |                                                                                                                                           |
|----------------------------------|-------------------------------------------------------------------------------------------------------------------------------------------------------------------------------------------------|-------------------------------------------------------------------------------------------------------------------------------------------|
| ASYG189<br>( <i>mrc1-1-843</i> ) | Homology-mediated translocation between chr V L <i>YCLWdelta5</i> at <i>can1::P<sub>LEU2</sub>-NAT</i> and chr VII R <i>YGRWdelta28</i> in <i>YGRCTy2-2</i>                                     | Copy number (Supplementary Fig. 9a)<br>Discordant read pairs (60 read pairs)                                                              |
|                                  | Homology-mediated translocation between chr VII R <i>YGRWty2-2</i> and chrXII R <i>YLRCdelta21</i>                                                                                              | Copy number (Supplementary Fig. 9a)                                                                                                       |
|                                  | Homology-mediated translocation between chr XII R <i>YLRCTy2-2</i> and chr V R <i>YERCdelta20</i>                                                                                               | Copy number (Supplementary Fig. 9a)                                                                                                       |
| ASYG190<br>( <i>mrc1-1-843</i> ) | Homology-mediated translocation between chr V L <i>YCLWdelta5</i> at <i>can1::P<sub>LEU2</sub>-NAT</i> and chr XII R <i>YGRWty2-2</i>                                                           | Copy number (Supplementary Fig. 9a)                                                                                                       |
| ASYG191<br>( <i>mrc1-1-843</i> ) | Homology-mediated translocation between chr V L <i>YCLWdelta5</i> at <i>can1::P<sub>LEU2</sub>-NAT</i> and chr IV R <i>YDRWty2-3</i>                                                            | Copy number (Supplementary Fig. 9a)<br>Discordant read pairs (58 read pairs)                                                              |
| ASYG263<br>( <i>mrc1-1-843</i> ) | Homology-mediated translocation between chr V L <i>SUP53</i> at <i>can1::P<sub>LEU2</sub>-NAT</i> and chr XIII R <i>tL(CAA)M</i>                                                                | Copy number (Supplementary Fig. 9a)<br>Discordant read pairs (78 read pairs)                                                              |
| ASYG264<br>( <i>mrc1-1-843</i> ) | Homology-mediated translocation between chr V L <i>YCLWdelta5</i> at <i>can1::P<sub>LEU2</sub>-NAT</i> and chr IV R <i>YDRWty2-3</i>                                                            | Copy number (Supplementary Fig. 9a)<br>Discordant read pairs (38 read pairs)                                                              |
| ASYG276<br>( <i>mrc1-1-843</i> ) | Homology-mediated translocation between chr V L <i>YCLWdelta5</i> at <i>can1::P<sub>LEU2</sub>-NAT</i> and chr X R <i>YJRWdelta17</i>                                                           | Copy number (Supplementary Fig. 9a)<br>Discordant read pairs (134 read pairs)                                                             |
| ASYG277<br>( <i>mrc1-1-843</i> ) | <i>de novo</i> telomere addition on chr V L (at 36,339 bp)                                                                                                                                      | Copy number (Supplementary Fig. 9b)<br>Junction sequence (37 reads;<br>Supplementary Fig. 9b)                                             |
| ASYG278<br>( <i>mrc1-1-843</i> ) | Microhomology-containing translocation between chr V L (36,841 bp, inside <i>CIN8</i> ) and chr II R (557,876 bp, inside <i>AMNI</i> ) with 12 bp microhomology                                 | Copy number (Supplementary Fig. 9b)<br>Discordant read pairs (166 read pairs)<br>Junction sequence (21 reads;<br>Supplementary Fig. 9b)   |
| ASYG279<br>( <i>mrc1-1-843</i> ) | Homology-mediated translocation between chr V L <i>YCLWdelta5</i> at <i>can1::P<sub>LEU2</sub>-NAT</i> and chr X R <i>YJRWdelta17</i>                                                           | Copy number (Supplementary Fig. 9a)<br>Discordant read pairs (90 read pairs)                                                              |
| ASYG230<br>( <i>mrc1 swr1</i> )  | Hairpin-mediated inverted duplication on chr V L (hairpin inside <i>SITI</i> , 5-base loop, duplication until <i>YELWdelta1/2</i> )                                                             | Copy number (Supplementary Fig. 10a)<br>Discordant read pairs (54 read pairs)<br>Junction sequence (42 reads;<br>Supplementary Fig. 12D)  |
|                                  | Homology-mediated translocation between chr V L <i>YERWdelta1/2</i> and chr III R <i>YCRWdelta11</i>                                                                                            | Copy number (Supplementary Fig. 10a)                                                                                                      |
| ASYG231<br>( <i>mrc1 swr1</i> )  | Interstitial deletion on chr V L from 18,986 bp to 31,330 bp downstream of <i>CAN1</i> at <i>ye1068c::CAN1-URA3</i> with 8 bp microhomology                                                     | Copy number (Supplementary Fig. 10b)<br>Discordant read pairs (71 read pairs)<br>Junction sequence (10 reads;<br>Supplementary Fig. 10b)  |
| ASYG232<br>( <i>mrc1 swr1</i> )  | <i>de novo</i> telomere addition on chr V L at 31,669 bp at <i>ye1068c::CAN1-URA3</i>                                                                                                           | Copy number (Supplementary Fig. 10b)<br>Junction sequence (10 reads;<br>Supplementary Fig. 10b)                                           |
| ASYG233<br>( <i>mrc1 swr1</i> )  | Homology-mediated translocation between chr V L <i>YCLWdelta5</i> at <i>can1::P<sub>LEU2</sub>-NAT</i> and chr V R “ <i>YERWdelta27</i> ”, an unannotated delta at chrV:449,322-449,631         | Copy number (Supplementary Fig. 10a)<br>Discordant read pairs (101 read pairs)                                                            |
| ASYG234<br>( <i>mrc1 swr1</i> )  | Interstitial deletion on chr V L from 25,751 bp (inside <i>YEL068C</i> ) to 32,347 bp (inside <i>CAN1</i> at <i>ye1068c::CAN1-URA3</i> ) with 20 bp imperfect microhomology (17/20 bp identity) | Copy number (Supplementary Fig. 10b)<br>Discordant read pairs (415 read pairs)<br>Junction sequence (93 reads;<br>Supplementary Fig. 10b) |
| ASYG235<br>( <i>mrc1 swr1</i> )  | Homology-mediated translocation between chr V L <i>YCLWdelta5</i> at <i>can1::P<sub>LEU2</sub>-NAT</i> and chr IV R <i>YDRWty2-2</i>                                                            | Copy number (Supplementary Fig. 10a)<br>Discordant read pairs (216 read pairs)                                                            |
|                                  | Homology-mediated translocation between chr IV R <i>YDRCTy1-2</i> and chrVIII R <i>YHRCTy1-1</i>                                                                                                | Copy number (Supplementary Fig. 10a)                                                                                                      |
| ASYG236<br>( <i>mrc1 swr1</i> )  | Homology-mediated translocation between chr V L <i>YCLWdelta5</i> at <i>can1::P<sub>LEU2</sub>-NAT</i> and chr X L <i>YJLCdelta4/5</i>                                                          | Copy number (Supplementary Fig. 10a)<br>Discordant read pairs (127 read pairs)                                                            |

|                                       |                                                                                                                                                                                                 |                                                                                                                                           |
|---------------------------------------|-------------------------------------------------------------------------------------------------------------------------------------------------------------------------------------------------|-------------------------------------------------------------------------------------------------------------------------------------------|
| ASYG237<br>( <i>mrc1 swr1</i> )       | <i>de novo</i> telomere addition on chr V L at 28,339 bp (inside <i>SIT1</i> )                                                                                                                  | Copy number (Supplementary Fig. 10b)<br>Junction sequence (34 reads;<br>Supplementary Fig. 10b)                                           |
|                                       | Chromosome end-fusion between chr V L <i>de novo</i> telomere and chr VI R                                                                                                                      | Copy number (Supplementary Fig. 10b)<br>Discordant read pairs (109 read pairs)                                                            |
|                                       | Homology-mediated inverted duplication between chr VI R <i>SUP11</i> and chr VI R <i>SUP6</i>                                                                                                   | Copy number (Supplementary Fig. 10b)<br>Discordant read pairs (344 read pairs)                                                            |
| ASYG238<br>( <i>mrc1 swr1</i> )       | Homology-mediated translocation between chr V L <i>YCLWdelta5</i> at <i>can1::P<sub>LEU2</sub>-NAT</i> and chr IV R <i>YDRWTy2-3</i>                                                            | Copy number (Supplementary Fig. 10a)<br>Discordant read pairs (99 read pairs)                                                             |
| ASYG239<br>( <i>mrc1 swr1</i> )       | Homology-mediated translocation between chr V L <i>YCLWdelta5</i> at <i>can1::P<sub>LEU2</sub>-NAT</i> and chr V R “ <i>YERWdelta27</i> ”, an unannotated delta at chrV:449,322-449,631         | Copy number (Supplementary Fig. 10a)<br>Discordant read pairs (181 read pairs)                                                            |
| ASYG200<br>( <i>mrc1-1-843 swr1</i> ) | Hairpin-mediated inverted duplication on chr V L (hairpin inside <i>NAT</i> at <i>can1::P<sub>LEU2</sub>-NAT</i> , 243-base loop)                                                               | Copy number (Supplementary Fig. 11a)<br>Discordant read pairs (89 read pairs)<br>Junction sequence (26 reads;<br>Supplementary Fig. 12B)  |
|                                       | Homology-mediated translocation between chr V L <i>YELCdelta4</i> and chr IV R <i>YDRCTy1-3</i>                                                                                                 | Copy number (Supplementary Fig. 11a)                                                                                                      |
| ASYG201<br>( <i>mrc1-1-843 swr1</i> ) | Hairpin-mediated inverted duplication on chr V L (hairpin inside <i>NAT</i> at <i>can1::P<sub>LEU2</sub>-NAT</i> , 157-base loop)                                                               | Copy number (Supplementary Fig. 11a)<br>Discordant read pairs (11 read pairs)<br>Junction sequence (23 reads;<br>Supplementary Fig. 12B)  |
|                                       | Homology-mediated translocation between chr V L <i>YELCdelta4</i> and chr IV R <i>YDRCTy1-3</i>                                                                                                 | Copy number (Supplementary Fig. 11a)                                                                                                      |
| ASYG202<br>( <i>mrc1-1-843 swr1</i> ) | Interstitial deletion on chr V L from 19,129 bp to 27,085 bp (inside <i>HPA3</i> ) with 8 bp microhomology                                                                                      | Copy number (Supplementary Fig. 11b)<br>Discordant read pairs (561 read pairs)<br>Junction sequence (95 reads;<br>Supplementary Fig. 11b) |
| ASYG203<br>( <i>mrc1-1-843 swr1</i> ) | Hairpin-mediated inverted duplication on chr V L (hairpin inside <i>NPR2</i> )                                                                                                                  | Copy number (Supplementary Fig. 11a)<br>Discordant read pairs (104 read pairs)<br>Junction sequence (72 reads;<br>Supplementary Fig. 12A) |
|                                       | Homology-mediated translocation between chr V L <i>YELCdelta4</i> and chr I R <i>YARCTy1-1</i>                                                                                                  | Copy number (Supplementary Fig. 11a)<br>Discordant read pairs (33 read pairs)                                                             |
| ASYG204<br>( <i>mrc1-1-843 swr1</i> ) | Note: Isolate has 2n genomic copy with two chrV-derived GCRs; duplications on chr V L, chr IV R, and chr VII R are all 1.5x higher than the median 2n copy number.                              | -                                                                                                                                         |
|                                       | First GCR: Hairpin-mediated inverted duplication on chr V L (hairpin inside <i>NAT</i> )                                                                                                        | Copy number (Supplementary Fig. 11a)<br>Junction sequence (52 reads;<br>Supplementary Fig. 12C)                                           |
|                                       | First GCR: Homology-mediated translocation between <i>YELCdelta4</i> and chr IV R <i>YDRWTy2-3/YDRWTy1-3</i> or chrVII <i>YGRWTy2-2/YGRCTy1-3</i>                                               | Copy number (Supplementary Fig. 11a)                                                                                                      |
|                                       | Second GCR: Homology-mediated translocation between chr V L <i>YCLWdelta5</i> at <i>can1::P<sub>LEU2</sub>-NAT</i> and chr IV R <i>YDRWTy2-3/YDRWTy1-3</i> or chrVII <i>YGRWTy2-2/YGRCTy1-3</i> | Copy number (Supplementary Fig. 11a)                                                                                                      |
| ASYG205<br>( <i>mrc1-1-843 swr1</i> ) | Interstitial deletion on chr V L from 116,363 bp (inside <i>URA3</i> at <i>yel068c::CAN1-URA3</i> ) to 30,475 bp (inside <i>AVT2</i> ) with 14 bp microhomology                                 | Copy number (Supplementary Fig. 11b)<br>Discordant read pairs (626 read pairs)<br>Junction sequence (68 reads;<br>Supplementary Fig. 11b) |
| ASYG206<br>( <i>mrc1-1-843 swr1</i> ) | Homology-mediated translocation between chr V L <i>SUP53</i> at <i>can1::P<sub>LEU2</sub>-NAT</i> and chr XIII R <i>tL(CAA)M</i>                                                                | Copy number (Supplementary Fig. 11b)<br>Discordant read pairs (171 read pairs)                                                            |
| ASYG208<br>( <i>mrc1-1-843 swr1</i> ) | Homology-mediated translocation between chr V L <i>YCLWdelta5</i> at <i>can1::P<sub>LEU2</sub>-NAT</i> and chr IV R <i>YDRWTy2-3</i>                                                            | Copy number (Supplementary Fig. 11b)<br>Discordant read pairs (71 read pairs)                                                             |

|                                                 |                                                                                                                                                                                                                                                            |                                                                                                                                            |
|-------------------------------------------------|------------------------------------------------------------------------------------------------------------------------------------------------------------------------------------------------------------------------------------------------------------|--------------------------------------------------------------------------------------------------------------------------------------------|
|                                                 | Homology-mediated translocation between chr IV R <i>YDRWty2-3</i> and chr XV R <i>YORWty2-2</i>                                                                                                                                                            | Copy number (Supplementary Fig. 11b)                                                                                                       |
| ASYG209<br>( <i>mrc1-1-843</i><br><i>swr1</i> ) | Note: Isolate has 4 copies of the sequence between hairpin-mediated inverted duplication and <i>YELCdelta4</i> , 2 copies of the sequence between <i>YELCdelta4</i> and <i>YELWdelta6</i> , and two copies of the sequence telomeric to <i>YERCTy1-1</i> . | -                                                                                                                                          |
|                                                 | Hairpin-mediated inverted duplication on chr V L (hairpin inside <i>SIT1</i> , 45-base loop)                                                                                                                                                               | Copy number (Supplementary Fig. 11a)<br>Discordant read pairs (238 read pairs)<br>Junction sequence (165 reads;<br>Supplementary Fig. 12C) |
|                                                 | Homology-mediated inverted duplication on chr V L (mediated by pairing between <i>YELWdelta6</i> and <i>YELCdelta4</i> )                                                                                                                                   | Copy number (Supplementary Fig. 11a)<br>Discordant read pairs (19 read pairs)                                                              |
|                                                 | Hairpin-mediated inverted duplication on chr V L (hairpin inside <i>SIT1</i> , 45-base loop)                                                                                                                                                               | Copy number (Supplementary Fig. 11a)<br>Discordant read pairs (238 read pairs)<br>Junction sequence (165 reads;<br>Supplementary Fig. 12C) |
|                                                 | Homology-mediated translocation between chr V L <i>YELCdelta4</i> and chr V R <i>YERCTy1-1</i>                                                                                                                                                             | Copy number (Supplementary Fig. 11a)                                                                                                       |
| ASYG210<br>( <i>mrc1-1-843</i><br><i>swr1</i> ) | Hairpin-mediated inverted duplication on chr V L (hairpin inside <i>PRB1</i> , 7-base loop)                                                                                                                                                                | Copy number (Supplementary Fig. 11a)<br>Discordant read pairs (73 read pairs)<br>Junction sequence (85 reads;<br>Supplementary Fig. 12D)   |
|                                                 | Homology-mediated translocation between chr V L <i>YELCdelta4</i> and chr IV R <i>YDRCTy1-3</i>                                                                                                                                                            | Copy number (Supplementary Fig. 11a)                                                                                                       |

Evidence supporting GCR-related junctions can be derived from whole genome sequencing data in several ways. Frequently, multiple lines of evidence support many junctions. Copy number changes, from normalized read depth plots of uniquely mapping regions of the genome, can suggest possible rearrangements, particularly those involving HR between repetitive elements. Discordant read pairs are read pairs where two uniquely mapping reads map to regions consistent with the GCR, but not with reference chromosome; note that the number of discordant read pairs is influenced by whether the rearrangement is within or adjacent to non-uniquely mapping regions of the genome. Junction sequences can be determined in two ways, depending on the junction. For junctions that generate a novel sequence, such as a deletion or hairpin-mediated inversion, the sequence can be derived from read pairs adjacent to junction-defining discordant read pairs in which one read does not map to the reference and potentially sequences the novel junction. In these cases, the numbers of reads that align to define the novel junction sequence are reported. For junctions mediated by homologies, such as tRNA genes or Ty-related sequences, sequences can be determined by aligning reads that are linked to uniquely mapping regions adjacent to the homologies involved in the junction.

†Translocation observed by junction-defining read pairs for the translocation target with both ChrV L (adjacent to *P<sub>LEU2</sub>-YCLWdelta5* fragment, listed first) and ChrIII L (within the *P<sub>LEU2</sub>-YCLWdelta5* fragment, listed second).

**Supplementary Table 6. *S. cerevisiae* strains used in this study**

| Strain   | Genotype*                                                                                                                                                                                    | Reference  |
|----------|----------------------------------------------------------------------------------------------------------------------------------------------------------------------------------------------|------------|
| RDKY7629 | <i>MAT</i> alpha <i>hom3-10 ura3-Δ0 leu2-Δ0 trp1-Δ63 his3-Δ200 lyp1Δ::TRP1 cyh2-Q38K iYFR016c::P<sub>MFA1</sub>-LEU2 can1Δ::P<sub>LEU2(SUP53,YCLWdelta5)</sub>-natNT2</i>                    | Ref. 2     |
| RDKY8624 | <i>MAT</i> alpha <i>hom3-10 ura3-Δ0 leu2-Δ0 trp1-Δ63 his3-Δ200 lyp1Δ::TRP1 cyh2-Q38K iYFR016c::P<sub>MFA1</sub>-LEU2 can1Δ::P<sub>LEU2</sub>-natNT2</i>                                      | Ref. 2     |
| RDKY7635 | <i>MAT</i> alpha <i>hom3-10 ura3-Δ0 leu2-Δ0 trp1-Δ63 his3-Δ200 lyp1Δ::TRP1 cyh2-Q38K iYFR016c::P<sub>MFA1</sub>-LEU2 can1Δ::P<sub>LEU2(SUP53,YCLWdelta5)</sub>-natNT2 yel072w::CAN1-URA3</i> | Ref. 2     |
| RDKY7964 | <i>MAT</i> alpha <i>hom3-10 ura3-Δ0 leu2-Δ0 trp1-Δ63 his3-Δ200 lyp1Δ::TRP1 cyh2-Q38K iYFR016c::P<sub>MFA1</sub>-LEU2 can1Δ::P<sub>LEU2(SUP53,YCLWdelta5)</sub>-natNT2 yel068c::CAN1-URA3</i> | Ref. 2     |
| RDKY8625 | <i>MAT</i> alpha <i>hom3-10 ura3-Δ0 leu2-Δ0 trp1-Δ63 his3-Δ200 lyp1Δ::TRP1 cyh2-Q38K iYFR016c::P<sub>MFA1</sub>-LEU2 can1Δ::P<sub>LEU2</sub>-natNT2 yel068c::CAN1-URA3</i>                   | Ref. 2     |
| RDKY7785 | RDKY7635 <i>swr1Δ::HIS3</i>                                                                                                                                                                  | Ref. 2     |
| RDKY9077 | RDKY7964 <i>swr1Δ::HIS3</i>                                                                                                                                                                  | this study |
| RDKY8808 | RDKY8625 <i>swr1Δ::HIS3</i>                                                                                                                                                                  | this study |
| RDKY8969 | RDKY7635 <i>htz1Δ::HIS3</i>                                                                                                                                                                  | this study |
| RDKY9079 | RDKY7964 <i>htz1Δ::HIS3</i>                                                                                                                                                                  | this study |
| RDKY8810 | RDKY8625 <i>htz1Δ::HIS3</i>                                                                                                                                                                  | this study |
| RDKY8301 | RDKY7635 <i>mrc1Δ::kanMX4</i>                                                                                                                                                                | this study |
| RDKY9081 | RDKY7964 <i>mrc1Δ::kanMX4</i>                                                                                                                                                                | this study |
| RDKY8804 | RDKY8625 <i>mrc1Δ::kanMX4</i>                                                                                                                                                                | this study |
| RDKY8302 | RDKY7635 <i>mrc1Δ::kanMX4 swr1Δ::HIS3</i>                                                                                                                                                    | this study |
| RDKY9083 | RDKY7964 <i>mrc1Δ::kanMX4 swr1Δ::HIS3</i>                                                                                                                                                    | this study |
| RDKY9085 | RDKY8625 <i>mrc1Δ::kanMX4 swr1Δ::HIS3</i>                                                                                                                                                    | this study |
| RDKY8975 | RDKY7635 <i>mrc1Δ::kanMX4 htz1Δ::HIS3</i>                                                                                                                                                    | this study |
| RDKY9087 | RDKY8625 <i>mrc1Δ::kanMX4 htz1Δ::HIS3</i>                                                                                                                                                    | this study |
| RDKY9291 | RDKY7635 <i>vps71Δ::HIS3</i>                                                                                                                                                                 | this study |
| RDKY9293 | RDKY7635 <i>vps72Δ::HIS3</i>                                                                                                                                                                 | this study |
| RDKY9295 | RDKY7635 <i>swc3Δ::HIS3</i>                                                                                                                                                                  | this study |
| RDKY9297 | RDKY7635 <i>swc5Δ::HIS3</i>                                                                                                                                                                  | this study |
| RDKY9299 | RDKY7635 <i>arp6Δ::HIS3</i>                                                                                                                                                                  | this study |
| RDKY9301 | RDKY7635 <i>yaf9Δ::HIS3</i>                                                                                                                                                                  | this study |
| RDKY9303 | RDKY7635 <i>mrc1Δ::kanMX4 vps71Δ::HIS3</i>                                                                                                                                                   | this study |
| RDKY9305 | RDKY7635 <i>mrc1Δ::kanMX4 vps72Δ::HIS3</i>                                                                                                                                                   | this study |
| RDKY9307 | RDKY7635 <i>mrc1Δ::kanMX4 swc3Δ::HIS3</i>                                                                                                                                                    | this study |
| RDKY9309 | RDKY7635 <i>mrc1Δ::kanMX4 swc5Δ::HIS3</i>                                                                                                                                                    | this study |
| RDKY9311 | RDKY7635 <i>mrc1Δ::kanMX4 arp6Δ::HIS3</i>                                                                                                                                                    | this study |
| RDKY9313 | RDKY7635 <i>mrc1Δ::kanMX4 yaf9Δ::HIS3</i>                                                                                                                                                    | this study |
| RDKY8304 | RDKY7629 <i>mrc1-aq.kanMX4</i>                                                                                                                                                               | this study |
| RDKY8305 | RDKY7635 <i>mrc1-aq.kanMX4</i>                                                                                                                                                               | this study |

|          |                                               |            |
|----------|-----------------------------------------------|------------|
| RDKY9089 | RDKY7964 <i>mrc1-aq.kanMX4</i>                | this study |
| RDKY8818 | RDKY8624 <i>mrc1-aq.kanMX4</i>                | this study |
| RDKY9091 | RDKY8625 <i>mrc1-aq.kanMX4</i>                | this study |
| RDKY8306 | RDKY7635 <i>mrc1-aq.kanMX4 swr1Δ::HIS3</i>    | this study |
| RDKY9093 | RDKY7964 <i>mrc1-aq.kanMX4 swr1Δ::HIS3</i>    | this study |
| RDKY9095 | RDKY8625 <i>mrc1-aq.kanMX4 swr1Δ::HIS3</i>    | this study |
| RDKY9097 | RDKY7635 <i>mrc1-aq.kanMX4 htz1Δ::HIS3</i>    | this study |
| RDKY9099 | RDKY7964 <i>mrc1-aq.kanMX4 htz1Δ::HIS3</i>    | this study |
| RDKY9101 | RDKY8625 <i>mrc1-aq.kanMX4 htz1Δ::HIS3</i>    | this study |
| RDKY9315 | RDKY7635 <i>mrc1-aq.kanMX4 vps71Δ::HIS3</i>   | this study |
| RDKY9317 | RDKY7635 <i>mrc1-aq.kanMX4 vps72Δ::HIS3</i>   | this study |
| RDKY9319 | RDKY7635 <i>mrc1-aq.kanMX4 swc3Δ::HIS3</i>    | this study |
| RDKY9321 | RDKY7635 <i>mrc1-aq.kanMX4 swc5Δ::HIS3</i>    | this study |
| RDKY9323 | RDKY7635 <i>mrc1-aq.kanMX4 arp6Δ::HIS3</i>    | this study |
| RDKY9325 | RDKY7635 <i>mrc1-aq.kanMX4 yaf9Δ::HIS3</i>    | this study |
| RDKY8967 | RDKY7635 <i>mrc1-1-843.kanMX4</i>             | this study |
| RDKY9102 | RDKY7964 <i>mrc1-1-843.kanMX4</i>             | this study |
| RDKY8814 | RDKY8625 <i>mrc1-1-843.kanMX4</i>             | this study |
| RDKY8973 | RDKY7635 <i>mrc1-1-843.kanMX4 swr1Δ::HIS3</i> | this study |
| RDKY9104 | RDKY7964 <i>mrc1-1-843.kanMX4 swr1Δ::HIS3</i> | this study |
| RDKY9106 | RDKY8625 <i>mrc1-1-843.kanMX4 swr1Δ::HIS3</i> | this study |
| RDKY9108 | RDKY7635 <i>mrc1-1-843.kanMX4 htz1Δ::HIS3</i> | this study |
| RDKY9110 | RDKY7964 <i>mrc1-1-843.kanMX4 htz1Δ::HIS3</i> | this study |
| RDKY9112 | RDKY8625 <i>mrc1-1-843.kanMX4 htz1Δ::HIS3</i> | this study |
| RDKY8963 | RDKY7635 <i>tof1Δ::kanMX4</i>                 | this study |
| RDKY9114 | RDKY7964 <i>tof1Δ::kanMX4</i>                 | this study |
| RDKY8816 | RDKY8625 <i>tof1Δ::kanMX4</i>                 | this study |
| RDKY8971 | RDKY7635 <i>tof1Δ::kanMX4 swr1Δ::HIS3</i>     | this study |
| RDKY9115 | RDKY7964 <i>tof1Δ::kanMX4 swr1Δ::HIS3</i>     | this study |
| RDKY9117 | RDKY8625 <i>tof1Δ::kanMX4 swr1Δ::HIS3</i>     | this study |
| RDKY9119 | RDKY7635 <i>tof1Δ::kanMX4 htz1Δ::HIS3</i>     | this study |
| RDKY9121 | RDKY8625 <i>tof1Δ::kanMX4 htz1Δ::HIS3</i>     | this study |
| RDKY8965 | RDKY7635 <i>csn3Δ::kanMX4</i>                 | this study |
| RDKY9128 | RDKY7964 <i>csn3Δ::kanMX4</i>                 | this study |
| RDKY8806 | RDKY8625 <i>csn3Δ::kanMX4</i>                 | this study |
| RDKY8972 | RDKY7635 <i>csn3Δ::kanMX4 swr1Δ::HIS3</i>     | this study |
| RDKY9165 | RDKY7635 <i>csn3Δ::hphNT1 swr1Δ::HIS3</i>     | this study |
| RDKY9130 | RDKY7964 <i>csn3Δ::kanMX4 swr1Δ::HIS3</i>     | this study |
| RDKY9132 | RDKY8625 <i>csn3Δ::kanMX4 swr1Δ::HIS3</i>     | this study |
| RDKY9134 | RDKY7635 <i>csn3Δ::kanMX4 htz1Δ::HIS3</i>     | this study |
| RDKY9136 | RDKY8625 <i>csn3Δ::kanMX4 htz1Δ::HIS3</i>     | this study |

|         |                                                              |            |
|---------|--------------------------------------------------------------|------------|
| RDY9138 | RDY7635 <i>swr1Δ::HIS3 htz1Δ::hphNT1</i>                     | this study |
| RDY9140 | RDY7635 <i>mrc1Δ::kanMX4 swr1Δ::HIS3 htz1Δ::hphNT1</i>       | this study |
| RDY9141 | RDY7635 <i>mrc1Δ::kanMX4 tof1Δ::hphNT1</i>                   | this study |
| RDY9143 | RDY7635 <i>mrc1Δ::kanMX4 swr1Δ::HIS3 tof1Δ::hphNT1</i>       | this study |
| RDY9145 | RDY7635 <i>mrc1-aq.kanMX4 tof1Δ::hphNT1</i>                  | this study |
| RDY9147 | RDY7635 <i>mrc1-aq.kanMX4 swr1Δ::HIS3 tof1Δ::hphNT1</i>      | this study |
| RDY9150 | RDY7635 <i>mrc1-1-843.kanMX4 tof1Δ::hphNT1</i>               | this study |
| RDY9152 | RDY7635 <i>mrc1-1-843.kanMX4 swr1Δ::HIS3 tof1Δ::hphNT1</i>   | this study |
| RDY9154 | RDY7635 <i>mrc1::kanMX4 csm3Δ::hphNT1</i>                    | this study |
| RDY9156 | RDY7635 <i>mrc1Δ::kanMX4 swr1Δ::HIS3 csm3Δ::hphNT1</i>       | this study |
| RDY9158 | RDY7635 <i>mrc1-aq.kanMX4 csm3Δ::hphNT1</i>                  | this study |
| RDY9160 | RDY7635 <i>mrc1-aq.kanMX4 swr1Δ::HIS3 csm3Δ::hphNT1</i>      | this study |
| RDY9163 | RDY7635 <i>mrc1-1-843.kanMX4 csm3Δ::hphNT1</i>               | this study |
| RDY9166 | RDY7635 <i>mrc1-1-843.kanMX4 swr1Δ::HIS3 csm3Δ::hphNT1</i>   | this study |
| RDY9167 | RDY7635 <i>HTZ1.HIS3</i>                                     | this study |
| RDY9169 | RDY7635 <i>htz1-K126R,K133R.HIS3</i>                         | this study |
| RDY9171 | RDY7635 <i>mrc1Δ::kanMX4 htz1-K126R,K133R.HIS3</i>           | this study |
| RDY9173 | RDY7635 <i>tof1Δ::kanMX4 htz1-K126R,K133R.HIS3</i>           | this study |
| RDY9174 | RDY7635 <i>csm3Δ::kanMX4 htz1-K126R,K133R.HIS3</i>           | this study |
| RDY9248 | RDY7635 <i>htz1-K(4,9,11,15)R.HIS3</i>                       | this study |
| RDY9256 | RDY7635 <i>mrc1Δ::kanMX4 htz1-K(4,9,11,15)R.HIS3</i>         | this study |
| RDY9251 | RDY7635 <i>htz1-K(4,9,11,15)Q.HIS3</i>                       | this study |
| RDY9258 | RDY7635 <i>mrc1Δ::kanMX4 htz1-K(4,9,11,15)Q.HIS3</i>         | this study |
| RDY9260 | RDY7635 <i>htz1-K(4,9,11,15,126,133)R.HIS3</i>               | this study |
| RDY9263 | RDY7635 <i>mrc1Δ::kanMX4 htz1-K(4,9,11,15,126,133)R.HIS3</i> | this study |
| RDY9265 | RDY7635 <i>htz1-1-114.HIS3</i>                               | this study |
| RDY9269 | RDY7635 <i>mrc1Δ::kanMX4 htz1-1-114.HIS3</i>                 | this study |
| RDY9267 | RDY7635 <i>htz1-1-120.HIS3</i>                               | this study |
| RDY9271 | RDY7635 <i>mrc1Δ::kanMX4 htz1-1-120.HIS3</i>                 | this study |
| RDY9176 | RDY8625 <i>rad52Δ::hphNT1</i>                                | this study |
| RDY9178 | RDY8625 <i>mrc1Δ::kanMX4 rad52Δ::hphNT1</i>                  | this study |
| RDY9180 | RDY8625 <i>swr1Δ::HIS3 rad52Δ::hphNT1</i>                    | this study |
| RDY9182 | RDY8625 <i>mrc1Δ::kanMX4 swr1Δ::HIS3 rad52Δ::hphNT1</i>      | this study |
| RDY9184 | RDY8625 <i>ino80Δ::hphNT1</i>                                | this study |
| RDY9186 | RDY8625 <i>mrc1Δ::kanMX4 ino80Δ::hphNT1</i>                  | this study |
| RDY9188 | RDY8625 <i>swr1Δ::HIS3 ino80Δ::hphNT1</i>                    | this study |
| RDY9190 | RDY8625 <i>mrc1Δ::kanMX4 swr1Δ::HIS3 ino80Δ::hphNT1</i>      | this study |
| RDY9273 | RDY8625 <i>htz1Δ::HIS3 ino80Δ::hphNT1</i>                    | this study |
| RDY9275 | RDY8625 <i>mrc1Δ::kanMX4 htz1Δ::HIS3 ino80Δ::hphNT1</i>      | this study |
| RDY8977 | RDY7635 <i>DDC2-EGFP.hphNT1</i>                              | this study |
| RDY8978 | RDY7635 <i>mrc1Δ::kanMX4 DDC2-EGFP.hphNT1</i>                | this study |



|                                    |                                                                                                                   |            |
|------------------------------------|-------------------------------------------------------------------------------------------------------------------|------------|
| RDKY8979                           | RDKY7635 <i>swr1Δ::HIS3 DDC2-EGFP.hphNT1</i>                                                                      | this study |
| RDKY8980                           | RDKY7635 <i>mrc1Δ::kanMX4 swr1Δ::HIS3 DDC2-EGFP.hphNT1</i>                                                        | this study |
| RDKY8983                           | RDKY7635 <i>mrc1-1-843.kanMX4 DDC2-EGFP.hphNT1</i>                                                                | this study |
| RDKY8987                           | RDKY7635 <i>mrc1-1-843.kanMX4 swr1Δ::HIS3 DDC2-EGFP.hphNT1</i>                                                    | this study |
| RDKY9277                           | RDKY7635 <i>mrc1-aq.kanMX4 DDC2-EGFP.hphNT1</i>                                                                   | this study |
| RDKY9279                           | RDKY7635 <i>mrc1-aq.kanMX4 swr1Δ::HIS3 DDC2-EGFP.hphNT1</i>                                                       | this study |
| RDKY8981                           | RDKY7635 <i>tof1Δ::kanMX4 DDC2-EGFP.hphNT1</i>                                                                    | this study |
| RDKY8985                           | RDKY7635 <i>tof1Δ::kanMX4 swr1Δ::HIS3 DDC2-EGFP.hphNT1</i>                                                        | this study |
| RDKY8982                           | RDKY7635 <i>csn3Δ::kanMX4 DDC2-EGFP.hphNT1</i>                                                                    | this study |
| RDKY8986                           | RDKY7635 <i>csn3Δ::kanMX4 swr1Δ::HIS3 DDC2-EGFP.hphNT1</i>                                                        | this study |
| RDKY8984                           | RDKY7635 <i>htz1Δ::HIS3 DDC2-EGFP.hphNT1</i>                                                                      | this study |
| RDKY8988                           | RDKY7635 <i>mrc1Δ::kanMX4 htz1Δ::HIS3 DDC2-EGFP.hphNT1</i>                                                        | this study |
| RDKY8989                           | RDKY7635 <i>HUG1-EGFP.hphNT1</i>                                                                                  | this study |
| RDKY8991                           | RDKY7635 <i>mrc1Δ::kanMX4 HUG1-EGFP.hphNT1</i>                                                                    | this study |
| RDKY8993                           | RDKY7635 <i>swr1Δ::HIS3 HUG1-EGFP.hphNT1</i>                                                                      | this study |
| RDKY8995                           | RDKY7635 <i>mrc1Δ::kanMX4 swr1Δ::HIS3 HUG1-EGFP.hphNT1</i>                                                        | this study |
| RDKY8997                           | RDKY7635 <i>tof1Δ::kanMX4 HUG1-EGFP.hphNT1</i>                                                                    | this study |
| RDKY8999                           | RDKY7635 <i>csn3Δ::kanMX4 HUG1-EGFP.hphNT1</i>                                                                    | this study |
| RDKY9394                           | RDKY7635 <i>mrc1-1-843.kanMX4 HUG1-EGFP.hphNT1</i>                                                                | this study |
| RDKY9003                           | RDKY7635 <i>htz1Δ::HIS3 HUG1-EGFP.hphNT1</i>                                                                      | this study |
| RDKY9005                           | RDKY7635 <i>tof1Δ::kanMX4 swr1Δ::HIS3 HUG1-EGFP.hphNT1</i>                                                        | this study |
| RDKY9007                           | RDKY7635 <i>csn3Δ::kanMX4 swr1Δ::HIS3 HUG1-EGFP.hphNT1</i>                                                        | this study |
| RDKY9009                           | RDKY7635 <i>mrc1-1-843.kanMX4 swr1Δ::HIS3 HUG1-EGFP.hphNT1</i>                                                    | this study |
| RDKY9011                           | RDKY7635 <i>mrc1Δ::kanMX4 htz1Δ::HIS3 HUG1-EGFP.hphNT1</i>                                                        | this study |
| RDKY9281                           | RDKY7635 <i>mrc1-aq.kanMX4 HUG1-EGFP.hphNT1</i>                                                                   | this study |
| RDKY9283                           | RDKY7635 <i>mrc1-aq.kanMX4 swr1Δ::HIS3 HUG1-EGFP.hphNT1</i>                                                       | this study |
| BY4741                             | <i>MATa his3-Δ1 leu2-Δ0 met15-Δ0 ura3-Δ0</i>                                                                      | Ref. 3     |
| RDKY9285                           | BY4741 <i>mrc1-1-843.kanMX4</i>                                                                                   | this study |
| RDKY9286,<br>RDKY9287              | RDKY7635 <i>mrc1-1-843.kanMX4 rad9Δ::HIS3</i>                                                                     | this study |
| RDKY9288,<br>RDKY9289,<br>RDKY9290 | RDKY7964 <i>mrc1-1-843.kanMX4 rad9Δ::HIS3</i>                                                                     | this study |
| FY1296                             | W303 <i>MATa ade2-1 trp1-1 leu2-3,112 his3-11,15 ura3 can1-100 RAD5<sup>+</sup></i>                               | Ref. 4     |
| HY3777                             | W303 <i>MATa ade2-1 trp1-1 leu2-3,112 his3-11,15 ura3 can1-100 RAD5<sup>+</sup><br/>mrc1Δ::HIS5</i>               | this study |
| RDKY8798                           | W303 <i>MATa ade2-1 trp1-1 leu2-3,112 his3-11,15 ura3 can1-100 RAD5<sup>+</sup><br/>swr1Δ::kanMX4</i>             | this study |
| RDKY8800                           | W303 <i>MATa ade2-1 trp1-1 leu2-3,112 his3-11,15 ura3 can1-100 RAD5<sup>+</sup><br/>htz1Δ::kanMX4</i>             | this study |
| RDKY8801                           | W303 <i>MATa ade2-1 trp1-1 leu2-3,112 his3-11,15 ura3 can1-100 RAD5<sup>+</sup><br/>mrc1Δ::HIS5 swr1Δ::kanMX4</i> | this study |
| RDKY8802                           | W303 <i>MATa ade2-1 trp1-1 leu2-3,112 his3-11,15 ura3 can1-100 RAD5<sup>+</sup><br/>tof1Δ::HIS5</i>               | this study |

|          |                                                                                                               |            |
|----------|---------------------------------------------------------------------------------------------------------------|------------|
| RDKY8820 | W303 <i>MATa ade2-1 trp1-1 leu2-3,112 his3-11,15 ura3 can1-100 RAD5<sup>+</sup> mrc1Δ::HIS5 htz1Δ::kanMX4</i> | this study |
| RDKY8822 | W303 <i>MATa ade2-1 trp1-1 leu2-3,112 his3-11,15 ura3 can1-100 RAD5<sup>+</sup> tof1Δ::HIS5 swr1Δ::kanMX4</i> | this study |
| RDKY8824 | W303 <i>MATa ade2-1 trp1-1 leu2-3,112 his3-11,15 ura3 can1-100 RAD5<sup>+</sup> tof1Δ::HIS5 htz1Δ::kanMX4</i> | this study |

\* Strains are isogenic to S288c unless otherwise indicated

**Supplementary Table 7. Primers used in this study**

| Name   | Sequence (5'-3')                                                                  | Purpose                                                              |
|--------|-----------------------------------------------------------------------------------|----------------------------------------------------------------------|
| oAS145 | TTCTAACTGCTCTTTGCATTTTCCAAGTTATTGCATTACA<br>AGAATATATGgagcagattgtactgagagtgcacc   | Amplify <i>HIS3</i> from <i>pRS303</i> to delete <i>SWR1</i>         |
| oAS146 | TCCGATTTGGACAACCTAAGGCAGCGGTGAAGAGTAGAA<br>CCTGGTCCTTCActccttacgcatctgtgcggtatttc |                                                                      |
| oAS659 | TTCTAACTGCTCTTTGCATTTTCCAAGTTATTGCATTACA<br>AGAATATATGcgtacgctgcaggtcgac          | Amplify <i>kanMX4</i> from <i>pFA6a-kanMX4</i> to delete <i>SWR1</i> |
| oAS660 | TCCGATTTGGACAACCTAAGGCAGCGGTGAAGAGTAGAA<br>CCTGGTCCTTCAatcgatgaattcgagctcgt       |                                                                      |
| oAS147 | CCAAAGCATTTCGATTACTGC                                                             | Verify <i>swr1Δ</i>                                                  |
| oAS148 | GGCGATAGTGTGTGTCGGAAA                                                             |                                                                      |
| oAS323 | AGGAAGTTCGTTATTTCGCTTTTGAACCTATCACCAAATA<br>TTTTAGTGATGcgtacgctgcaggtcgac         | Amplify <i>kanMX4</i> from <i>pFA6a-kanMX4</i> to delete <i>MRC1</i> |
| oAS324 | ACAGCTTCTGGAGTTCAATCAACTTCTTCGGAAAAGAT<br>AAAAAACCCTAatcgatgaattcgagctcgt         |                                                                      |
| oAS325 | GCTCCGGAAGAAGAAGCA                                                                | Verify <i>mrc1Δ</i>                                                  |
| oAS326 | GGGAGAAAGAATAAGGGCA                                                               |                                                                      |
| oAS329 | CTAGCTTGTGGGGTTTLAGTGTATCTTTAATATAGGAGGG<br>CGCACACTATGcgtacgctgcaggtcgac         | Amplify <i>kanMX4</i> from <i>pFA6a-kanMX4</i> to delete <i>TOF1</i> |
| oAS330 | TTCTAAAATTACACGTATTAAGGGATTAATTACTACAT<br>ATTCATTCTCAatcgatgaattcgagctcgt         |                                                                      |
| oAS500 | CTAGCTTGTGGGGTTTLAGTGTATCTTTAATATAGGAGGG<br>CGCACACTATGcgtacgctgcaggtcgac         | Amplify <i>hphNT1</i> from <i>pFA6a-hphNT1</i> to delete <i>TOF1</i> |
| oAS501 | TTCTAAAATTACACGTATTAAGGGATTAATTACTACAT<br>ATTCATTCTCAatcgatgaattcgagctcgt         |                                                                      |
| oAS331 | GAATTGCTTCCCTGTGGAAA                                                              | Verify <i>tof1Δ</i>                                                  |
| oAS332 | TGATAAAGAATGAATCGCATGT                                                            |                                                                      |
| oAS356 | TGGATTAATAATGCCATGAAAACGTGAACAGAAACTTTT<br>ATTGAGGTCATGcgtacgctgcaggtcgac         | Amplify <i>kanMX4</i> from <i>pFA6a-kanMX4</i> to delete <i>CSM3</i> |
| oAS357 | TATAGATGCCACACGCACGTTTGGATTATTACCTTCAA<br>TGACATTGCTAatcgatgaattcgagctcgt         |                                                                      |
| oAS502 | TGGATTAATAATGCCATGAAAACGTGAACAGAAACTTTT<br>ATTGAGGTCATGcgtacgctgcaggtcgac         | Amplify <i>hphNT1</i> from <i>pFA6a-hphNT1</i> to delete <i>CSM3</i> |
| oAS503 | TATAGATGCCACACGCACGTTTGGATTATTACCTTCAA<br>TGACATTGCTAatcgatgaattcgagctcgt         |                                                                      |
| oAS358 | AAGGAAAAATGCCGGGTAAT                                                              | Verify <i>csm3Δ</i>                                                  |
| oAS359 | TCGAACCAGGCTCTTTCTACA                                                             |                                                                      |
| oAS362 | TTGATAGATCGAAGAAAAAGAACGGATCGCTTACTCAT<br>AACAGCGAAATGgagcagattgtactgagagtgcacc   | Amplify <i>HIS3</i> from <i>pRS303</i> to delete <i>VPS71</i>        |
| oAS363 | TATAAATAGGGGAGAAAAAAGGGCTTACGAATACATAC<br>TGATCATTACTActccttacgcatctgtgcggtatttc  |                                                                      |
| oAS364 | TGAACATGATGATCTTTGTGAGT                                                           | Verify <i>vps71Δ</i>                                                 |
| oAS365 | CCTTGAAAAATGAGAATAAACGA                                                           |                                                                      |
| oAS366 | TAATGAATACAAATAGAAGTGAAACCGAAGCAAATTCA<br>CAGTGCACGATGgagcagattgtactgagagtgcacc   | Amplify <i>HIS3</i> from <i>pRS303</i> to delete <i>VPS72</i>        |
| oAS367 | AATATAGTCAAATGTTTAAACGACCTACCATTATATAGTC<br>TGTCTCAATTActccttacgcatctgtgcggtatttc |                                                                      |

|        |                                                                                   |                                                                                        |
|--------|-----------------------------------------------------------------------------------|----------------------------------------------------------------------------------------|
| oAS368 | CAGTAAGCAGAAAGCACCATGT                                                            | Verify <i>vps72Δ</i>                                                                   |
| oAS369 | CCAGAAATTGATGAATGTAACGA                                                           |                                                                                        |
| oAS370 | GCATATGCATGCGATTTGGAAGTAACGCTCGCCGTAGA<br>CAAGTAAGAATGgagcagattgtactgagagtgcacc   | Amplify <i>HIS3</i> from <i>pRS303</i> to delete <i>SWC3</i>                           |
| oAS371 | GTGTATAATCATAATGGCGTTAAAGCAGAATAAAGTAA<br>CCGAACACCTTActccttacgcatctgtcgggtatttc  |                                                                                        |
| oAS372 | CTGTGCTCAATCAATCGTGTT                                                             | Verify <i>swc3Δ</i>                                                                    |
| oAS373 | CGGCAAAGTTTGGCATAACA                                                              |                                                                                        |
| oAS374 | AAACTGGAATAATATTGTTTCAAGAAAGAAAACCCACT<br>AGCCTATAAATGgagcagattgtactgagagtgcacc   | Amplify <i>HIS3</i> from <i>pRS303</i> to delete <i>SWC5</i>                           |
| oAS375 | AAAAATTTGAGCAGAAAAGCATGTTATTTAATACATGT<br>AATATTTGTCTActccttacgcatctgtcgggtatttc  |                                                                                        |
| oAS376 | CCATATCGGGGAAAGACAAA                                                              | Verify <i>swc5Δ</i>                                                                    |
| oAS377 | CACACCCATACACCCCATTA                                                              |                                                                                        |
| oAS378 | GACCAAAGGAGAAGAAGCGCAGAATCGTGGACAAGAT<br>AATTTAAACTATGgagcagattgtactgagagtgcacc   | Amplify <i>HIS3</i> from <i>pRS303</i> to delete <i>ARP6</i>                           |
| oAS379 | TCTCGACTTTTCGGATTTTCATTGTTGCTATGTAAATCTA<br>TAGTTAATTAActccttacgcatctgtcgggtatttc |                                                                                        |
| oAS380 | CTTCCGTCCATAATTACAAATG                                                            | Verify <i>arp6Δ</i>                                                                    |
| oAS381 | TTTGGGAATTTGTCAATAAAAATGT                                                         |                                                                                        |
| oAS382 | ATACATTACTTGTGACCACCTATTTACGGCATCACAAAG<br>AAAGCGAGATGgagcagattgtactgagagtgcacc   | Amplify <i>HIS3</i> from <i>pRS303</i> to delete <i>YAF9</i>                           |
| oAS383 | ATTACTATGGCTGTTATGAAAATACCGTTGTTCCGGGTG<br>CAGTGATCCTActccttacgcatctgtcgggtatttc  |                                                                                        |
| oAS384 | ATGACGTGATGACGCTTCG                                                               | Verify <i>yaf9Δ</i>                                                                    |
| oAS385 | TATGACTCTGCACACATTTTCG                                                            |                                                                                        |
| oAS386 | TAAATTC AATTTTCGCACTATAGCCGCACGTAAAAATAA<br>CTTAACATAATGgagcagattgtactgagagtgcacc | Amplify <i>HIS3</i> from <i>pRS303</i> to delete <i>HTZ1</i>                           |
| oAS387 | CAGGAGCAGGGAGAATTACGGGAAATGGGAAAGAAAA<br>ACTATTCTTCTTActccttacgcatctgtcgggtatttc  |                                                                                        |
| oAS807 | TAAATTC AATTTTCGCACTATAGCCGCACGTAAAAATAA<br>CTTAACATAATGcgtacgctgcagctcgac        | Amplify <i>hphNT1</i> from <i>pFA6a-hphNT1</i> to<br>delete <i>HTZ1</i>                |
| oAS808 | CAGGAGCAGGGAGAATTACGGGAAATGGGAAAGAAAA<br>ACTATTCTTCTTAatcgatgaattcgagctcg         |                                                                                        |
| oAS661 | TAAATTC AATTTTCGCACTATAGCCGCACGTAAAAATAA<br>CTTAACATAATGcgtacgctgcagctcgac        | Amplify <i>kanMX4</i> from <i>pFA6a-kanMX4</i> to<br>delete <i>HTZ1</i>                |
| oAS662 | CAGGAGCAGGGAGAATTACGGGAAATGGGAAAGAAAA<br>ACTATTCTTCTTAatcgatgaattcgagctcg         |                                                                                        |
| oAS388 | AACAGCTGA ACTATTATCCAGTG TAA                                                      | Verify <i>htz1Δ</i>                                                                    |
| oAS389 | CTCGGGTACGGAGAGACAAA                                                              |                                                                                        |
| oAS498 | GAAAAAGGAGATTAGAAATTGGCGATGATGCAAAGCTT<br>GTTAAAAACCCAgctacgctgcagctcgac          | Amplify <i>kanMX4</i> from <i>pFA6a-kanMX4</i> to<br>generate <i>mrc1-1-843.kanMX4</i> |
| oAS516 | ACAGCTTCTGGAGTTCAATCAACTTCTTCGGAAAAGAT<br>AAAAAACCACTAatcgatgaattcgagctcg         |                                                                                        |
| oAS347 | AAAATGGAGGATTTTCGTA                                                               | Verify <i>mrc1-1-843.kanMX4</i>                                                        |
| oAS517 | TCTTCTTTTGCTCCAAATGTTTA                                                           |                                                                                        |
| oAS283 | tgcgcaactgtgggaag                                                                 | Amplify <i>mrc1-aq.kanMX4</i> from <i>pRDK1779</i>                                     |

|         |                                                                                                                               |                                                                                                                                                 |
|---------|-------------------------------------------------------------------------------------------------------------------------------|-------------------------------------------------------------------------------------------------------------------------------------------------|
| oAS412  | GGCTCCTAGTCGTAATGGTCCTCGTATTTCAAGTTCTAA<br>GGCGTTGTTATttatgcttccggtcctatg                                                     |                                                                                                                                                 |
| oAS415  | CTCAATGCAGGGACGAAAAACAG                                                                                                       | Amplify <i>CAN1-URA3</i> from <i>pRDK1378</i> to insert at <i>YEL072W</i>                                                                       |
| oAS416  | GCGCTCTCCAACTAAGGGGGTTG                                                                                                       |                                                                                                                                                 |
| oAS455  | TGAATGTCGGGATAATTTGC                                                                                                          | Amplify <i>CAN1-URA3</i> from <i>pRDK1379</i> to insert at <i>YEL068C</i>                                                                       |
| oAS456  | GCAGCGAGCCTTAGTTCATC                                                                                                          |                                                                                                                                                 |
| oAS970  | GATCAGGGCTACAATTGCTTCAGGTGGTGTGTTTTGCCTCA<br>TATAAATAAAGCATTATTATTGAGAGTGGAAAAAAGG<br>GAAGTAGGAAATAAgagcagattgtactgagagtgcacc | Amplify <i>HIS3</i> from <i>pRS303</i> to introduce <i>HIS3</i> downstream of <i>HTZ1</i> and introduce K126R and K133R                         |
| oAS972  | ATACAGGAGCAGGGAGAATTACGGGAAATGGGAAAGA<br>AAAATATTCTTCctccttacgcatctgtcgggtatttc                                               |                                                                                                                                                 |
| oAS971  | GATCAGGGCTACAATTGCTTCAGGTGGTGTGTTTTGCCTCA<br>TATAAATAAAGCATTATTATTGAAAGTGGAAAAAAGG<br>GAAGTAAGAAATAAgagcagattgtactgagagtgcacc | Amplify <i>HIS3</i> from <i>pRS303</i> to introduce <i>HIS3</i> downstream of <i>HTZ1</i> ; use with oAS972                                     |
| oAS1374 | TTAGAGGTGACGATGAGTTAGATTCTTTGATCAGGGCT<br>ACAATTGCTTCAGGTGGTTAAgagcagattgtactgagagtgcacc                                      | Amplify <i>HIS3</i> from <i>pRS303</i> to introduce <i>HIS3</i> downstream of <i>HTZ1</i> and generate <i>htz1-1-114.HIS3</i> ; use with oAS972 |
| oAS1375 | TAGATTCTTTGATCAGGGCTACAATTGCTTCAGGTGGTG<br>TTTTGCCTCATATAAATTAagagcagattgtactgagagtgcacc                                      | Amplify <i>HIS3</i> from <i>pRS303</i> to introduce <i>HIS3</i> downstream of <i>HTZ1</i> and generate <i>htz1-1-120.HIS3</i> ; use with oAS972 |
| oAS1352 | gtggaagcttATGTCAGGAAAAGCTCATGG                                                                                                | Amplify <i>HTZ1</i> to clone into <i>pFA6a-hphNT1</i>                                                                                           |
| oAS1353 | gtgggtcgacTTATTTCTTACTTCCCTTTTTTTCCAC                                                                                         |                                                                                                                                                 |
| oAS1354 | gcgcccagctgaagcttATGTCAGGAAGAGCTCATGGAGGTA<br>GAGGTAGATCCGGCGCTAGAGACAGTGGTTCATTGAGATC                                        | Site-directed mutagenesis to generate <i>htz1-K4,9,11,15R</i>                                                                                   |
| oAS1355 | GATCTCAATGAACCACTGTCTCTAGCGCCGATCTACCT<br>CTACCTCCATGAGCTCTTCTGACATAagcttcagctggcggccgc                                       |                                                                                                                                                 |
| oAS1356 | gcgcccagctgaagcttATGTCAGGACAAGCTCATGGAGGTC<br>AAGGTCAATCCGGCGCTCAAGACAGTGGTTCATTGAGATC                                        | Site-directed mutagenesis to generate <i>htz1-K4,9,11,15Q</i>                                                                                   |
| oAS1357 | GATCTCAATGAACCACTGTCTTGAGCGCCGATTGACCT<br>TGACCTCCATGAGCTTGCTCTGACATAagcttcagctggcggccgc                                      |                                                                                                                                                 |
| oAS1359 | TAAATTCAATTTTCGCACTATAGCCGCACGTAAAAATAA<br>CTTAACATAATGTCAGGAAGAGCTCATGGAGGTAGAG                                              | Amplify <i>htz1-K4,9,11,15R.HPH</i> from <i>pRDK1835</i> for genomic insertion                                                                  |
| oAS1360 | TAAATTCAATTTTCGCACTATAGCCGCACGTAAAAATAA<br>CTTAACATAATGTCAGGACAAGCTCATGGAGGTCAAG                                              | Amplify <i>htz1-K4,9,11,15Q.HPH</i> from <i>pRDK1836</i> for genomic insertion                                                                  |
| oAS1361 | CAGGAGCAGGGAGAATTACGGGAAATGGGAAAGAAAA<br>ACTATTCTTCTTAatcgatgaattcgagctcg                                                     | Reverse primer for oAS1359 and oAS1360                                                                                                          |
| oAS518  | GGTTGCCAAGAAGCTGCTGAAGGTTCTGGTGGCTTTGGT<br>GTGTTGTTGATGcgtacgctgcaggtcgac                                                     | Amplify <i>hphNT1</i> from <i>pFA6a-hphNT1</i> to delete <i>RAD52</i>                                                                           |
| oAS519  | AATAAATAATGATGCAAATTTTTTATTGTTTCGGCCAG<br>GAAGCGTTTCAatcgatgaattcgagctcg                                                      |                                                                                                                                                 |
| oAS33   | ATCGAATGGCGTTTTTAAGC                                                                                                          | Verify <i>rad52Δ</i>                                                                                                                            |
| oAS34   | CGACACATGGAGGAAAGAAAA                                                                                                         |                                                                                                                                                 |
| BZP458  | ATCTAACCACACTAGAGGAGGCCGATTCATTATATATCT<br>CAATGGGACTGcgtacgctgcaggtcgac                                                      | Amplify <i>EGFP.hphNT1</i> from <i>pYM25</i> to tag <i>DDC2</i>                                                                                 |
| BZP459  | ACAAGGTTTCTATAAAGCGTTGACATTTTCCCTTTTGA<br>TTGTTGCCCTTAatcgatgaattcgagctcg                                                     |                                                                                                                                                 |
| BZP475  | GAACGGGGAGAATAATGCAA                                                                                                          | Verify <i>DDC2-EGFP.hph</i> tag                                                                                                                 |

|        |                                                                                   |                                                                 |
|--------|-----------------------------------------------------------------------------------|-----------------------------------------------------------------|
| BZP476 | TTGCATTATTCTCCCCGTTC                                                              |                                                                 |
| BZP14  | CCGTCGAACGTCGCGGGCGGTCTTTCTGACATTGGTAAG<br>AATACTTCCAACcgtacgctgcaggtcgac         | Amplify <i>EGFP.hphNT1</i> from <i>pYM25</i> to tag <i>HUG1</i> |
| BZP15  | TTGTTCTTTCTATCATTGGCCTACAAAAAAAAAAGAGAA<br>GCATGCTCTTAatcgatgaattcgagctcg         |                                                                 |
| BZP18  | AGCAATTCTTCCTTGACGATGT                                                            | Verify <i>HUG1-EGFP.hph</i> tag                                 |
| BZP19  | CGATGTTCCAAAACAGTAACGA                                                            |                                                                 |
| oAS31  | AACGCCATAGAAAAGAGCATAGTGAGAAAATCTTCAAC<br>ATCAGGGCTATGgagcagattgactgagagtgcacc    | Amplify <i>HIS3</i> from <i>pRS303</i> to delete <i>RAD9</i>    |
| oAS32  | TTAATCGTCCCTTTCTATCAATTATGAGTTTATATATTTT<br>TATAATTTCActccttacgcactctgtgcggtatttc |                                                                 |
| oAS49  | ACACGCGAGGATTTTTGTTC                                                              | Verify <i>rad9Δ</i>                                             |
| oAS50  | CGTGTGGGAGGATGTTCTTAG                                                             |                                                                 |

## Supplementary References

1. Naylor ML, Li JM, Osborn AJ, Elledge SJ. Mrc1 phosphorylation in response to DNA replication stress is required for Mec1 accumulation at the stalled fork. *Proc Natl Acad Sci U S A* **106**, 12765-12770 (2009).
2. Putnam CD, *et al.* A genetic network that suppresses genome rearrangements in *Saccharomyces cerevisiae* and contains defects in cancers. *Nat Commun* **7**, 11256 (2016).
3. Brachmann CB, *et al.* Designer deletion strains derived from *Saccharomyces cerevisiae* S288C: a useful set of strains and plasmids for PCR-mediated gene disruption and other applications. *Yeast* **14**, 115-132 (1998).
4. Gonzalez-Huici V, *et al.* DNA bending facilitates the error-free DNA damage tolerance pathway and upholds genome integrity. *EMBO J* **33**, 327-340 (2014).
